# Supplementary material for: Accelerated synthesis of large generation triazine dendrimers using microwave assisted reactions: a 24 hour challenge
Source: Royal Society of Chemistry journal article supplement (doi:10.1039/c5py00899a), 2015-01-01
Supplement: c5py00899a1.pdf [file c5py00899a1.pdf]

# Accelerated Synthesis of Large Generation Triazine Dendrimers Using Microwave Assisted Reactions: A 24 Hours Challenge

Alan E. Enciso, Fermin Ramirez-Crescencio, Michael J. Zeiser, Rocio Redon

and Eric E. Simanek\*

## Contributions

A.E.E. guided the synthetic efforts, overseeing the contributions of F.R-C. (a visiting scholar from the group of R.R.) and undergraduate M.J.Z. E.E.S. contributed to the oversight and communication of the project.

*Department of Chemistry, Texas Christian University  
Fort Worth, TX 76129*

## Table of Contents

|                                   |    |
|-----------------------------------|----|
| General Experimental              | 3  |
| Compound 1                        | 4  |
| SI Figure 1. <sup>1</sup> H NMR   | 5  |
| SI Figure 2. <sup>13</sup> C NMR  | 6  |
| SI Figure 3. Mass Spectra         | 7  |
| Compound 2                        | 8  |
| SI Figure 4. <sup>1</sup> H NMR   | 9  |
| SI Figure 5. <sup>13</sup> C NMR  | 10 |
| SI Figure 6. Mass Spectra         | 11 |
| Compound 3                        | 12 |
| SI Figure 7. <sup>1</sup> H NMR   | 13 |
| SI Figure 8. <sup>13</sup> C NMR  | 14 |
| SI Figure 9. Mass Spectra         | 15 |
| Compound 4                        | 16 |
| SI Figure 10. <sup>1</sup> H NMR  | 17 |
| SI Figure 11. <sup>13</sup> C NMR | 18 |
| SI Figure 12. Mass Spectra        | 19 |

|                                   |    |
|-----------------------------------|----|
| Compound 5                        | 20 |
| SI Figure 13. $^1\text{H}$ NMR    | 21 |
| SI Figure 14. $^{13}\text{C}$ NMR | 22 |
| SI Figure 15. Mass Spectra        | 23 |
| Compound 6                        | 24 |
| SI Figure 16. $^1\text{H}$ NMR    | 25 |
| SI Figure 17. $^{13}\text{C}$ NMR | 26 |
| SI Figure 18. Mass Spectra        | 27 |
| Compound 7                        | 28 |
| SI Figure 19. $^1\text{H}$ NMR    | 29 |
| SI Figure 20. $^{13}\text{C}$ NMR | 30 |
| SI Figure 21. Mass Spectra        | 31 |
| Compound 8                        | 32 |
| SI Figure 22. $^1\text{H}$ NMR    | 33 |
| SI Figure 23. $^{13}\text{C}$ NMR | 34 |
| SI Figure 24. Mass Spectra        | 35 |
| Compound 9                        | 36 |
| SI Figure 25. $^1\text{H}$ NMR    | 37 |
| SI Figure 26. $^{13}\text{C}$ NMR | 38 |
| SI Figure 26. Mass Spectra        | 39 |
| Compound 10                       | 40 |
| SI Figure 28. $^1\text{H}$ NMR    | 41 |
| SI Figure 29. $^{13}\text{C}$ NMR | 42 |
| Compound 11                       | 43 |
| SI Figure 30. $^1\text{H}$ NMR    | 44 |
| SI Figure 31. $^{13}\text{C}$ NMR | 45 |
| Compound 12                       | 46 |
| SI Figure 32. $^1\text{H}$ NMR    | 47 |
| SI Figure 33. $^{13}\text{C}$ NMR | 48 |
| GPC Analysis                      | 49 |

## General Experimental

**Microwave.** A CEM SP Discovery microwave was utilized for these experiments. Reactions were performed in dynamic mode wherein microwave power (250 watts) is modulated to maintain the set-point temperature—here either 60 °C or 95 °C.

**Automated chromatography.** A CombiFlash RF automatic chromatographer (Teledyne ISCO) was used up to Generation 3 dendrimer. The separations were performed using a solid loading method in a 25 g preloaded cartridge.

**Compound 1.** 1-Boc-piperazine (11.14 g, 60 mmol) was added to a solution of cyanuric chloride (5.02 g, 27 mmol) in THF (200mL). Afterwards DIPEA (19 mL, 0.109 mol) was added dropwise. The solution was stirred for 2 minutes in order to allow reagents to mix. Then, the solution was separated in multiple vessels and irradiated in the microwave while stirring for 10 minutes at 60°C using dynamic mode. The crude product was purified by precipitations hexanes/EtOAc to give **1** (10.83 g, 82%) as a white solid. <sup>1</sup>H NMR (400 MHz, CDCl<sub>3</sub>) δ 3.74 (br, 8H, NCH<sub>2</sub>CH<sub>2</sub>NBoc), 3.44 (br, 8H, NCH<sub>2</sub>CH<sub>2</sub>NBoc), 1.45 (s, 18H, C(CH<sub>3</sub>)<sub>3</sub>); <sup>13</sup>C NMR (100 MHz, CDCl<sub>3</sub>) δ 169.6, 164.4 (C<sub>3</sub>N<sub>3</sub>), 156.5 (CO), 80.1 (C(CH<sub>3</sub>)<sub>3</sub>), 43.2 (NCH<sub>2</sub>CH<sub>2</sub>N), 28.3 (C(CH<sub>3</sub>)<sub>3</sub>); MS (ESI-TOF) calcd for C<sub>21</sub>H<sub>34</sub>ClN<sub>7</sub>O<sub>4</sub> 483.2361, found 484.3702 (M + H)<sup>+</sup>.

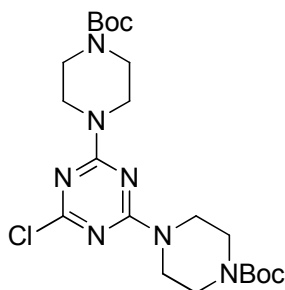

SI Figure 1.  $^1\text{H}$ NMR

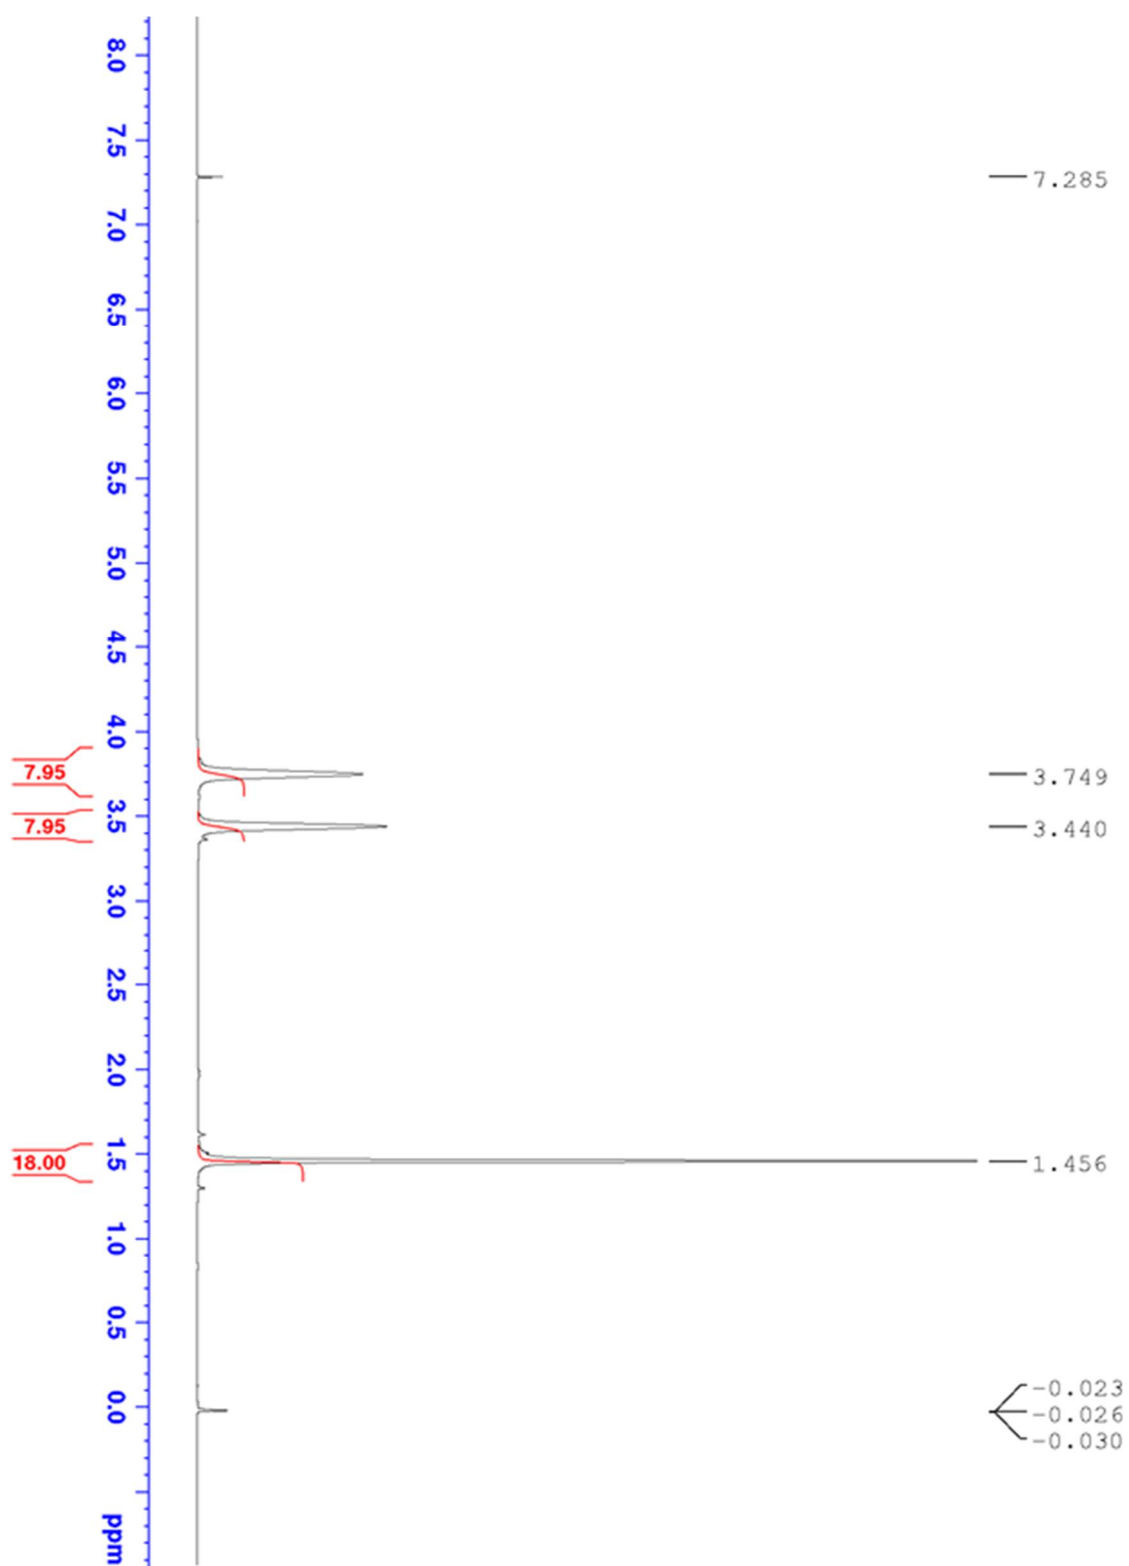

SI Figure 2.  $^{13}\text{C}$ NMR

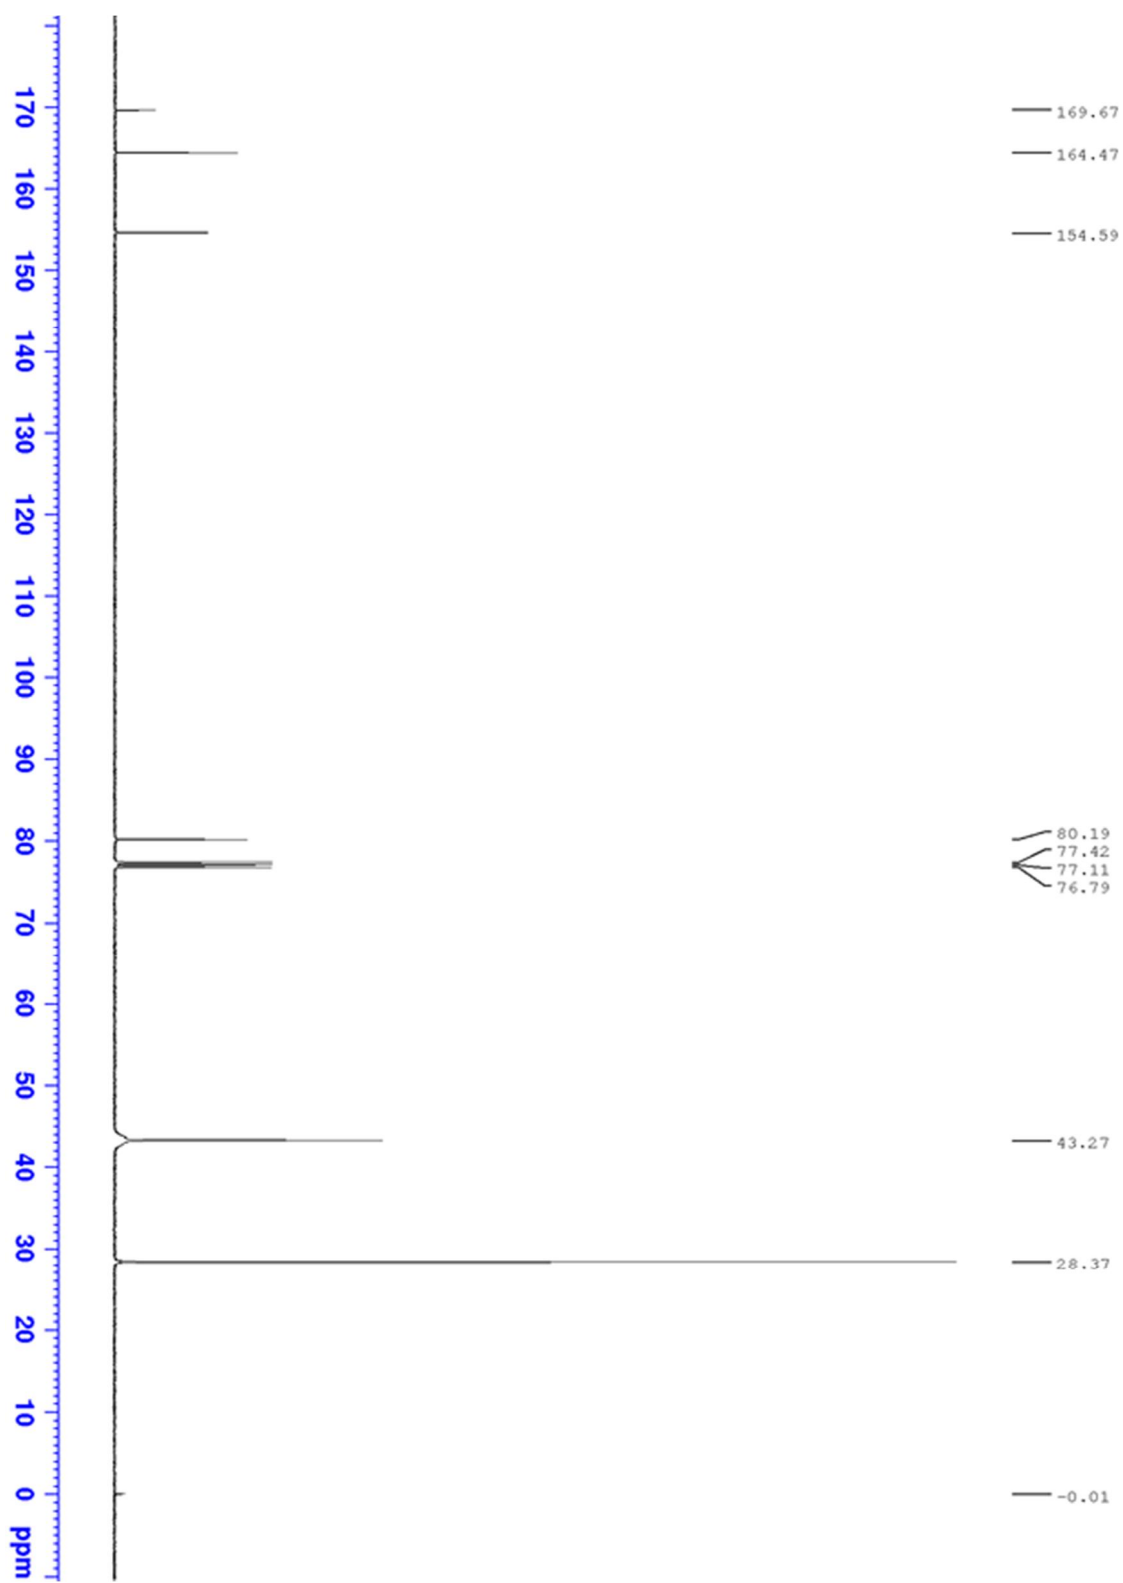

SI Figure 3. Mass Spectra

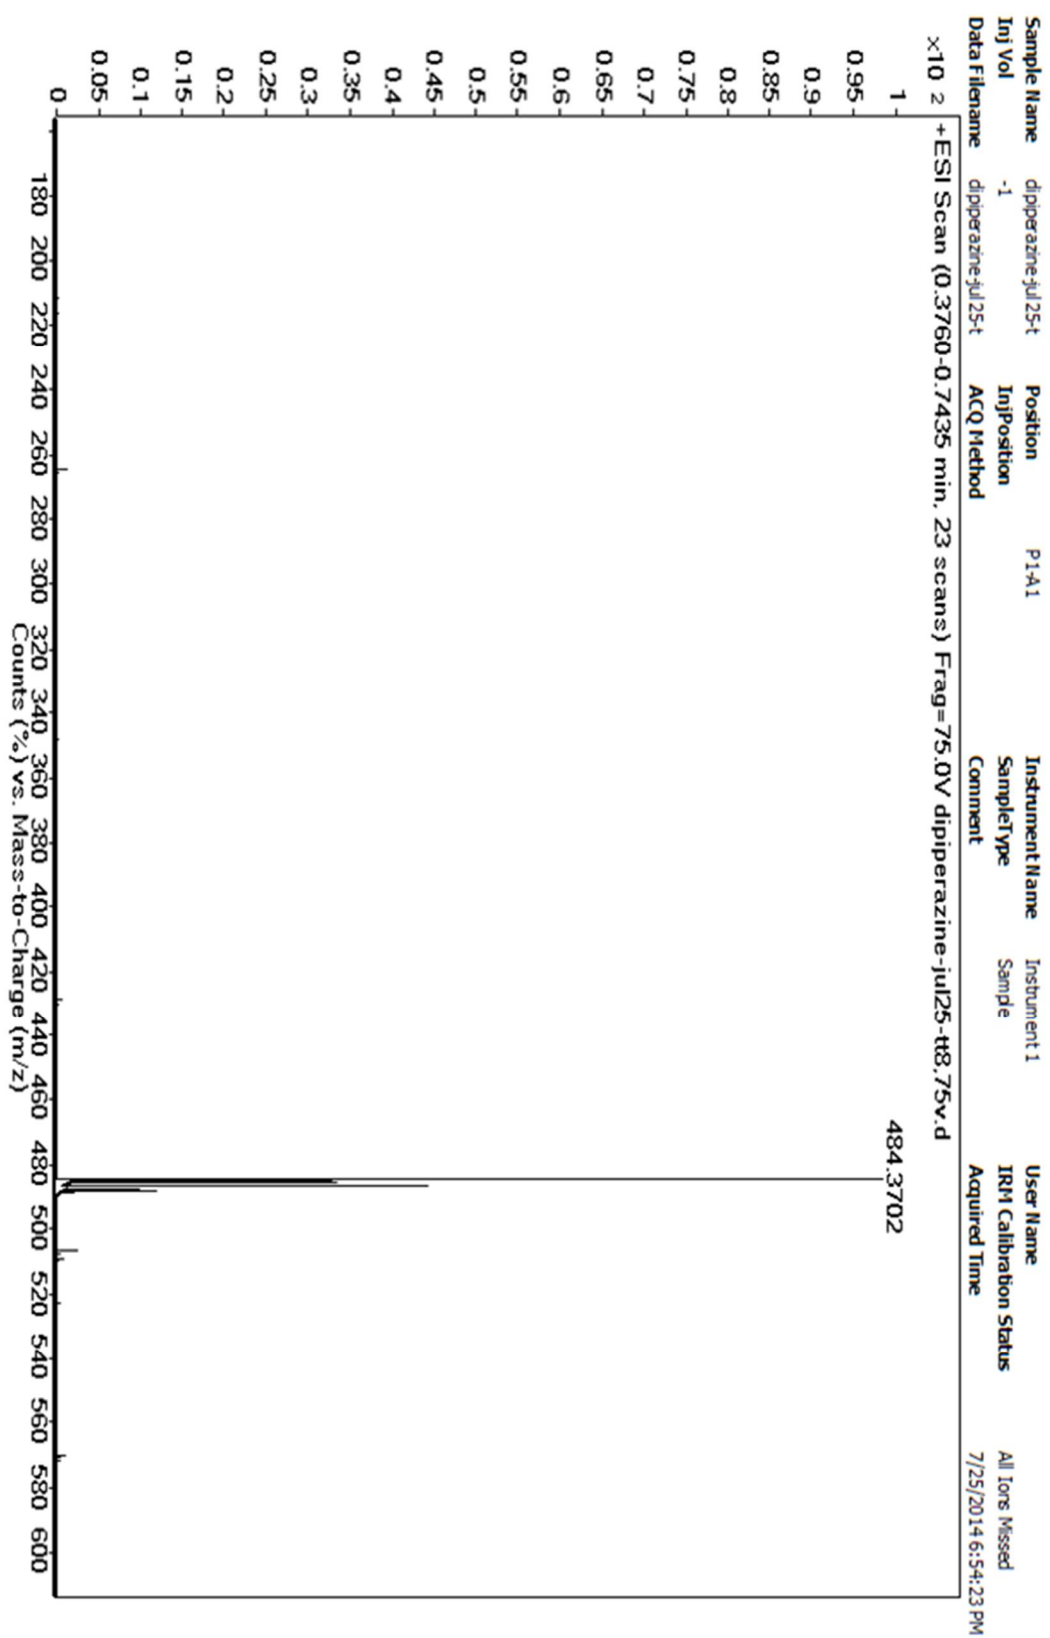

**Compound 2.** A solution of **1** (3g, 6 mmol) with 4,7,10-trioxa-1,13-tridecanediamine (13.65mL, 62 mmol) and Cs<sub>2</sub>CO<sub>3</sub> (4g, 12 mmol) in 40 mL of 1,4 dioxane was stirred for 2 minutes. Then, the solution was separated in multiple vessels and irradiated in the microwave while stirring for 30 minutes at 95°C and then evaporated under vacuum. The residue was dissolved in dichloromethane, washed with brine solution and dried over MgSO<sub>4</sub>, filtered, and evaporated under vacuum. The solvent system (in column volumes) used was the following: 5CV (100%DCM), 5CV (95:5= DCM: MeOH), 5CV (90:10= DCM: MeOH), 5CV (85:15= DCM: MeOH), 5CV (80:20= DCM: MeOH) to give **2** (3.26 g, 79%) as a white solid. <sup>1</sup>H NMR (400 MHz, CDCl<sub>3</sub>) δ 3.73 (br, 8H, NCH<sub>2</sub>CH<sub>2</sub>NBoc), 3.67-3.57 (m, 12H, CH<sub>2</sub>OCH<sub>2</sub>CH<sub>2</sub>OCH<sub>2</sub>CH<sub>2</sub>OCH<sub>2</sub>), 3.44 (br, 10H, NHCH<sub>2</sub>CH<sub>2</sub>CH<sub>2</sub>O, NCH<sub>2</sub>CH<sub>2</sub>NBoc), 2.81 (t, 2H, OCH<sub>2</sub>CH<sub>2</sub>CH<sub>2</sub>NH<sub>2</sub>), 1.84 (m, 2H, OCH<sub>2</sub>CH<sub>2</sub>CH<sub>2</sub>NH), 1.76 (m, 2H, OCH<sub>2</sub>CH<sub>2</sub>CH<sub>2</sub>NH<sub>2</sub>), 1.47 (s, 18H, C(CH<sub>3</sub>)<sub>3</sub>); <sup>13</sup>C NMR (100 MHz, CDCl<sub>3</sub>) δ 166.3, 165.2 (C<sub>3</sub>N<sub>3</sub>), 154.8 (CO), 79.8 (C(CH<sub>3</sub>)<sub>3</sub>), 70.5 (OCH<sub>2</sub>CH<sub>2</sub>O), 70.2 (OCH<sub>2</sub>CH<sub>2</sub>O), 70.1 (OCH<sub>2</sub>CH<sub>2</sub>O), 69.5 (two lines, NHCH<sub>2</sub>CH<sub>2</sub>CH<sub>2</sub>O, OCH<sub>2</sub>CH<sub>2</sub>CH<sub>2</sub>NH<sub>2</sub>), 43.8 (piperazine), 39.4 (NHCH<sub>2</sub>CH<sub>2</sub>CH<sub>2</sub>O), 38.2 (OCH<sub>2</sub>CH<sub>2</sub>CH<sub>2</sub>NH<sub>2</sub>), 32.6 (OCH<sub>2</sub>CH<sub>2</sub>CH<sub>2</sub>NH<sub>2</sub>), 29.6 (NHCH<sub>2</sub>CH<sub>2</sub>CH<sub>2</sub>O), 28.6 (C(CH<sub>3</sub>)<sub>3</sub>); MS (ESI-TOF) calcd for C<sub>31</sub>H<sub>57</sub>N<sub>9</sub>O<sub>7</sub> 667.4381, found 668.5915(M + H)<sup>+</sup>.

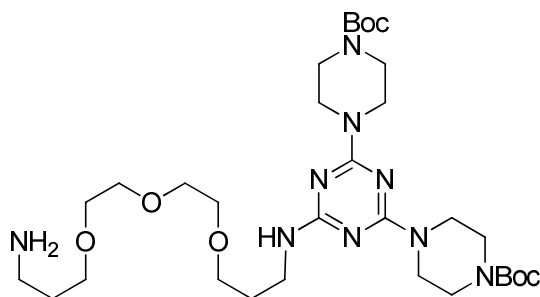



SI Figure 4.  $^1\text{H}$ NMR

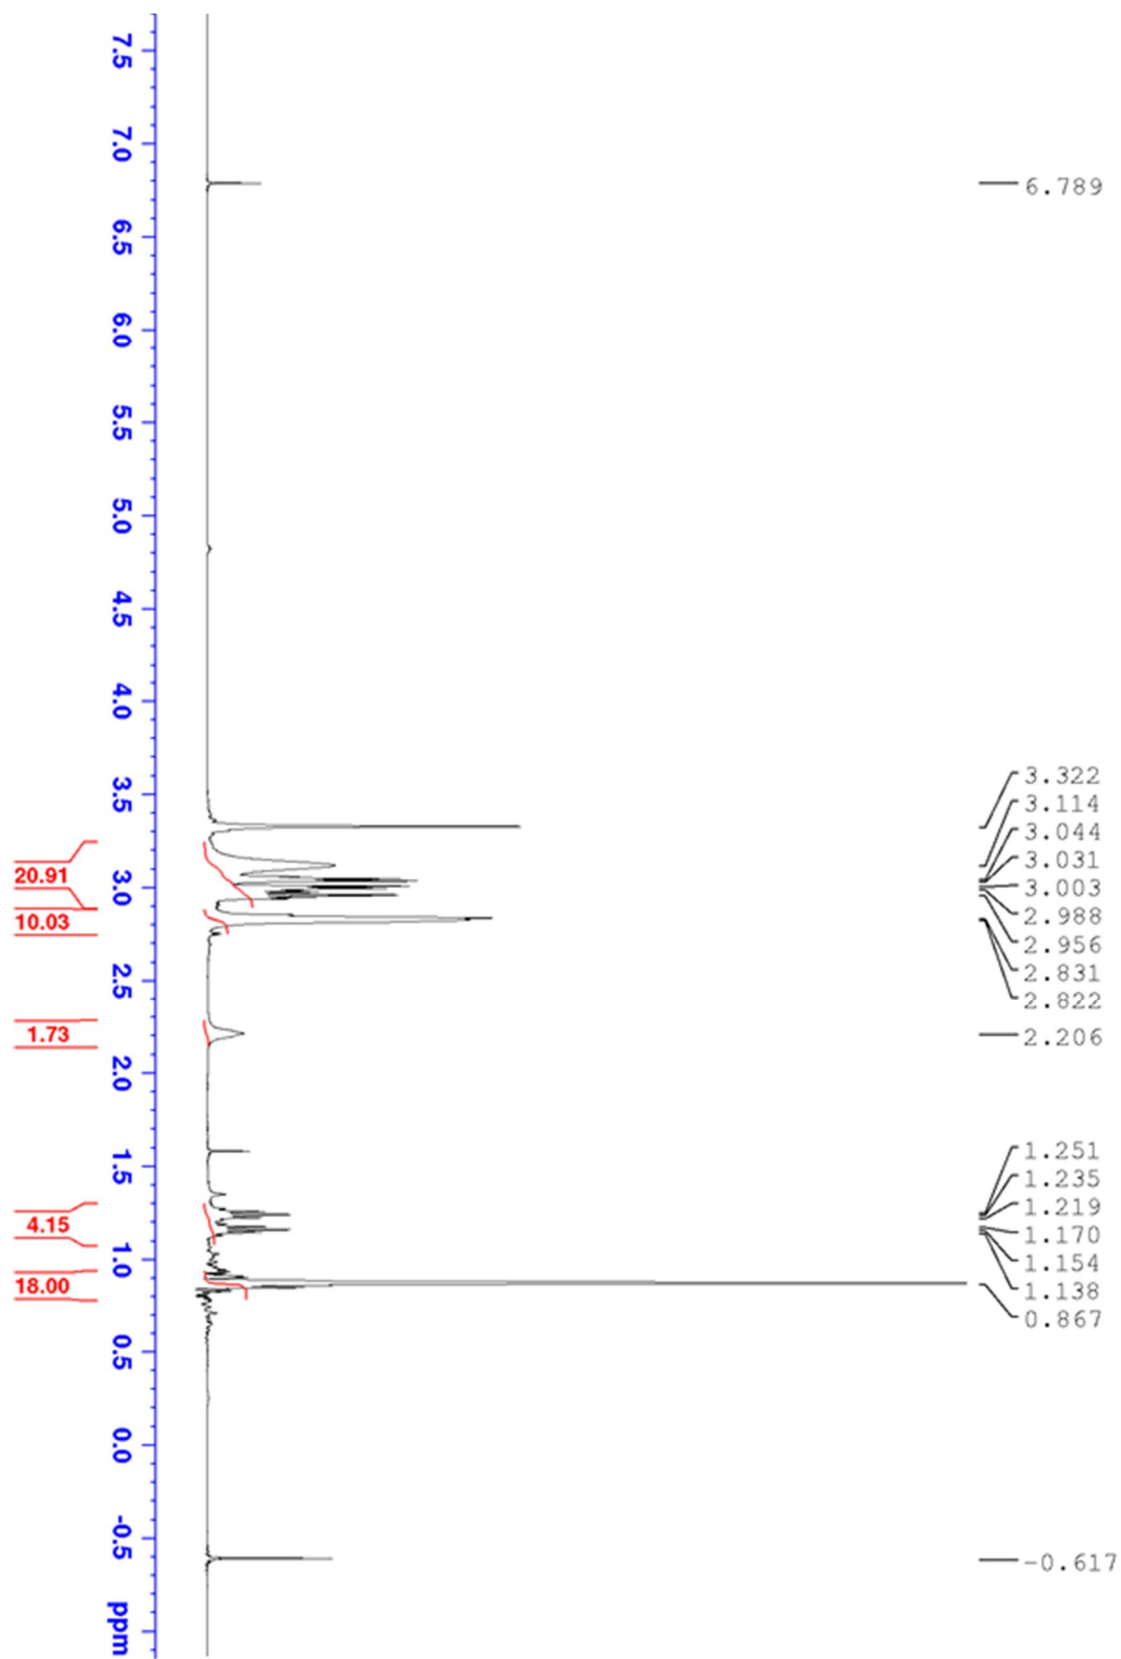

SI Figure 5.  $^{13}\text{C}$ NMR

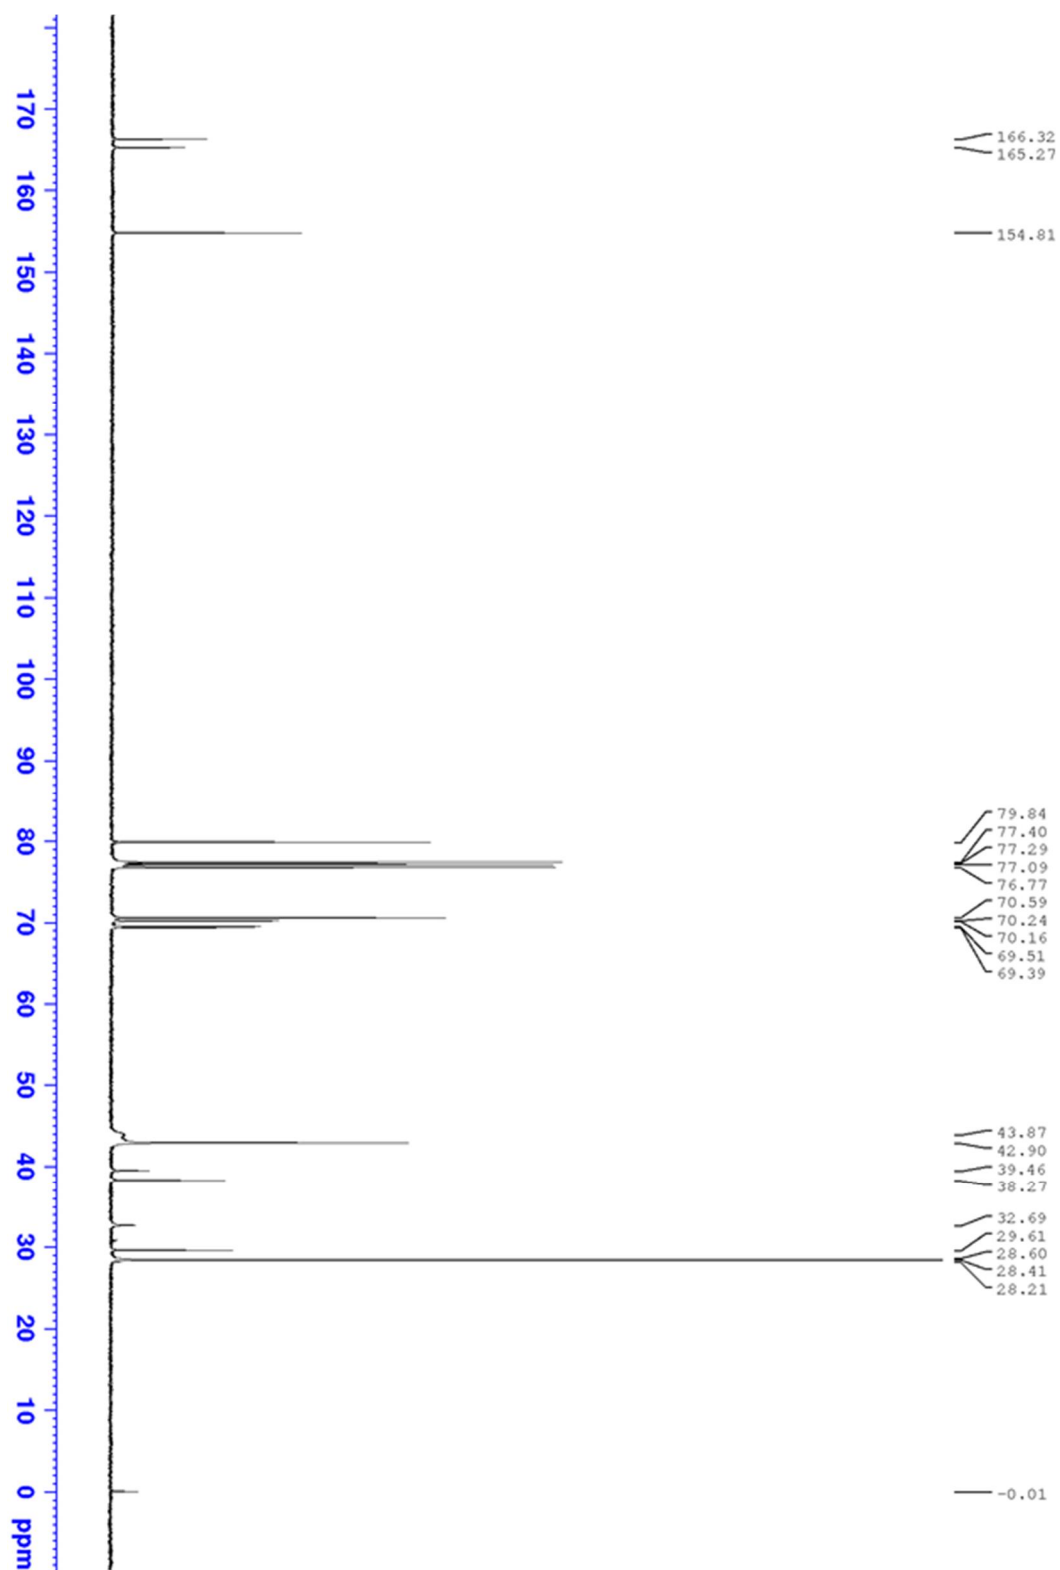

SI Figure 6. Mass Spectra

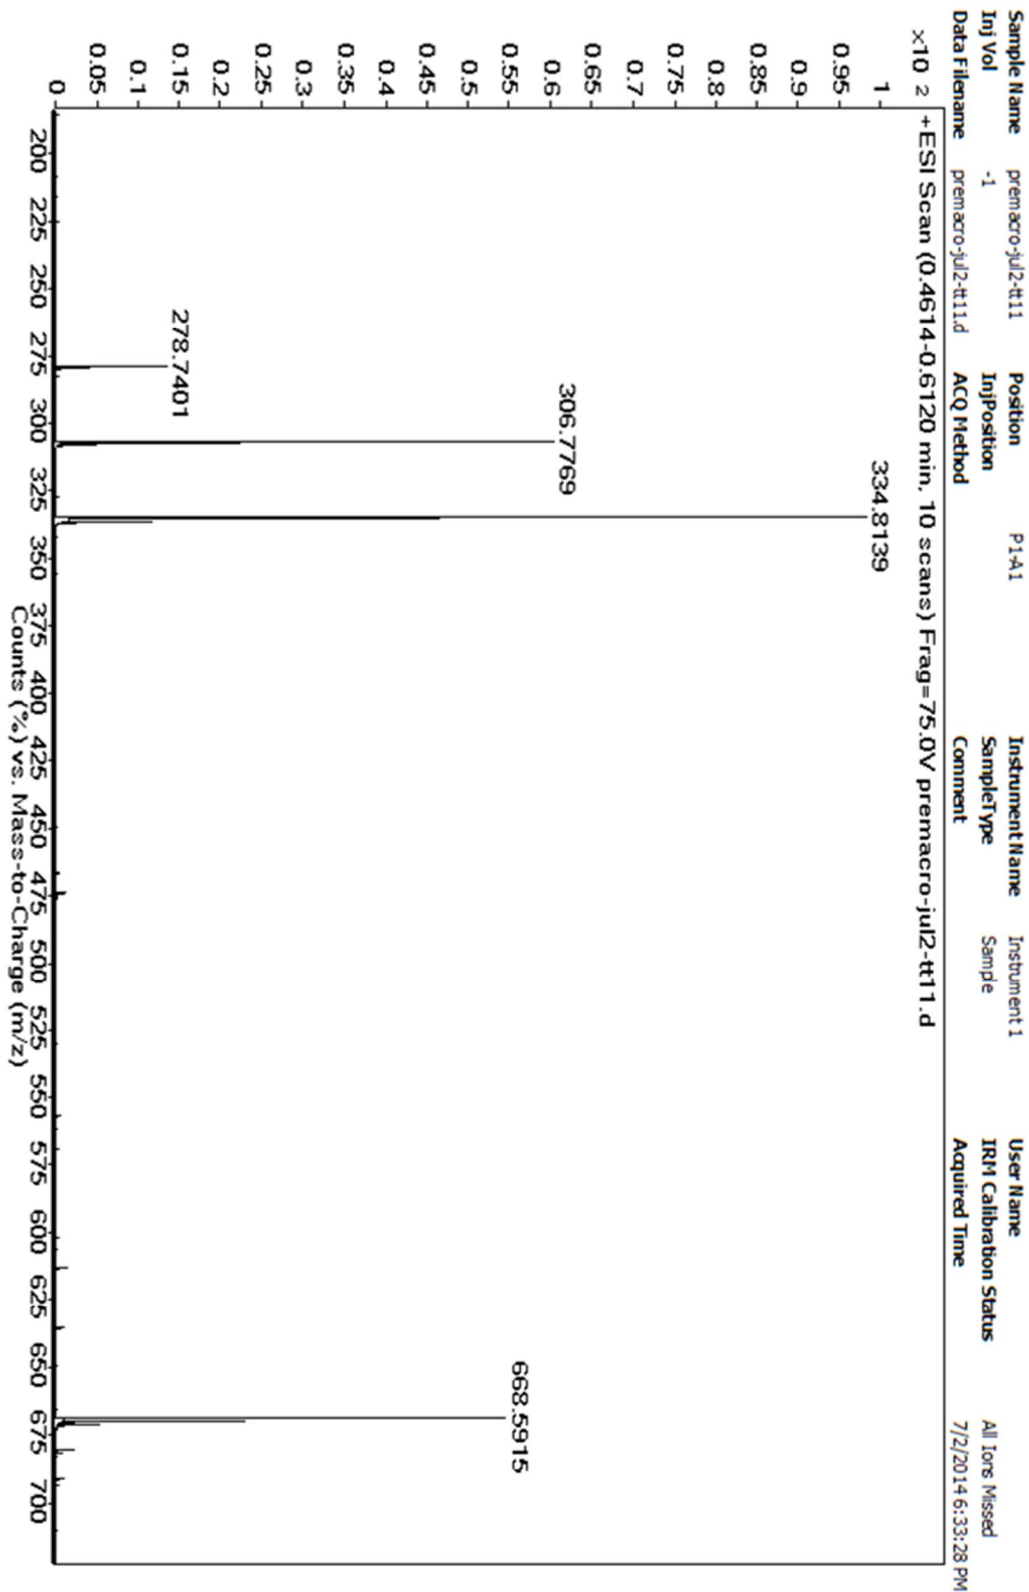



SI Figure 7.  $^1\text{H}$ NMR

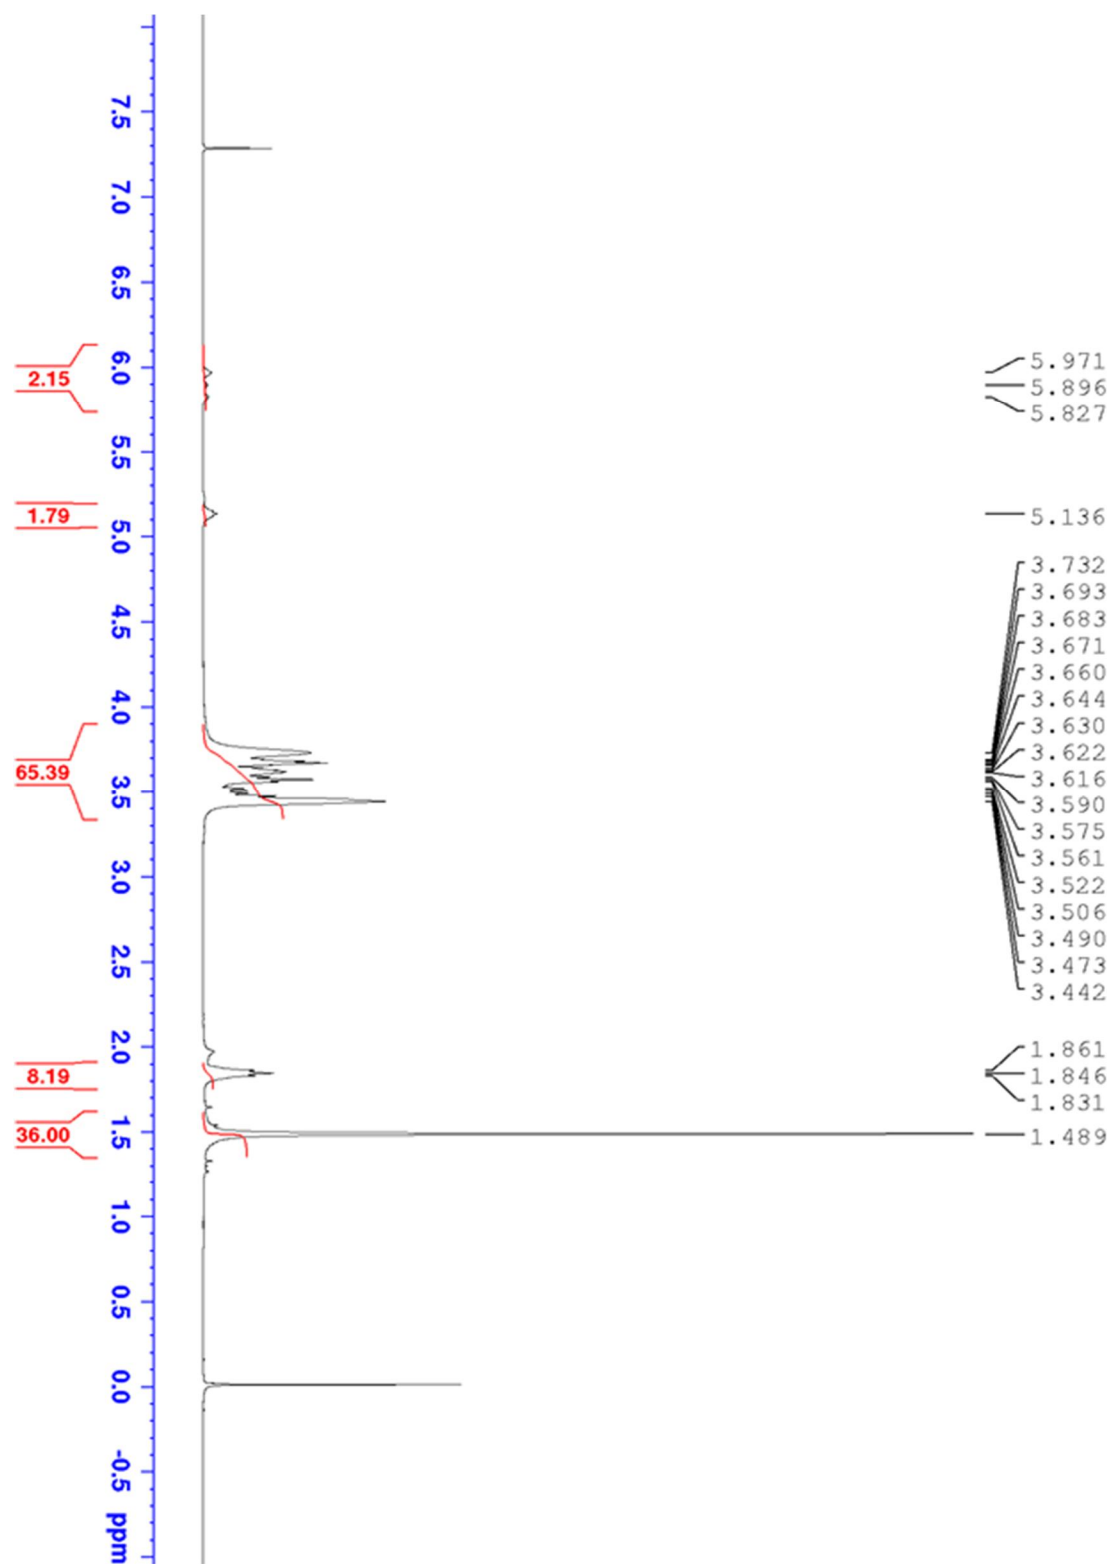

SI Figure 8.  $^{13}\text{C}$ NMR

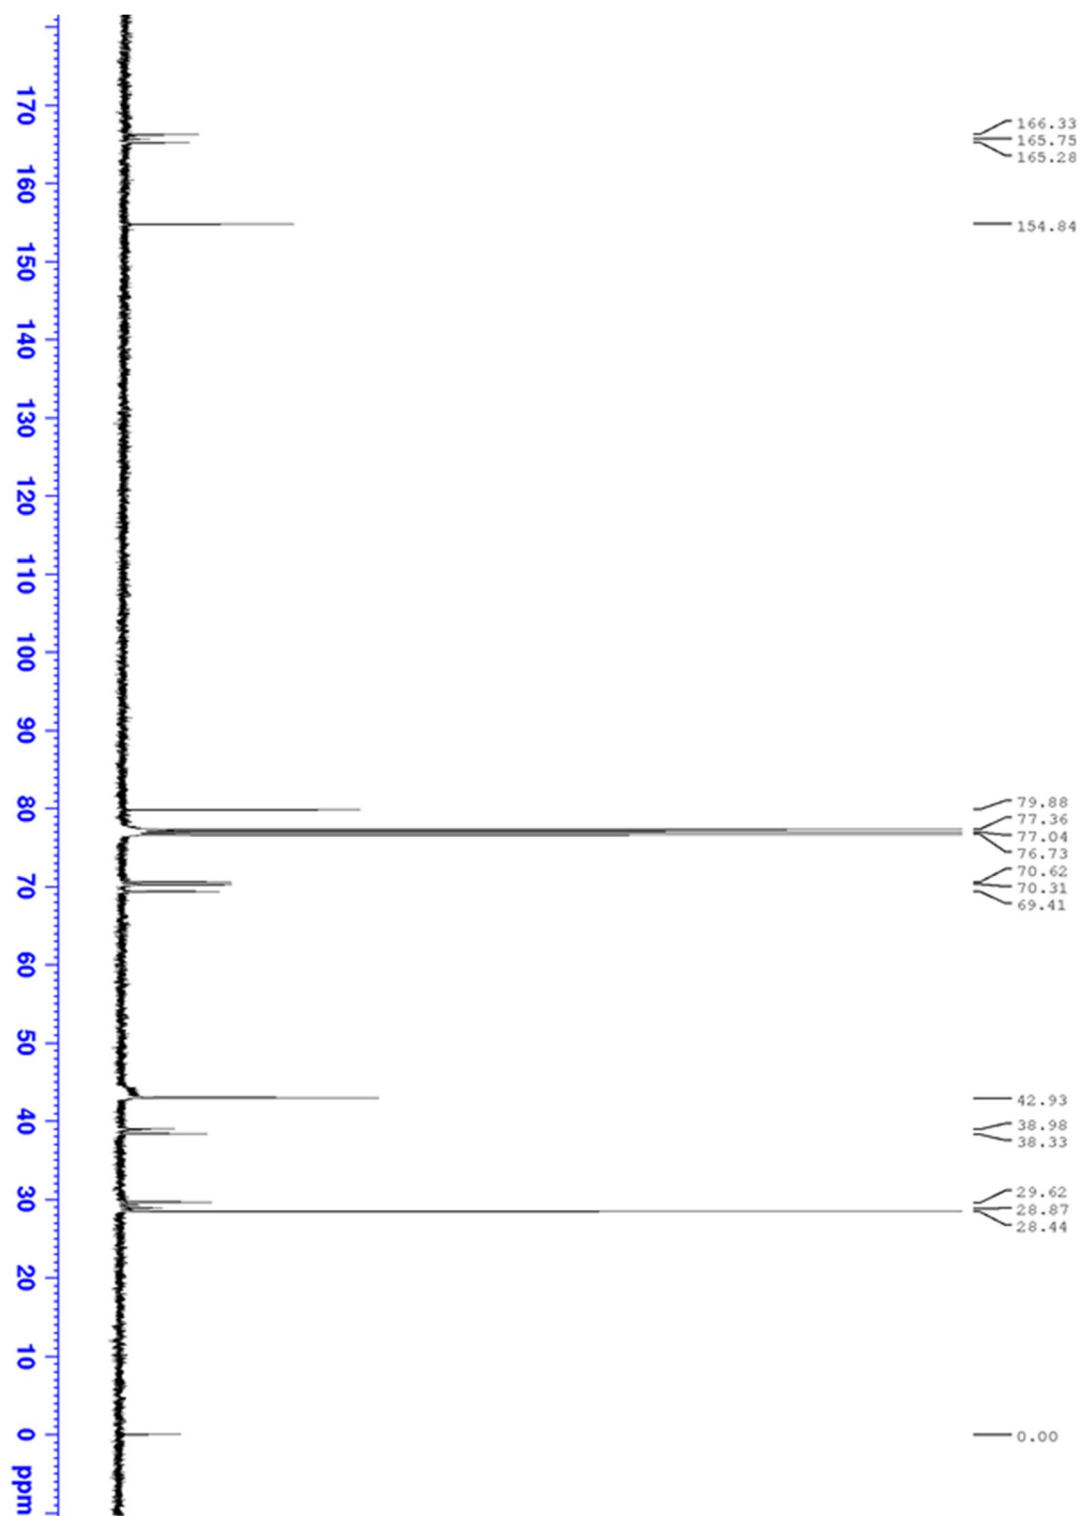

SI Figure 9. Mass Spectra

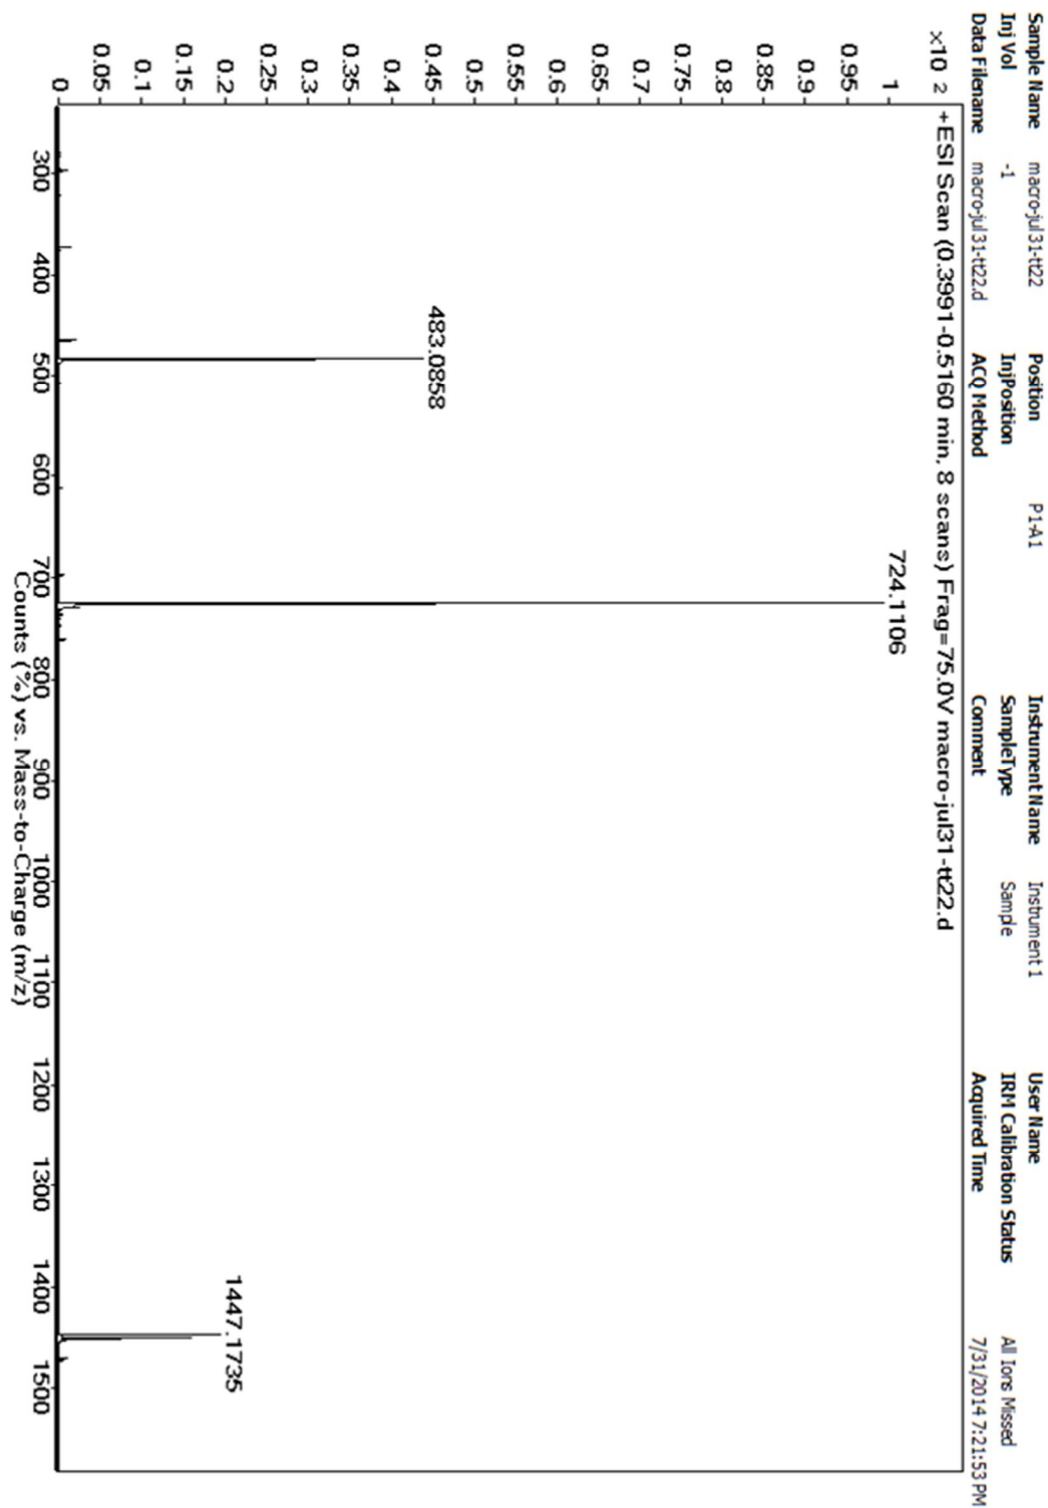

**Compound 4 (G1-Boc)** A solution of **3** (0.743g, 0.5 mmol) with **2** (1.042g, 2 mmol) and  $\text{Cs}_2\text{CO}_3$  (1.066g, 3 mmol) in 5mL of 1,4 dioxane and 0.5mL MeOH was stirred for 2 minutes. Then, the solution was irradiated in the microwave while stirring for 2 hours 30 minutes at 95°C using dynamic mode and then evaporated under vacuum. The residue was dissolved in dichloromethane, washed with brine solution and dried over  $\text{MgSO}_4$ , filtered, and evaporated under vacuum. The crude was purified by automated chromatography. The solvent system (in column volumes) used was the following: 20CV (100% DCM), 5CV (90:10= DCM: MeOH) to give **4** (0.709g, 66%) as a white solid.  $^1\text{H}$  NMR (400 MHz,  $\text{CDCl}_3$ )  $\delta$  3.71 (br, 24H,  $\text{NCH}_2\text{CH}_2\text{NBoc}$ ), 3.64-3.52 (m, 36H,  $\text{CH}_2\text{OCH}_2\text{CH}_2\text{OCH}_2\text{CH}_2\text{OCH}_2$ ) 3.43 (br, 36H,  $\text{C}_3\text{N}_3\text{-NHCH}_2\text{CH}_2\text{CH}_2\text{O}$ ,  $\text{BocNCH}_2\text{CH}_2\text{N}$ ), 1.83 (m, 12H,  $\text{OCH}_2\text{CH}_2\text{CH}_2\text{NH}$ ), 1.46 (s, 54H,  $\text{C}(\text{CH}_3)_3$ );  $^{13}\text{C}$  NMR (100 MHz,  $\text{CDCl}_3$ )  $\delta$  166.3, 165.26 ( $\text{C}_3\text{N}_3$ ), 154.8 (CO), 79.8 ( $\text{C}(\text{CH}_3)_3$ ), 70.6 ( $\text{OCH}_2\text{CH}_2\text{O}$ ), 70.2 (two lines,  $\text{OCH}_2\text{CH}_2\text{O}$ ), 69.2 (two lines,  $\text{NHCH}_2\text{CH}_2\text{CH}_2\text{O}$ ), 42.9 (piperazine), 38.2 ( $\text{NHCH}_2\text{CH}_2\text{CH}_2\text{O}$ ), 38.1 ( $\text{NHCH}_2\text{CH}_2\text{CH}_2\text{O}$ ), 29.6 ( $\text{NHCH}_2\text{CH}_2\text{CH}_2\text{O}$ ), 28.4 ( $\text{C}(\text{CH}_3)_3$ ); MS (ESI-TOF) calcd for  $\text{C}_{96}\text{H}_{168}\text{N}_{30}\text{O}_{21}$  2077.3000, found 2079.6681 ( $\text{M} + \text{H}$ ) $^+$ .

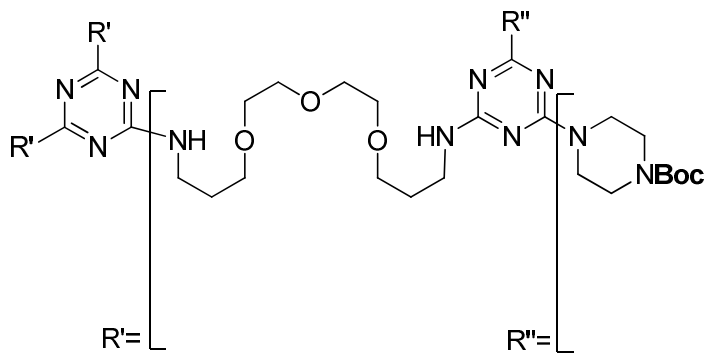



SI Figure 10.  $^1\text{H}$ NMR

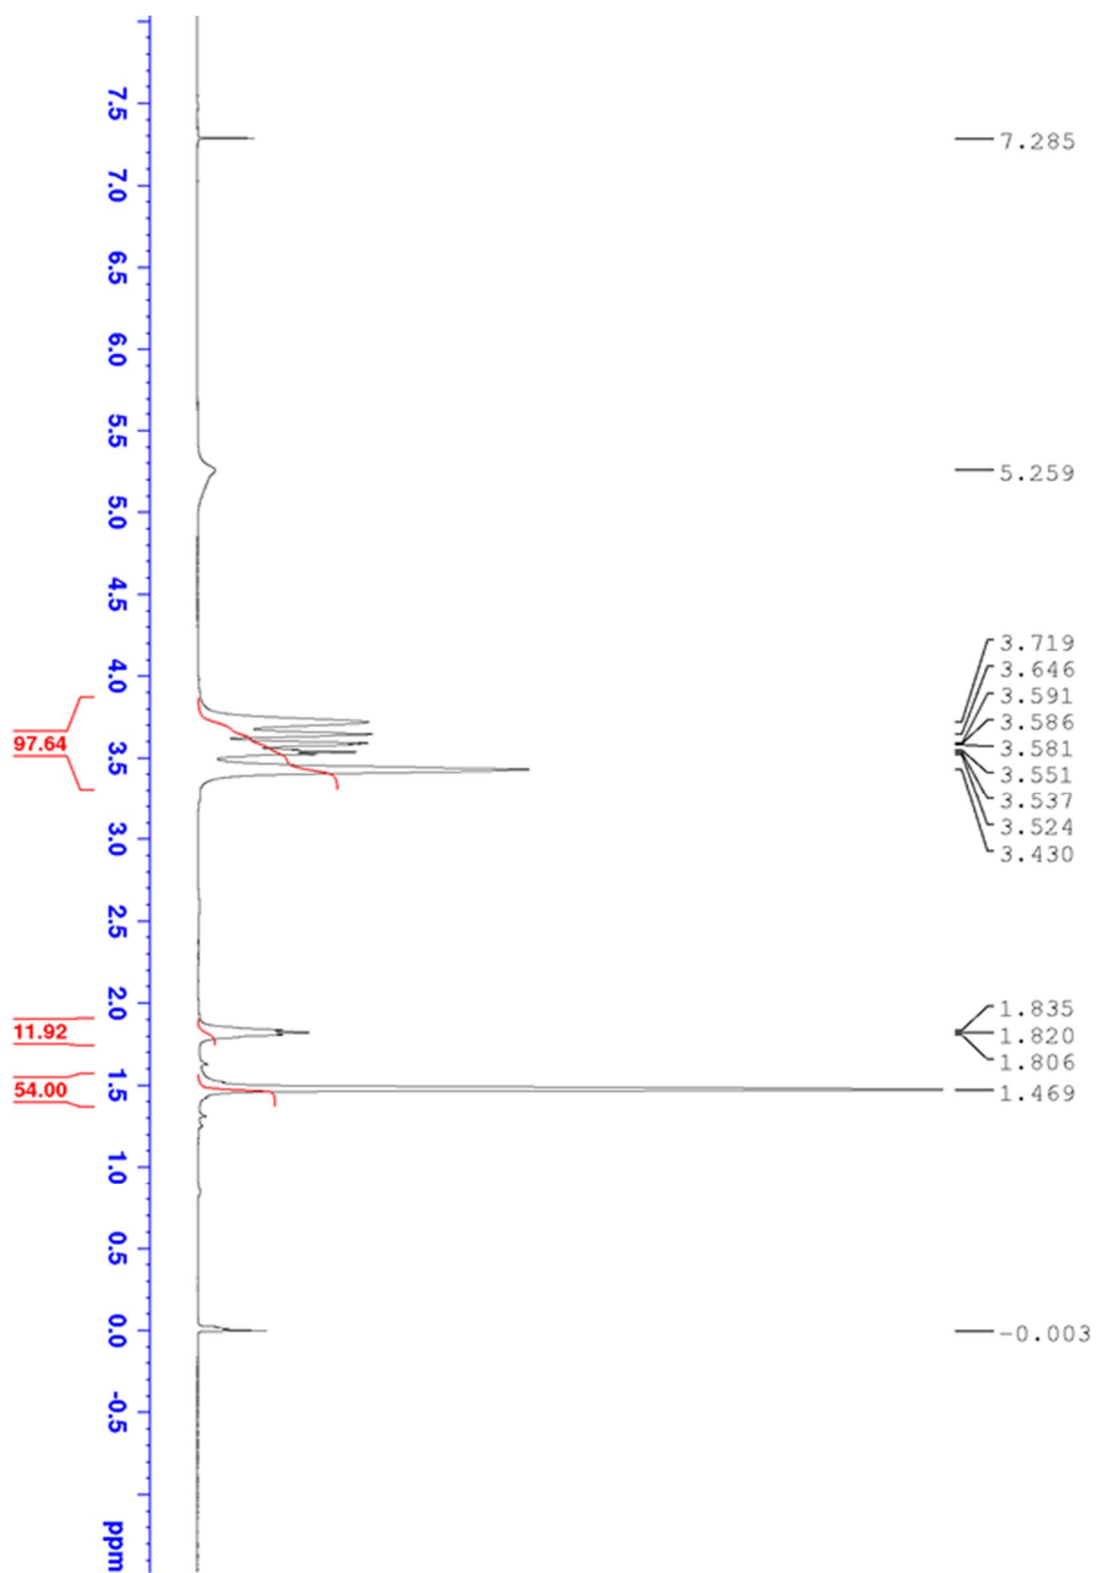

SI Figure 11.  $^{13}\text{C}$ NMR

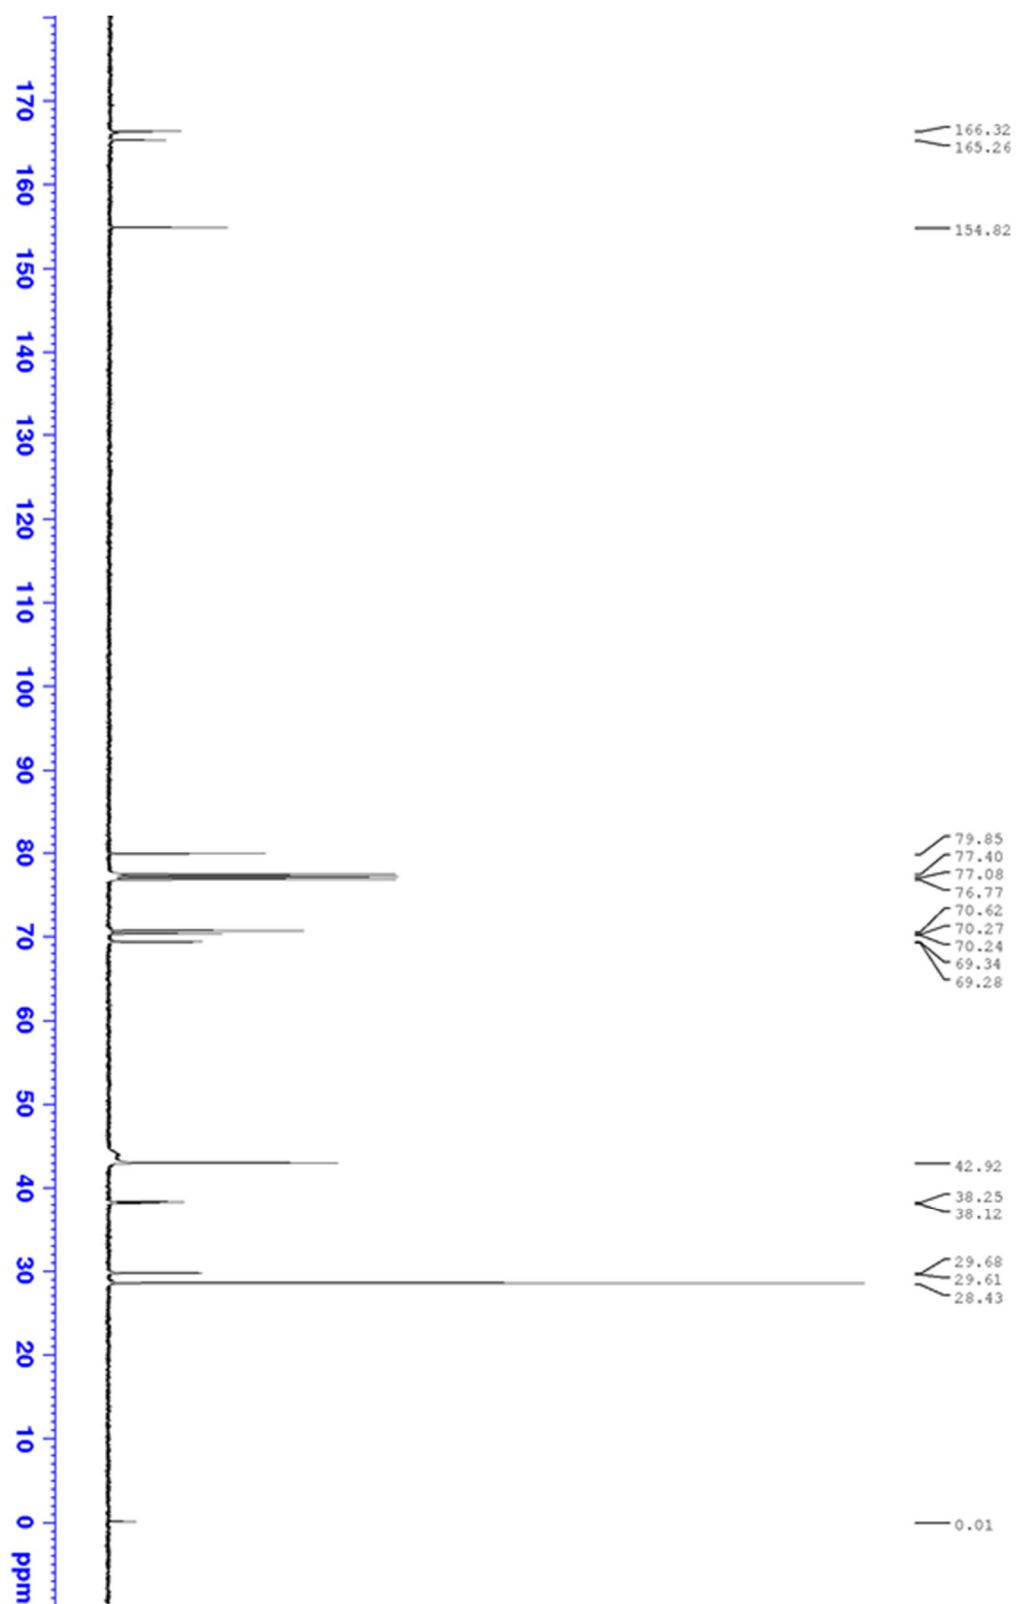

SI Figure 12. Mass Spectra

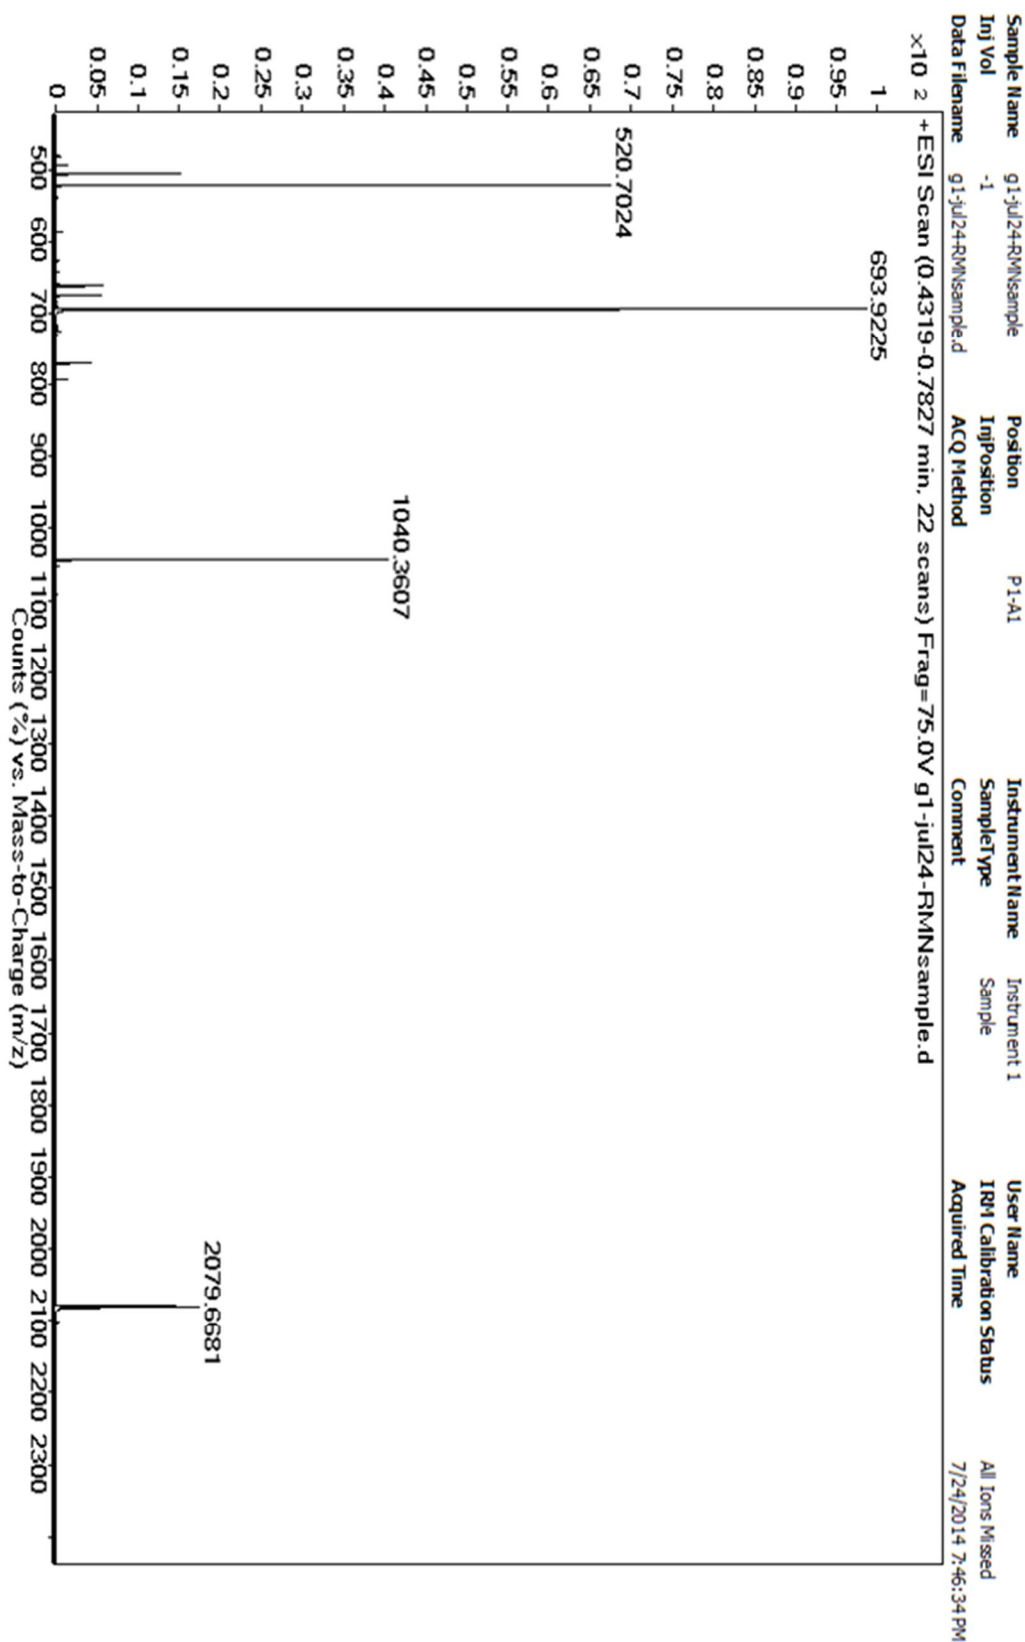



SI Figure 13.  $^1\text{H}$ NMR

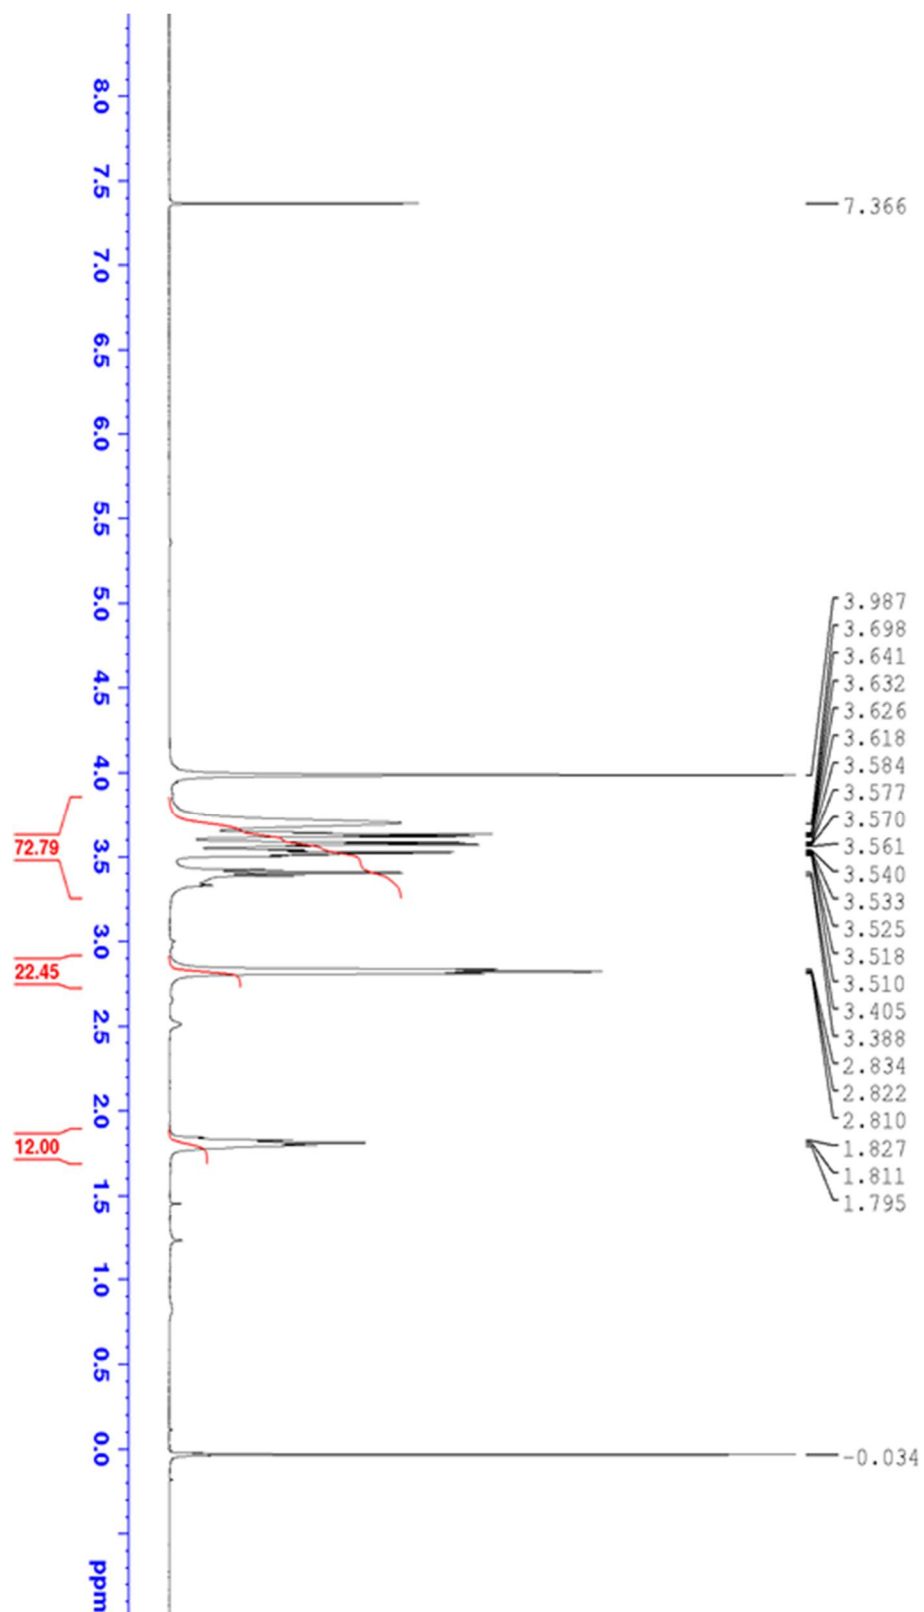

SI Figure 14.  $^{13}\text{C}$ NMR

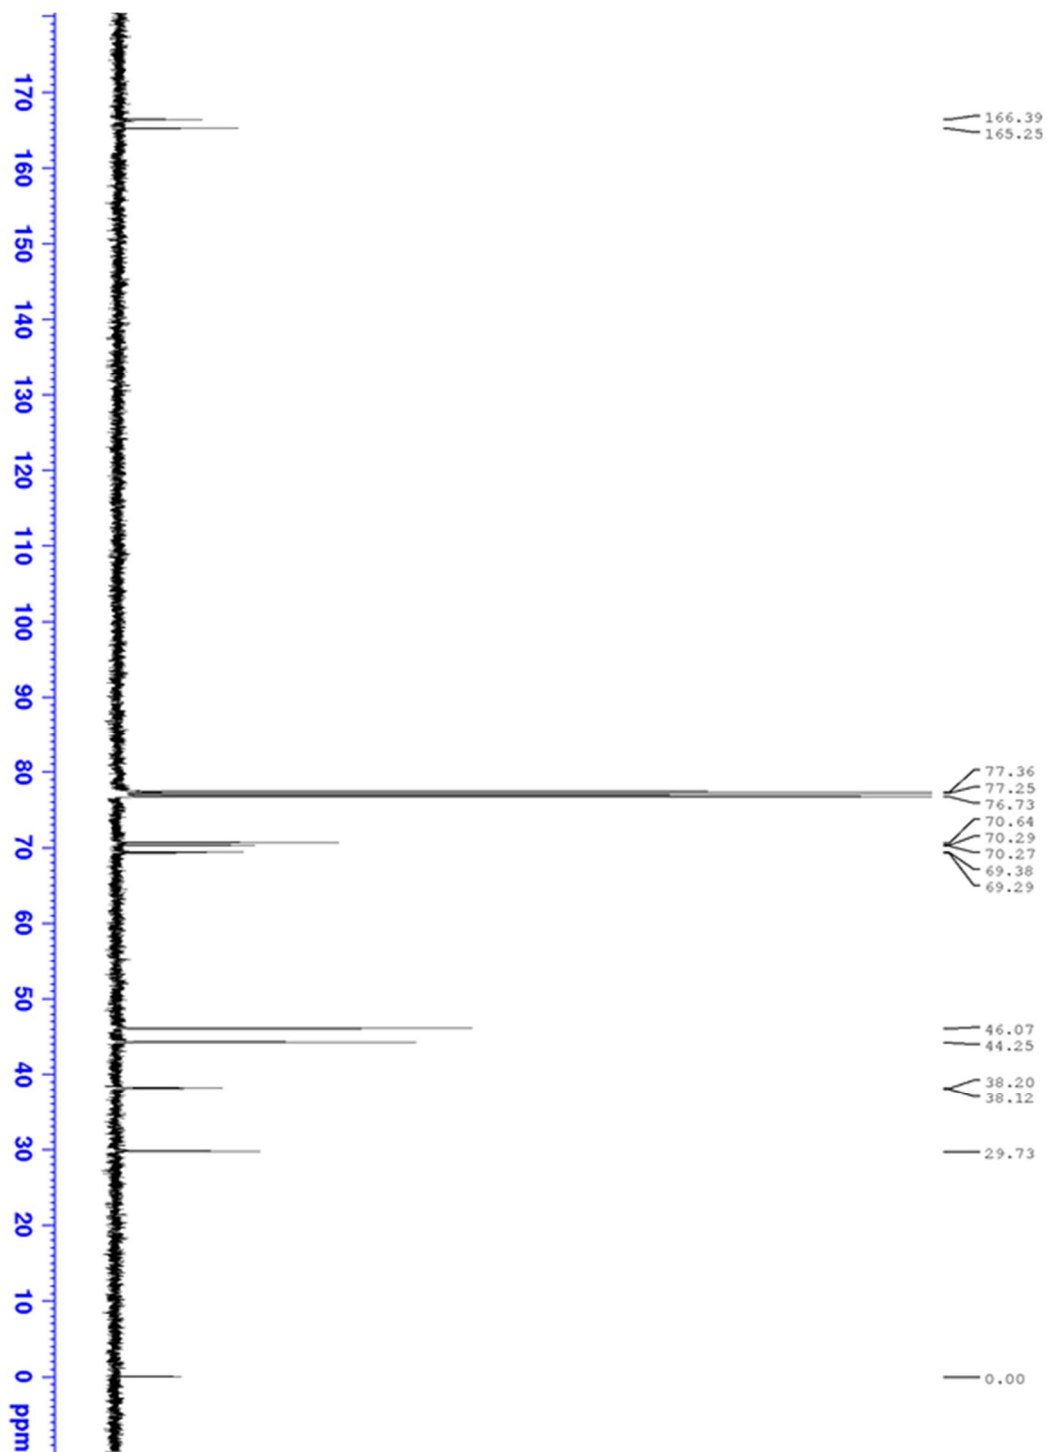

SI Figure 15. Mass Spectra

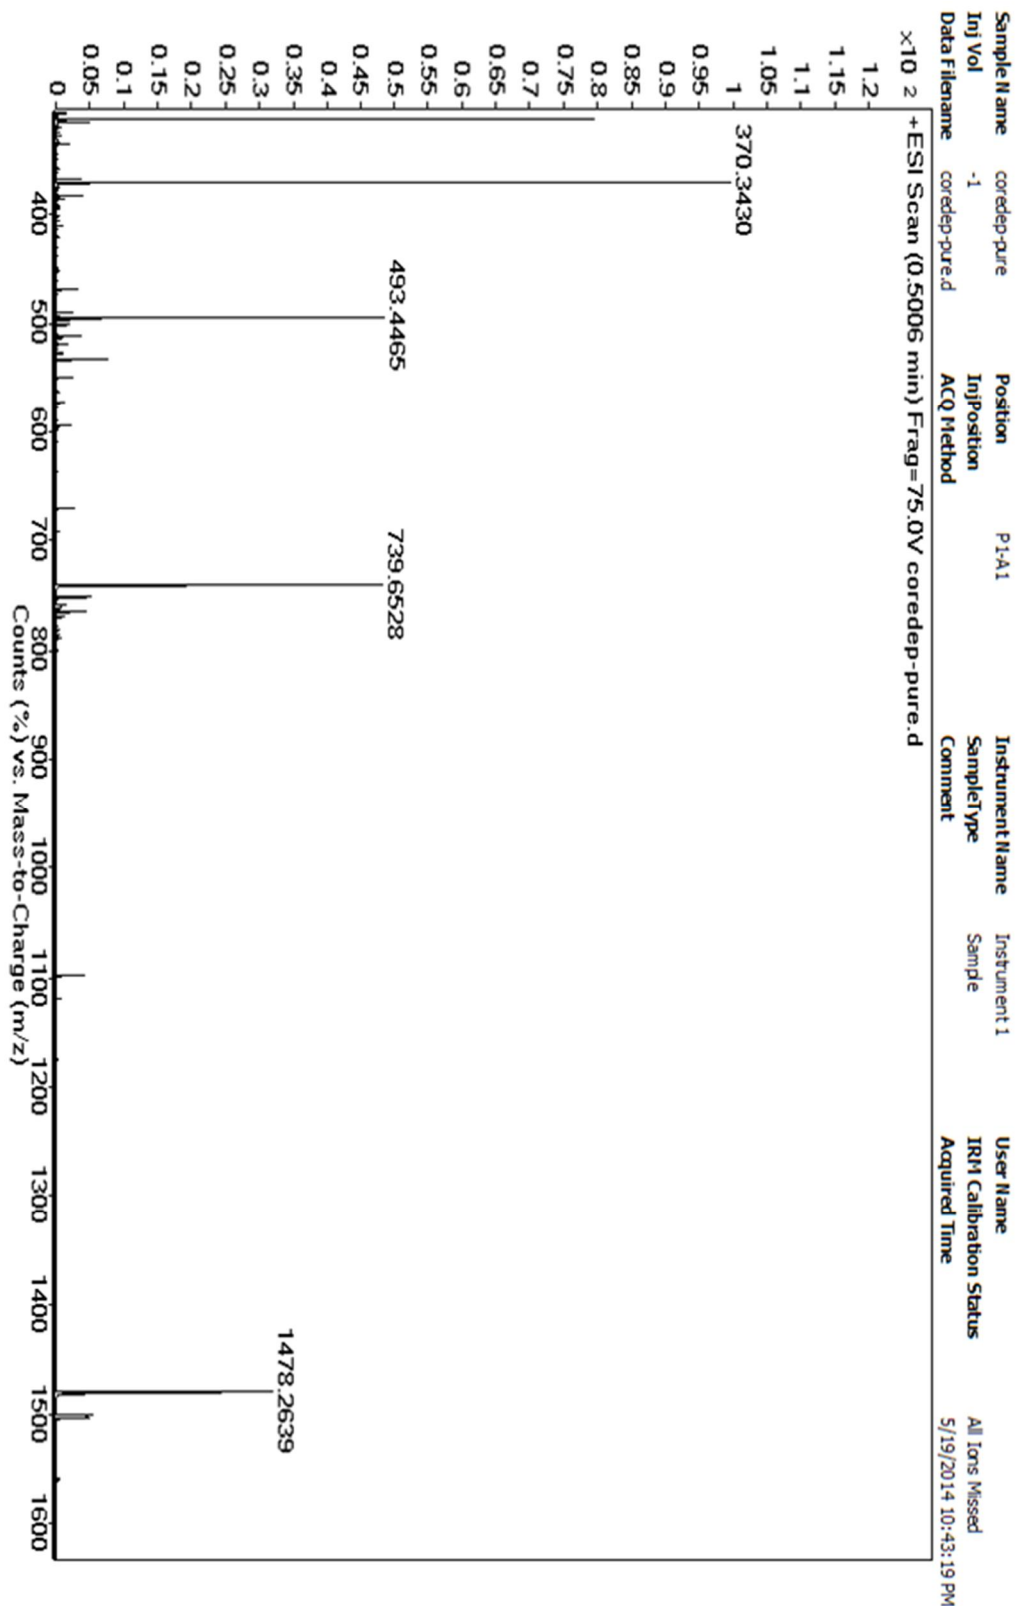

**Compound 6 (G3-Boc).** A solution of **3** (2.35g, 1.624 mmol) with **5** (0.200g, 0.135 mmol) and DIPEA (0.42mL, 2.44 mmol) in 4mL of 1,4 dioxane and 0.5mL MeOH was stirred for 2 minutes. Then, the solution was irradiated in the microwave while stirring for 4 hours at 95°C using dynamic mode and then evaporated under vacuum. The residue was dissolved in dichloromethane, washed with brine solution and dried over MgSO<sub>4</sub>, filtered, and evaporated under vacuum. The crude was purified by automated chromatography. The solvent system (in column volumes) used was the following: 5CV (99:1= EtoAc:MeOH), 5CV (98:2= EtoAc:MeOH), 5CV (100% DCM) to give **6** (1.1g, 82%) as a white solid. <sup>1</sup>H NMR (400 MHz, CDCl<sub>3</sub>) δ 3.72 (br, 144H, NCH<sub>2</sub>CH<sub>2</sub>NBoc, NCH<sub>2</sub>CH<sub>2</sub>N), 3.66-3.53 (m, 180H, CH<sub>2</sub>OCH<sub>2</sub>CH<sub>2</sub>OCH<sub>2</sub>CH<sub>2</sub>OCH<sub>2</sub>), 3.45 (br, 156H, C<sub>3</sub>N<sub>3</sub>-NHCH<sub>2</sub>CH<sub>2</sub>CH<sub>2</sub>O, BocNCH<sub>2</sub>CH<sub>2</sub>N), 1.86 (m, 60H, OCH<sub>2</sub>CH<sub>2</sub>CH<sub>2</sub>NH), 1.47 (s, 216H, C(CH<sub>3</sub>)<sub>3</sub>); <sup>13</sup>C NMR (100 MHz, CDCl<sub>3</sub>) δ 166.3, 165.26 (C<sub>3</sub>N<sub>3</sub>), 154.8 (CO), 79.8 (C(CH<sub>3</sub>)<sub>3</sub>), 70.6 (OCH<sub>2</sub>CH<sub>2</sub>O), 70.2 (two lines, OCH<sub>2</sub>CH<sub>2</sub>O), 69.3 (two lines, NHCH<sub>2</sub>CH<sub>2</sub>CH<sub>2</sub>O), 42.9 (piperazine), 38.2 (NHCH<sub>2</sub>CH<sub>2</sub>CH<sub>2</sub>O), 38.1 (NHCH<sub>2</sub>CH<sub>2</sub>CH<sub>2</sub>O), 29.6 (NHCH<sub>2</sub>CH<sub>2</sub>CH<sub>2</sub>O), 28.4 (C(CH<sub>3</sub>)<sub>3</sub>); MS (ESI-TOF) calcd for C<sub>456</sub>H<sub>786</sub>N<sub>156</sub>O<sub>93</sub> 9936.16, found 9944.5803 (M + H)<sup>+</sup>.

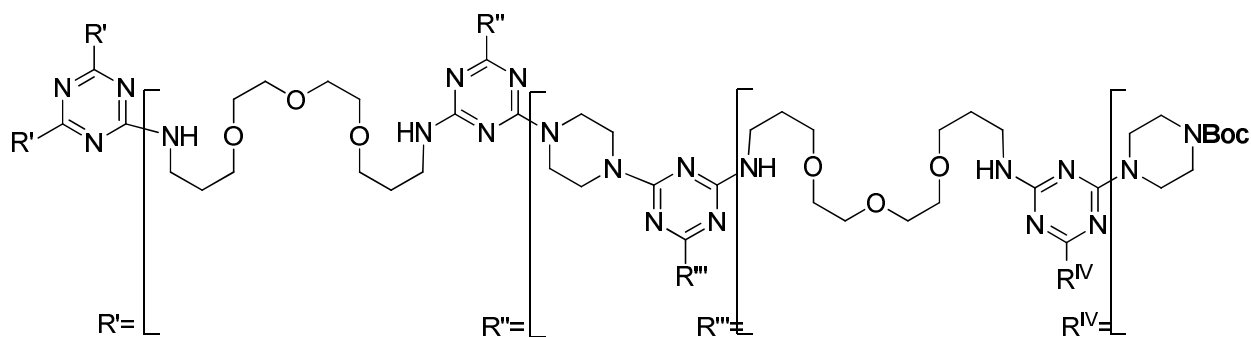



SI Figure 16.  $^1\text{H}$ NMR

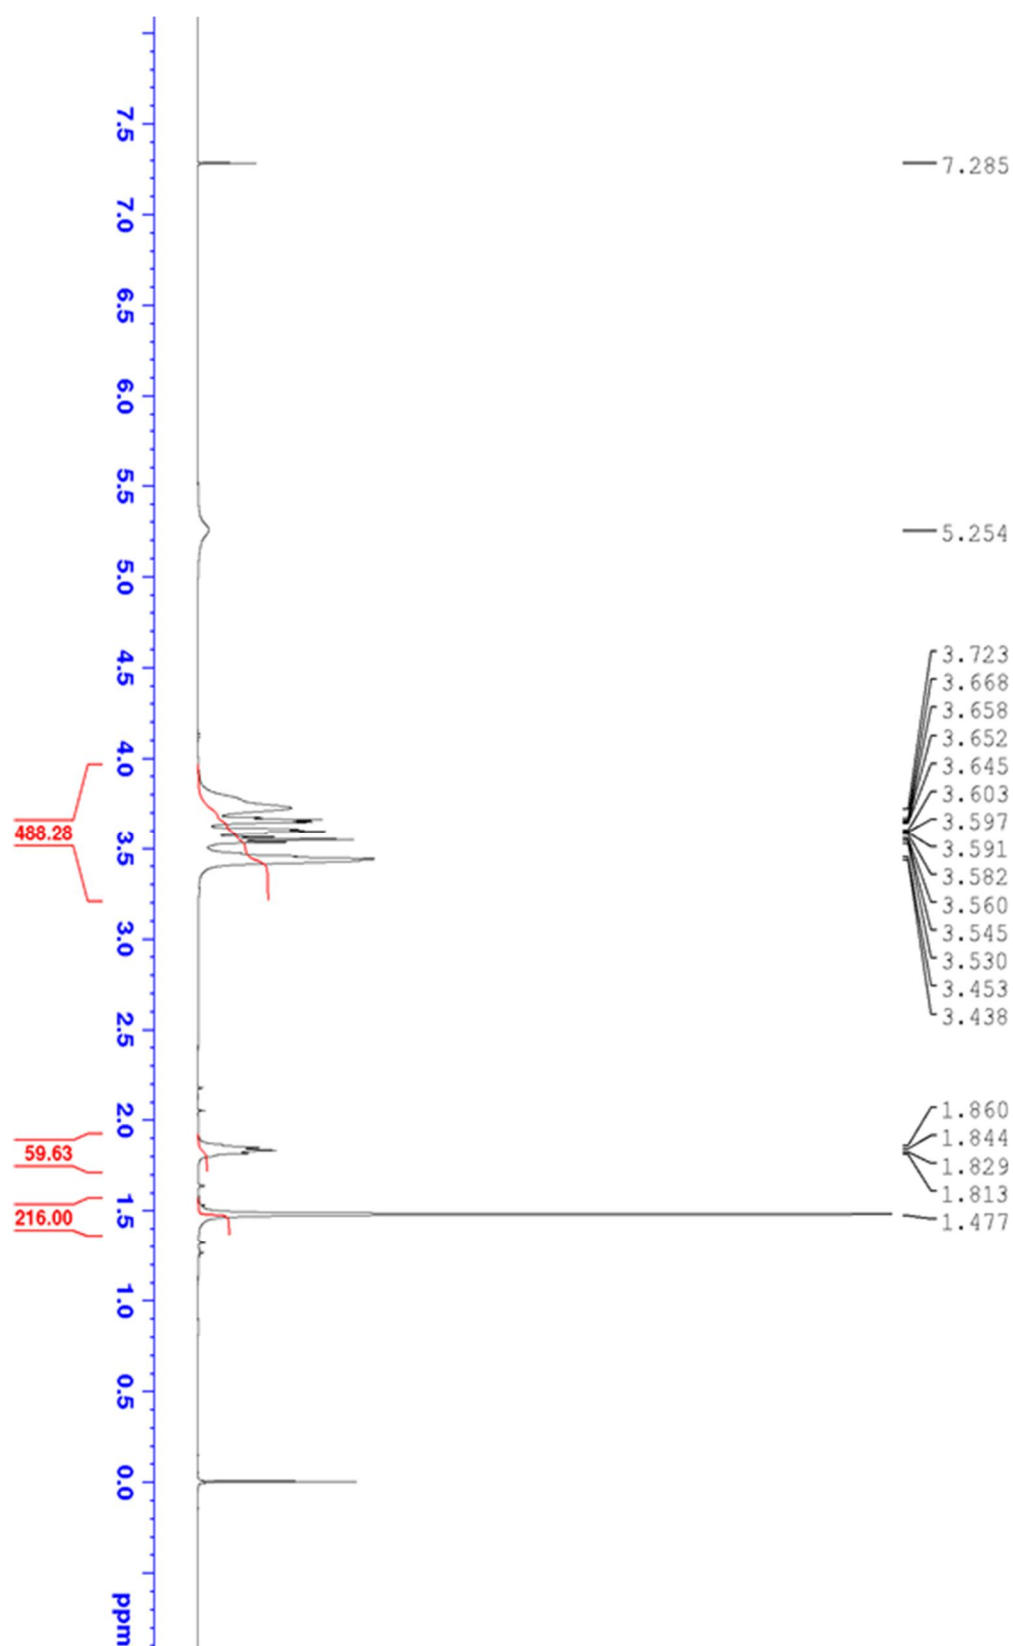

SI Figure 17.  $^{13}\text{C}$ NMR

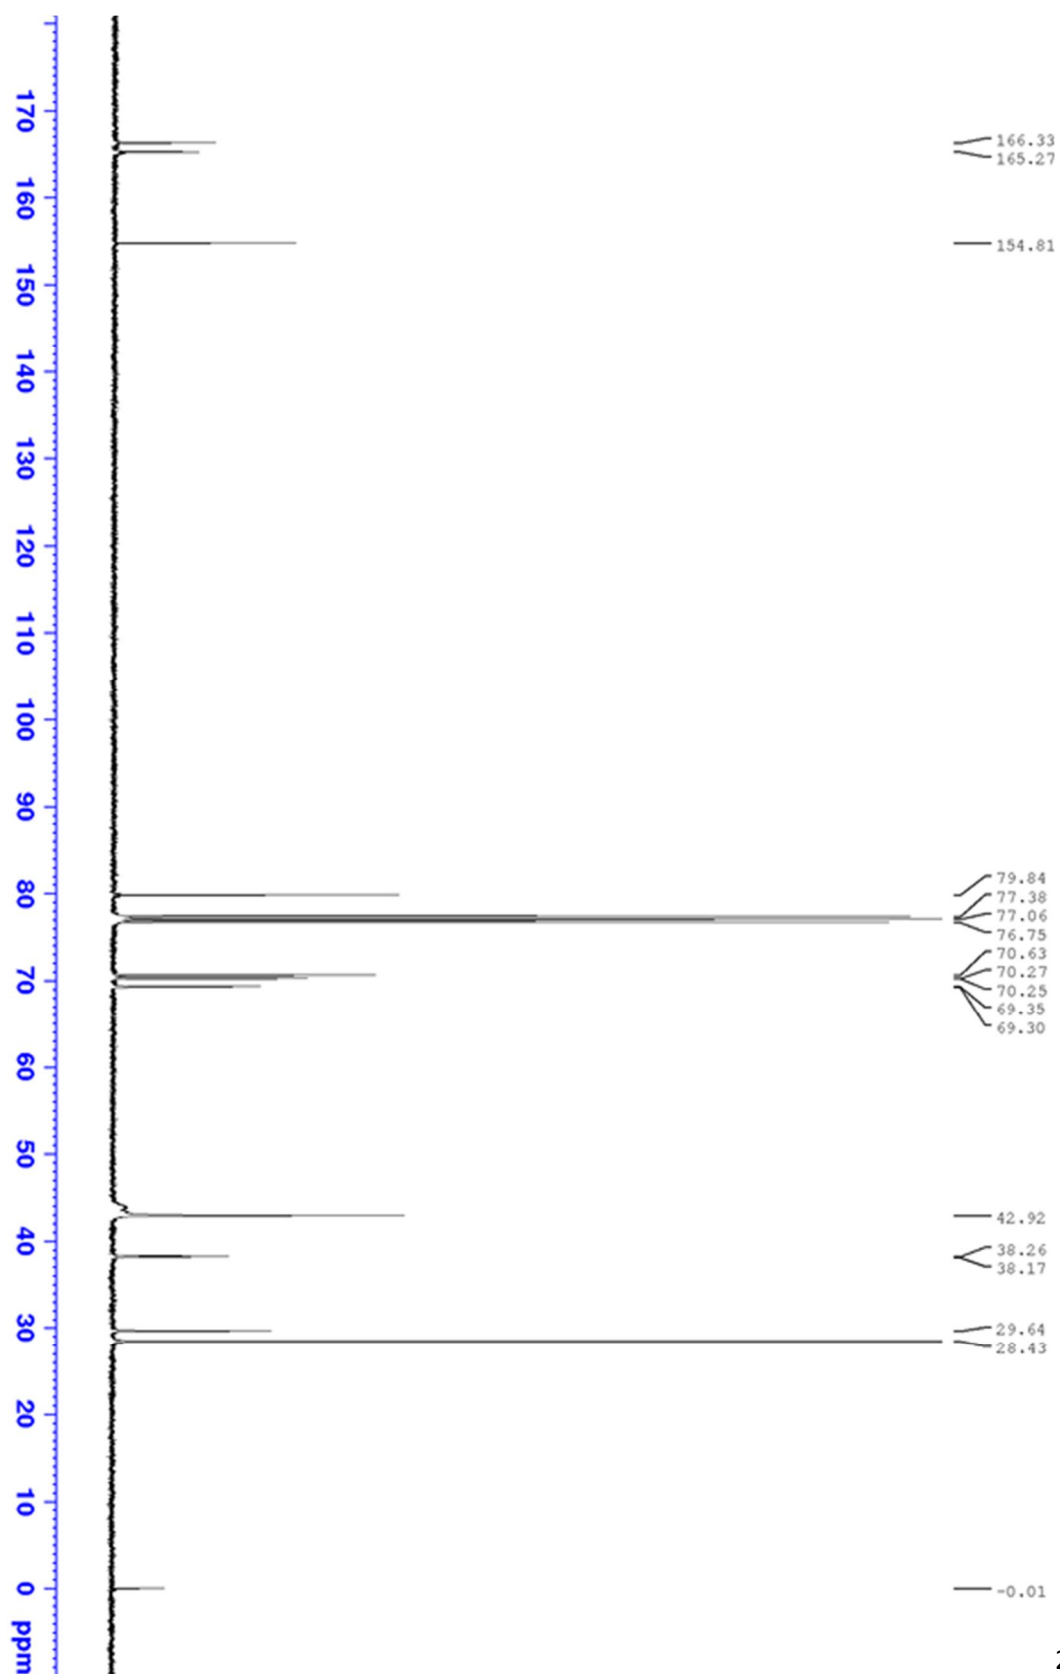

SI Figure 18. Mass Spectra

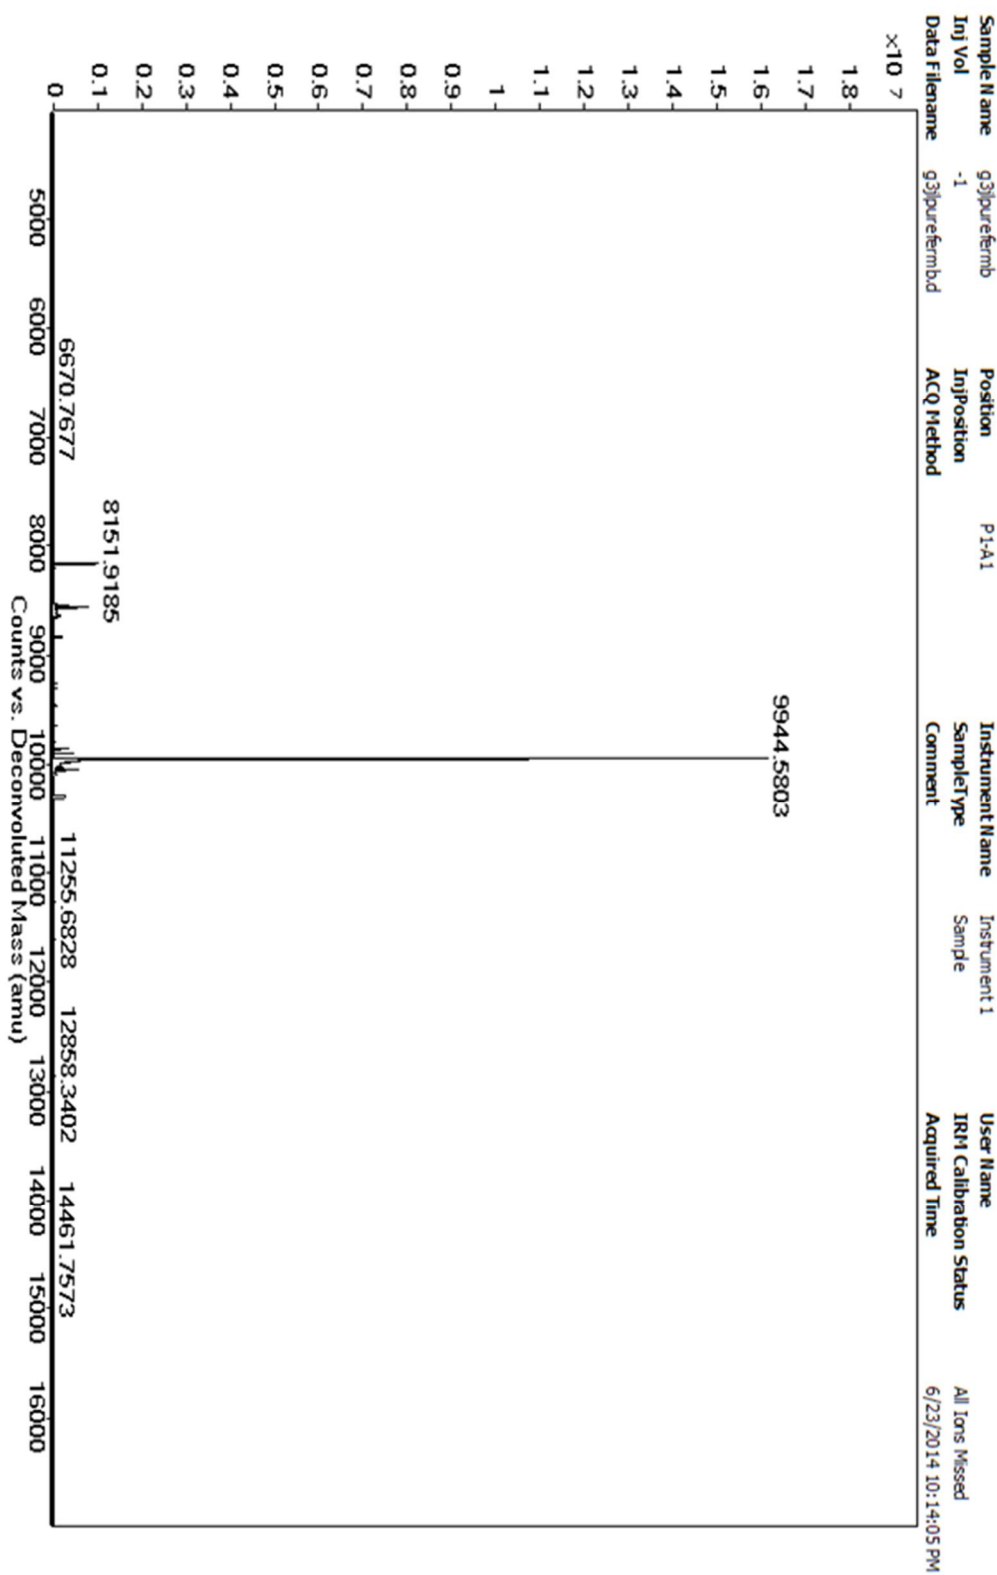

**Compound 7 (G3 deprotected).** A solution of **6** (0.650 g, 65.4  $\mu\text{mol}$ ) in concentrated HCl (3 mL) and dioxane (6 mL) was stirred for 1 min at room temperature and then was irradiated in the microwave while stirring for two periods of 3 minutes at 60°C using dynamic mode and then evaporated with air. The residue was dissolved in dichloromethane, washed with 5 M NaOH (aq), dried over  $\text{MgSO}_4$ , filtered, and evaporated under vacuum to give **7** (0.493 g, quantitative) as a white solid.  $^1\text{H}$  NMR (400 MHz,  $\text{CDCl}_3$ )  $\delta$  3.72 (br, 144H,  $\text{NCH}_2\text{CH}_2\text{NH}$ ,  $\text{NCH}_2\text{CH}_2\text{N}$ ), 3.67-3.53 (m, 180H,  $\text{CH}_2\text{OCH}_2\text{CH}_2\text{OCH}_2\text{CH}_2\text{OCH}_2$ ), 3.47 (br, 60H,  $\text{C}_3\text{N}_3\text{-NHCH}_2\text{CH}_2\text{CH}_2\text{O}$ ), 2.87 (br, 96H,  $\text{HNCH}_2\text{CH}_2\text{N}$ ), 1.85 (m, 60H,  $\text{OCH}_2\text{CH}_2\text{CH}_2\text{NH}$ );  $^{13}\text{C}$  NMR (100 MHz,  $\text{CDCl}_3$ )  $\delta$  166.3, 165.2 ( $\text{C}_3\text{N}_3$ ), 70.6 ( $\text{OCH}_2\text{CH}_2\text{O}$ ), 70.2 ( $\text{OCH}_2\text{CH}_2\text{O}$ ), 69.3 (two lines,  $\text{NHCH}_2\text{CH}_2\text{CH}_2\text{O}$ ), 46.0 ( $\text{NCH}_2\text{CH}_2\text{NH}$ ), 44.2 ( $\text{NCH}_2\text{CH}_2\text{NH}$ ), 43.0 ( $\text{NCH}_2\text{CH}_2\text{N}$ ), 38.1 ( $\text{NHCH}_2\text{CH}_2\text{CH}_2\text{O}$ ), 29.6 ( $\text{NHCH}_2\text{CH}_2\text{CH}_2\text{O}$ ); MS (ESI-TOF) calcd for  $\text{C}_{336}\text{H}_{594}\text{N}_{156}\text{O}_{45}$  7534.90, found 7541.6290 ( $\text{M} + \text{H}$ ) $^+$ .

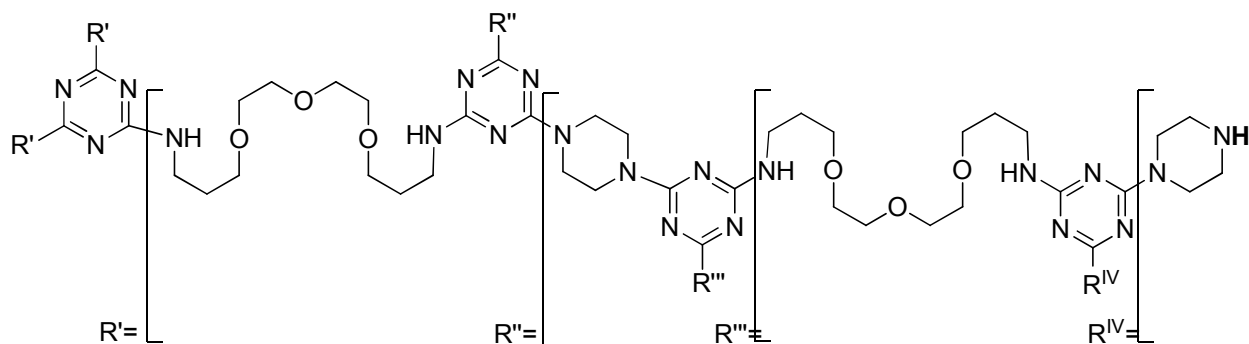

SI Figure 19.  $^1\text{H}$ NMR

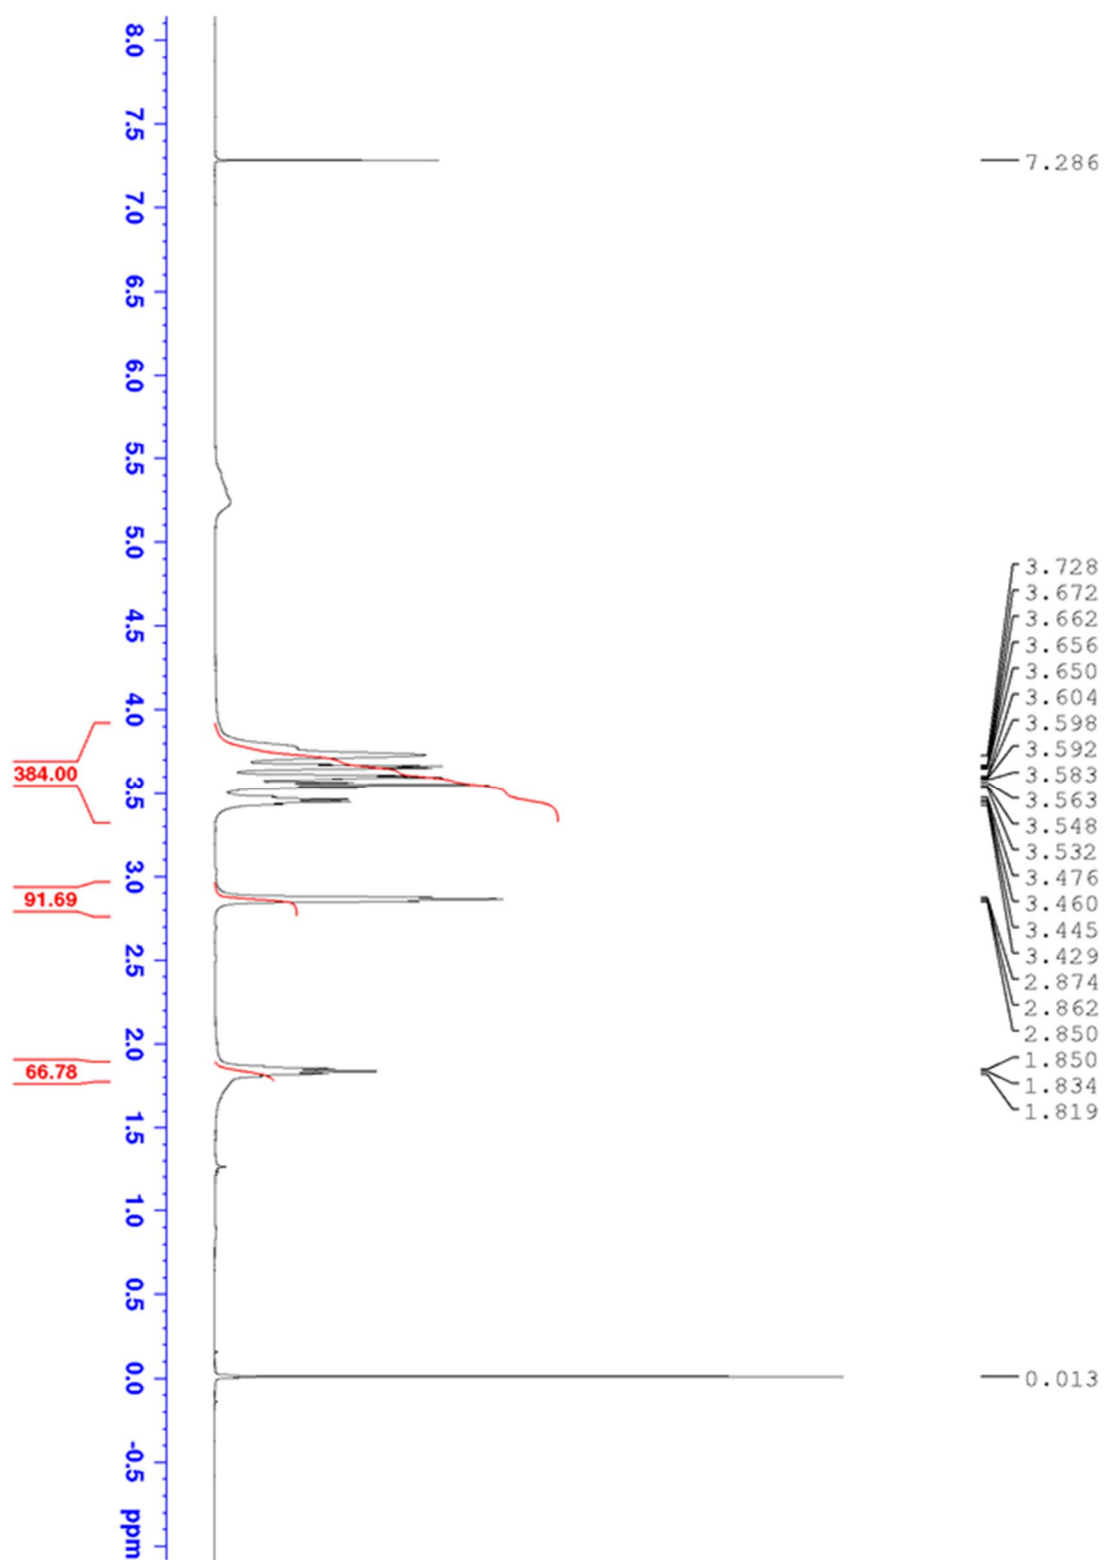

SI Figure 20.  $^{13}\text{C}$ NMR

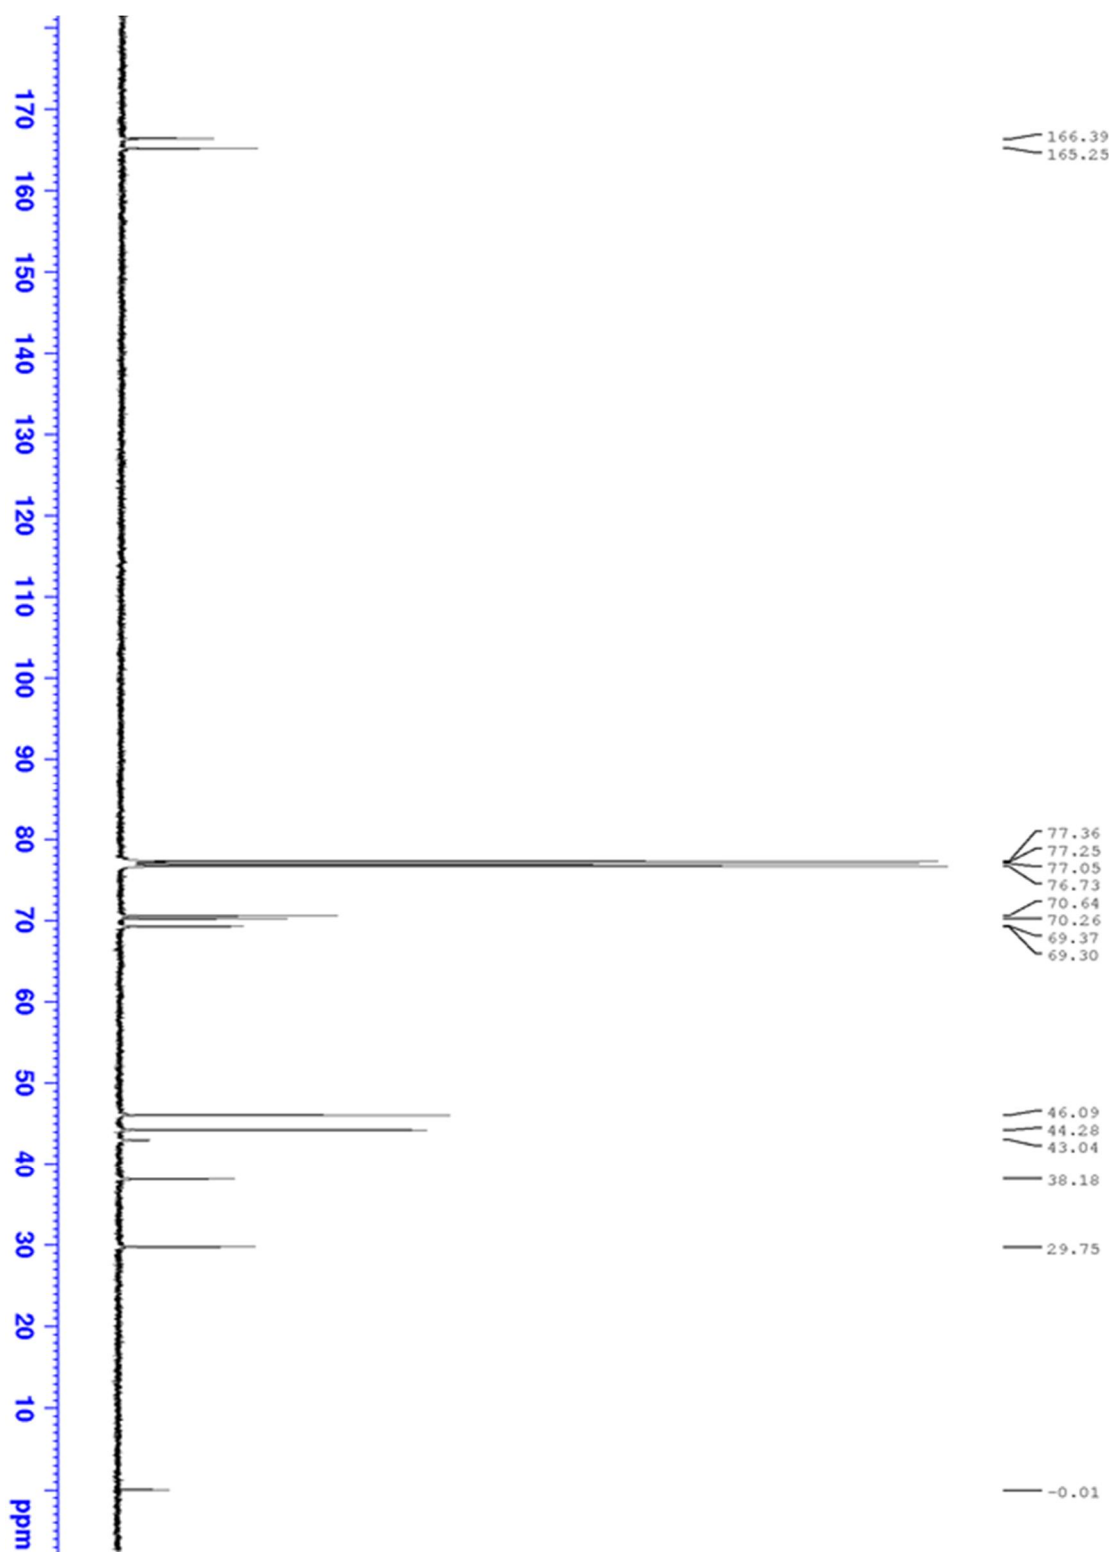

SI Figure 21. Mass Spectra

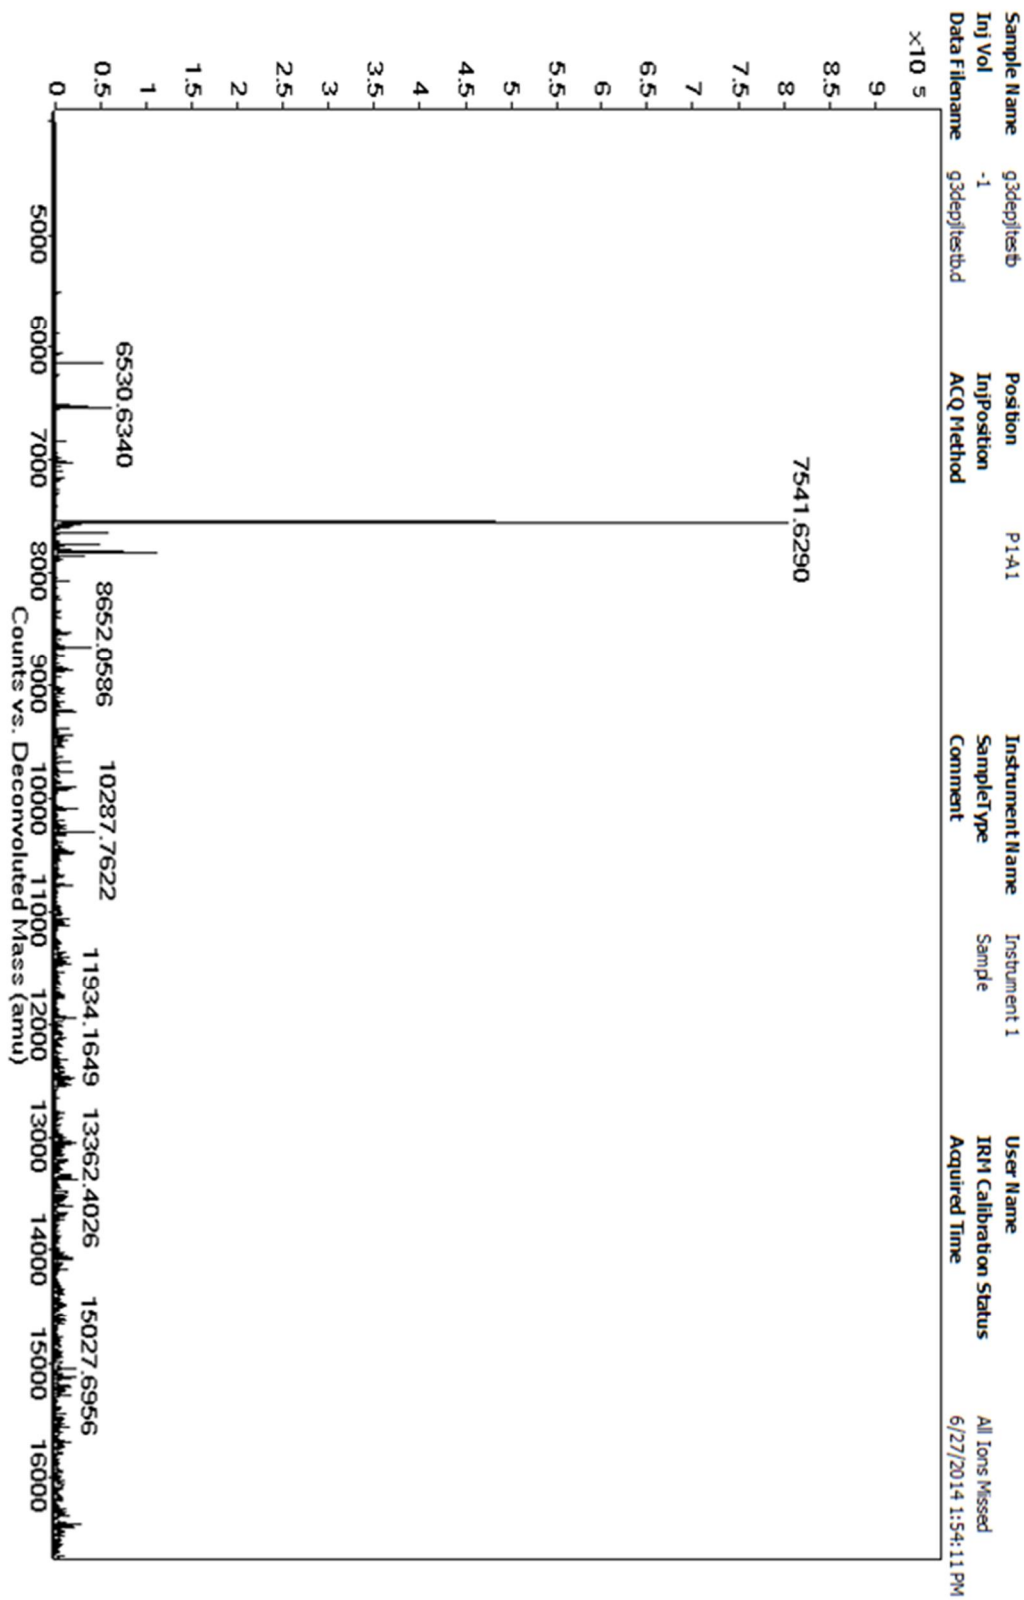

**Compound 8 (G5-Boc).** A solution of **3** (1.84g, 1.274 mmol) with **7** (0.200g, 26.53  $\mu$ mol) and DIPEA (0.33mL, 1.89 mmol) in 6mL of 1,4 dioxane, 0.5mL MeOH and 0.5mL H<sub>2</sub>O was stirred for 2 minutes. Then, the solution was irradiated in the microwave while stirring for 4 hours at 95°C using dynamic mode and then evaporated under vacuum. The residue was dissolved in dichloromethane, washed with brine solution and dried over MgSO<sub>4</sub>, filtered, and evaporated under vacuum. The crude was purified by several washes with a solution of 98:2= EtoEt:MeOH to give **8** (0.76g, 75%) as a white solid. <sup>1</sup>H NMR (400 MHz, CDCl<sub>3</sub>)  $\delta$  3.73 (br, 624H, NCH<sub>2</sub>CH<sub>2</sub>NBoc, NCH<sub>2</sub>CH<sub>2</sub>N), 3.67-3.53 (m, 756H, CH<sub>2</sub>OCH<sub>2</sub>CH<sub>2</sub>OCH<sub>2</sub>CH<sub>2</sub>OCH<sub>2</sub>), 3.44 (br, 636H, C<sub>3</sub>N<sub>3</sub>-NHCH<sub>2</sub>CH<sub>2</sub>CH<sub>2</sub>O, BocNCH<sub>2</sub>CH<sub>2</sub>N), 1.85 (m, 252H, OCH<sub>2</sub>CH<sub>2</sub>CH<sub>2</sub>NH), 1.48 (s, 864H, C(CH<sub>3</sub>)<sub>3</sub>); <sup>13</sup>C NMR (100 MHz, CDCl<sub>3</sub>)  $\delta$  166.3, 165.2, 165.1 (C<sub>3</sub>N<sub>3</sub>), 154.8 (CO), 79.8 (C(CH<sub>3</sub>)<sub>3</sub>), 70.6 (OCH<sub>2</sub>CH<sub>2</sub>O), 70.2 (two lines, OCH<sub>2</sub>CH<sub>2</sub>O), 69.3 (two lines, NHCH<sub>2</sub>CH<sub>2</sub>CH<sub>2</sub>O), 42.9 (piperazine), 38.2 (NHCH<sub>2</sub>CH<sub>2</sub>CH<sub>2</sub>O), 38.1 (NHCH<sub>2</sub>CH<sub>2</sub>CH<sub>2</sub>O), 29.6 (two lines, NHCH<sub>2</sub>CH<sub>2</sub>CH<sub>2</sub>O), 28.4 (C(CH<sub>3</sub>)<sub>3</sub>); MS (ESI-TOF) calcd for C<sub>1896</sub>H<sub>3258</sub>N<sub>660</sub>O<sub>381</sub> 41371.59, found 41404.7224 (M + H)<sup>+</sup>.

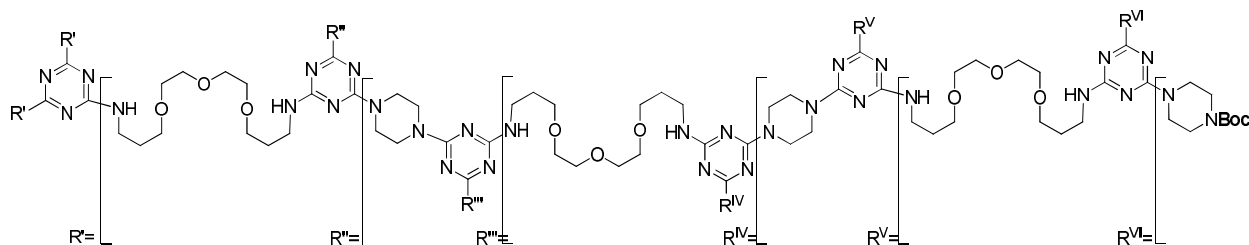



SI Figure 22.  $^1\text{H}$ NMR

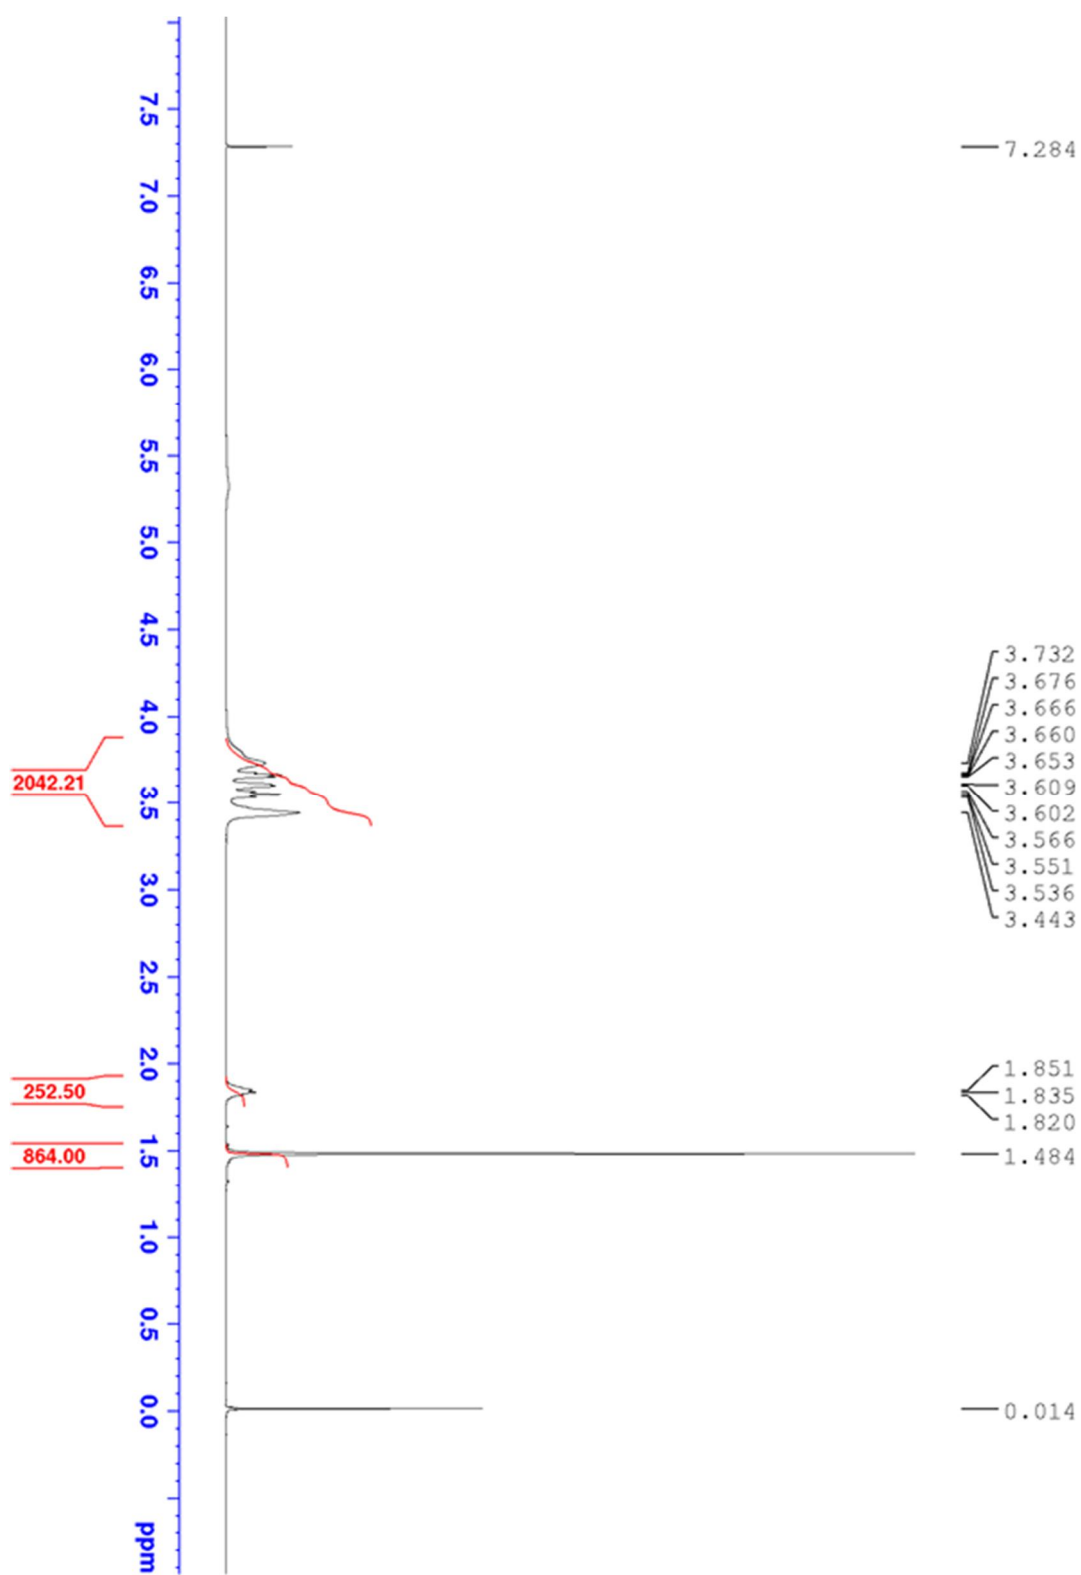

SI Figure 23.  $^{13}\text{C}$ NMR

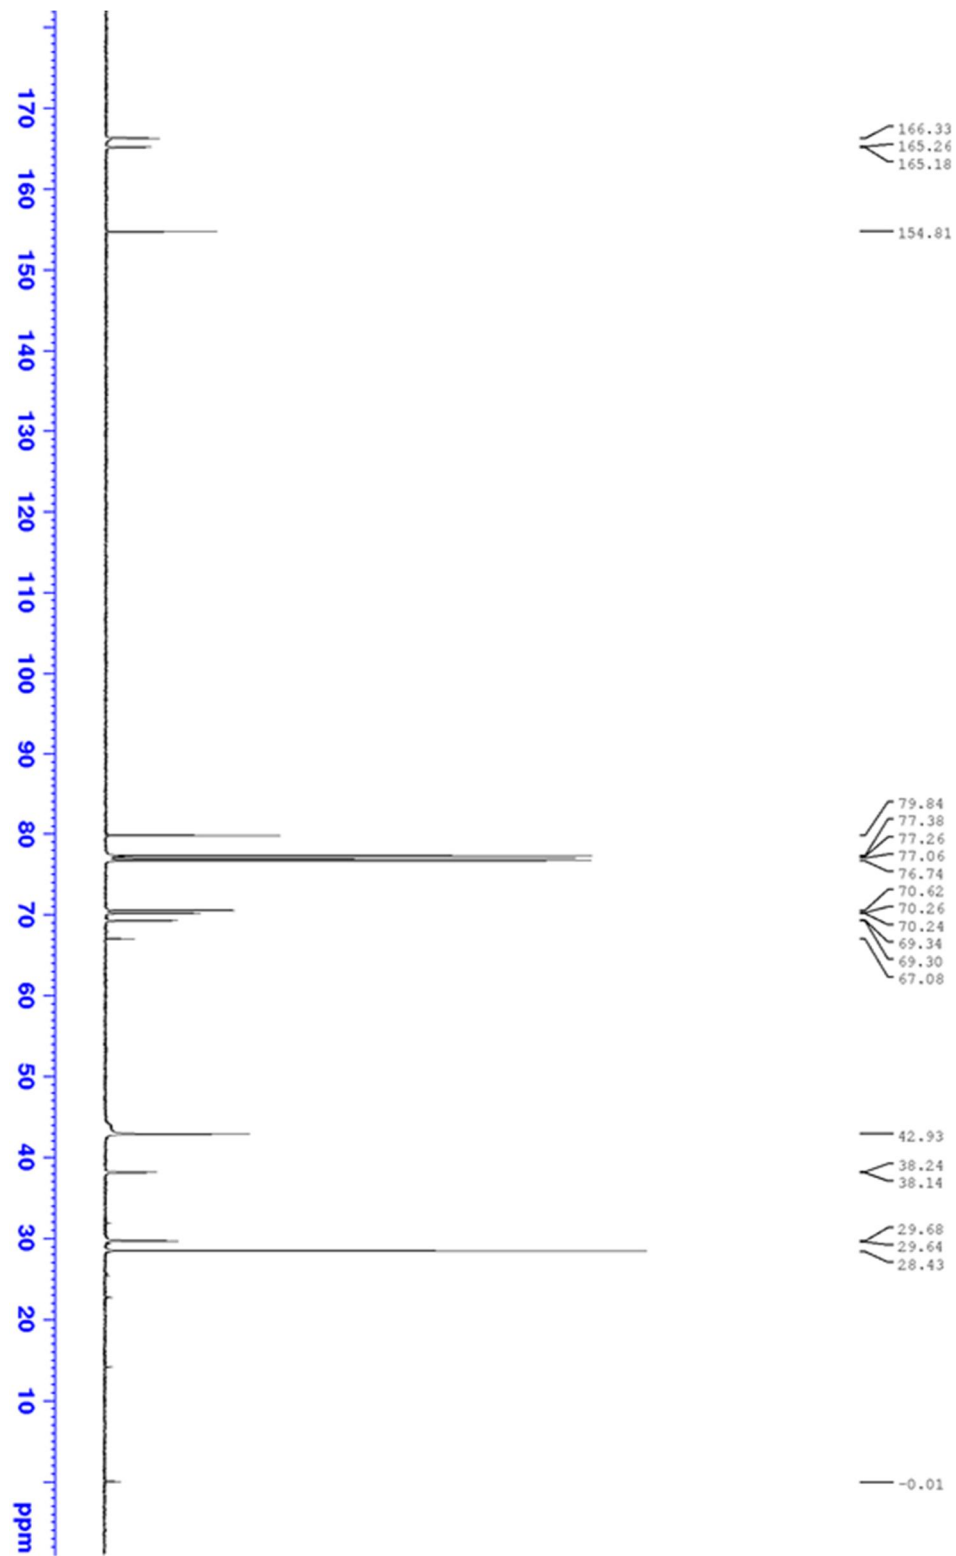

SI Figure 24. Mass Spectra

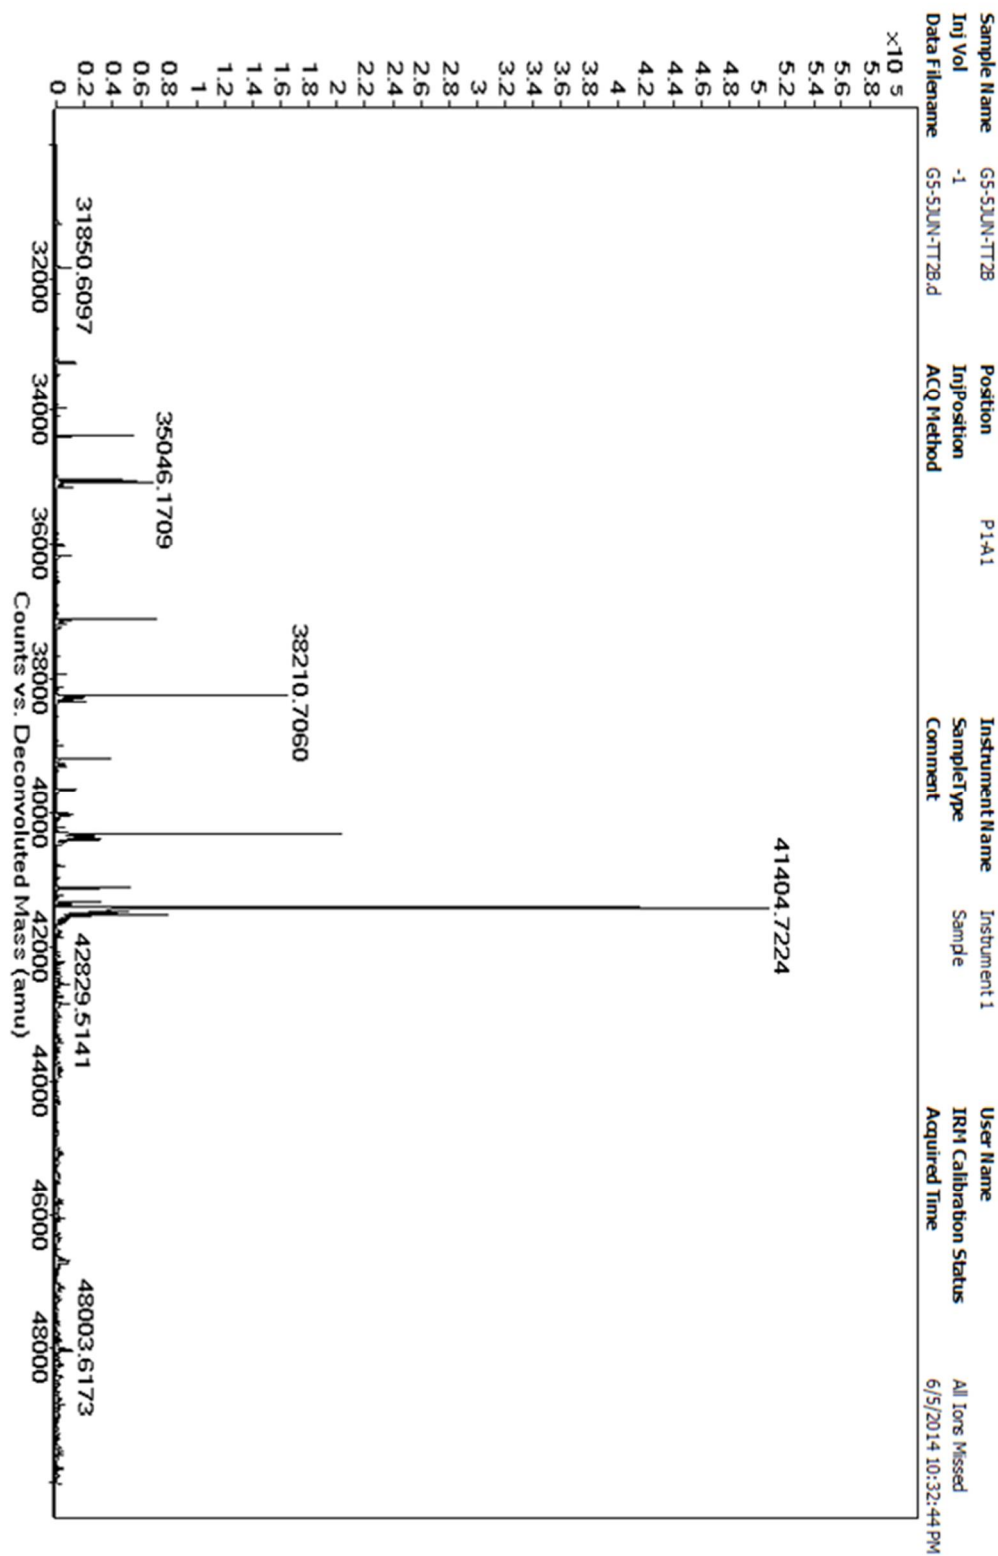

**Compound 9 (G5 deprotected).** A solution of **8** (0.400 g, 9.67  $\mu$ mol) in concentrated HCl (2 mL) and dioxane (4 mL) was stirred for 1 min at room temperature and then was irradiated in the microwave while stirring for three periods of 3 minutes at 60°C using dynamic mode and then evaporated with air. The residue was dissolved in dichloromethane, washed with 5 M NaOH (aq), dried over MgSO<sub>4</sub>, filtered, and evaporated under vacuum to give **9** (0.307g, quantitative) as a white solid. <sup>1</sup>H NMR (400 MHz, CDCl<sub>3</sub>)  $\delta$  3.68 (br, 624H, NCH<sub>2</sub>CH<sub>2</sub>NH, NCH<sub>2</sub>CH<sub>2</sub>N), 3.62-3.49 (br m, 756H, CH<sub>2</sub>OCH<sub>2</sub>CH<sub>2</sub>OCH<sub>2</sub>CH<sub>2</sub>OCH<sub>2</sub>), 3.40 (br, 252H, C<sub>3</sub>N<sub>3</sub>-NHCH<sub>2</sub>CH<sub>2</sub>CH<sub>2</sub>O), 2.81 (br m, 384H, HNCH<sub>2</sub>CH<sub>2</sub>N), 1.80 (m, 252H, OCH<sub>2</sub>CH<sub>2</sub>CH<sub>2</sub>NH); <sup>13</sup>C NMR (100 MHz, CDCl<sub>3</sub>)  $\delta$  166.3, 165.2 (C<sub>3</sub>N<sub>3</sub>), 70.6 (OCH<sub>2</sub>CH<sub>2</sub>O), 70.2 (OCH<sub>2</sub>CH<sub>2</sub>O), 69.3 (NHCH<sub>2</sub>CH<sub>2</sub>CH<sub>2</sub>O), 69.2 (NHCH<sub>2</sub>CH<sub>2</sub>CH<sub>2</sub>O), 46.0 (NCH<sub>2</sub>CH<sub>2</sub>NH), 44.2 (NCH<sub>2</sub>CH<sub>2</sub>NH), 43.0 (NCH<sub>2</sub>CH<sub>2</sub>N), 38.1 (NHCH<sub>2</sub>CH<sub>2</sub>CH<sub>2</sub>O), 29.6 (NHCH<sub>2</sub>CH<sub>2</sub>CH<sub>2</sub>O); MS (ESI-TOF) calcd for C<sub>1416</sub>H<sub>2490</sub>N<sub>660</sub>O<sub>189</sub> 31766.55, found 31792.1374 (M + H)<sup>+</sup>.

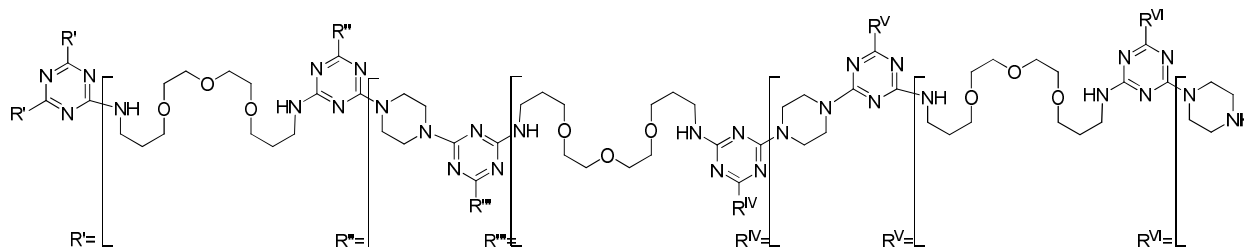

SI Figure 25.  $^1\text{H}$ NMR

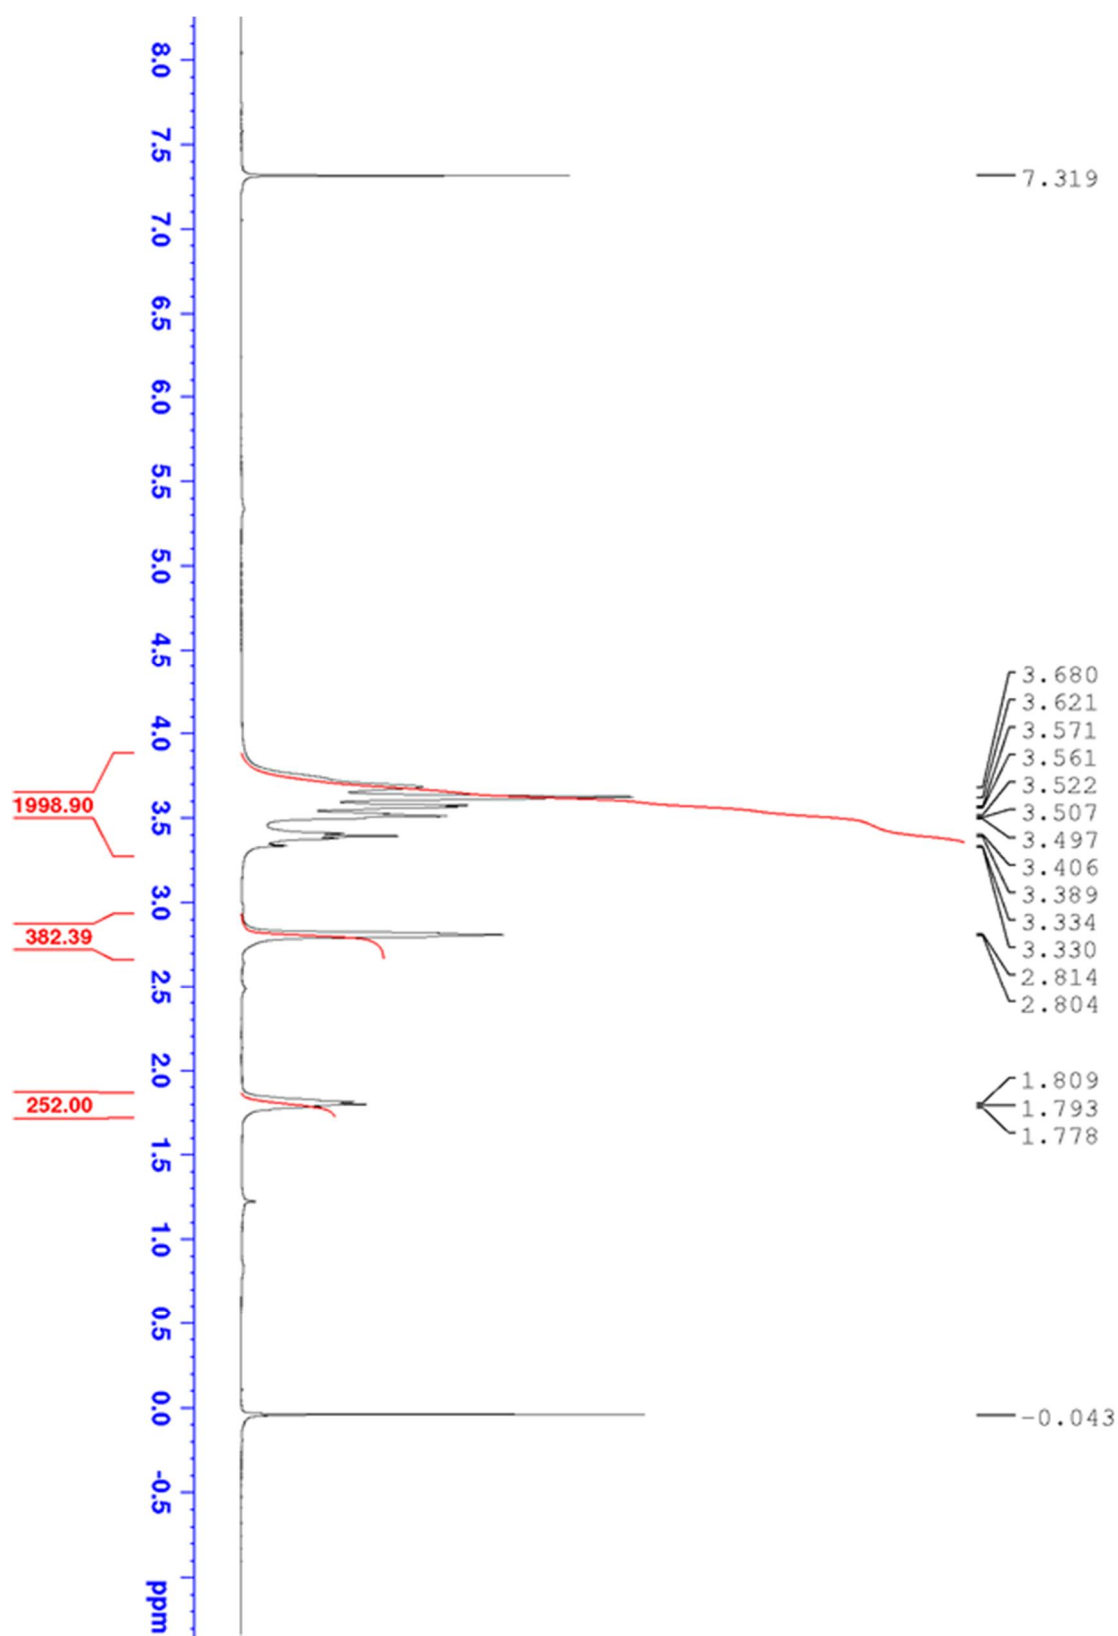

SI Figure 26.  $^{13}\text{C}$ NMR

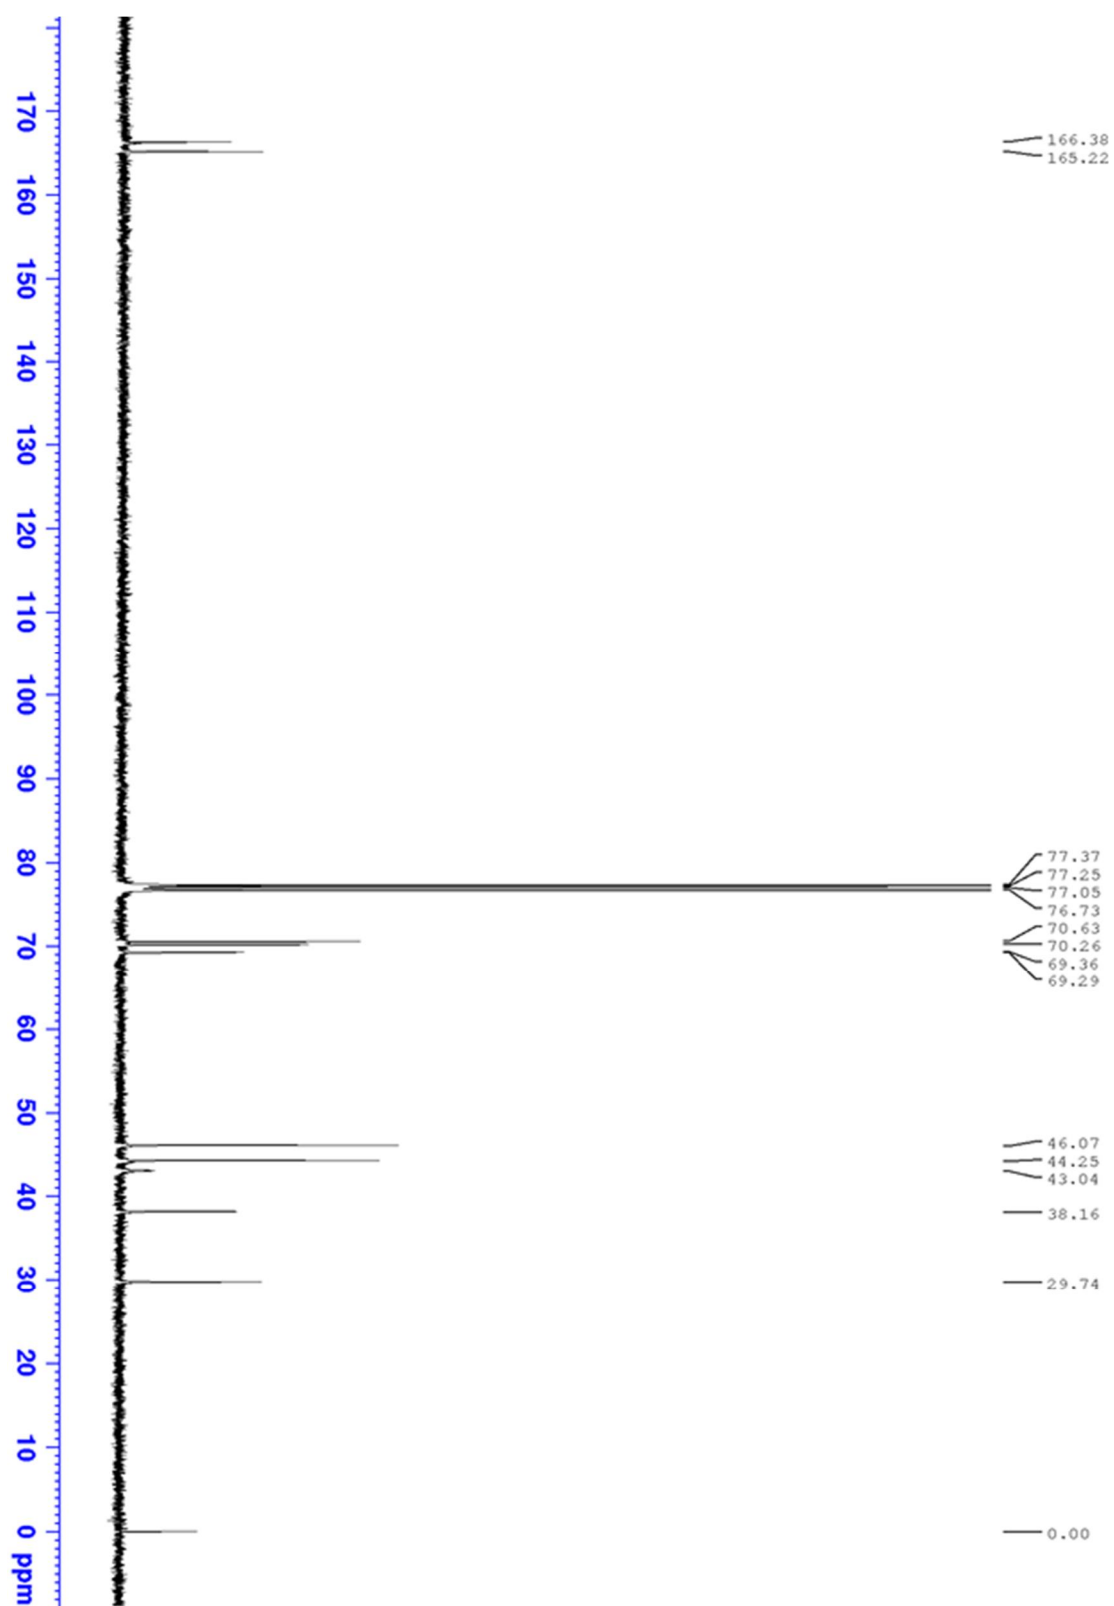

SI Figure 27. Mass Spectra

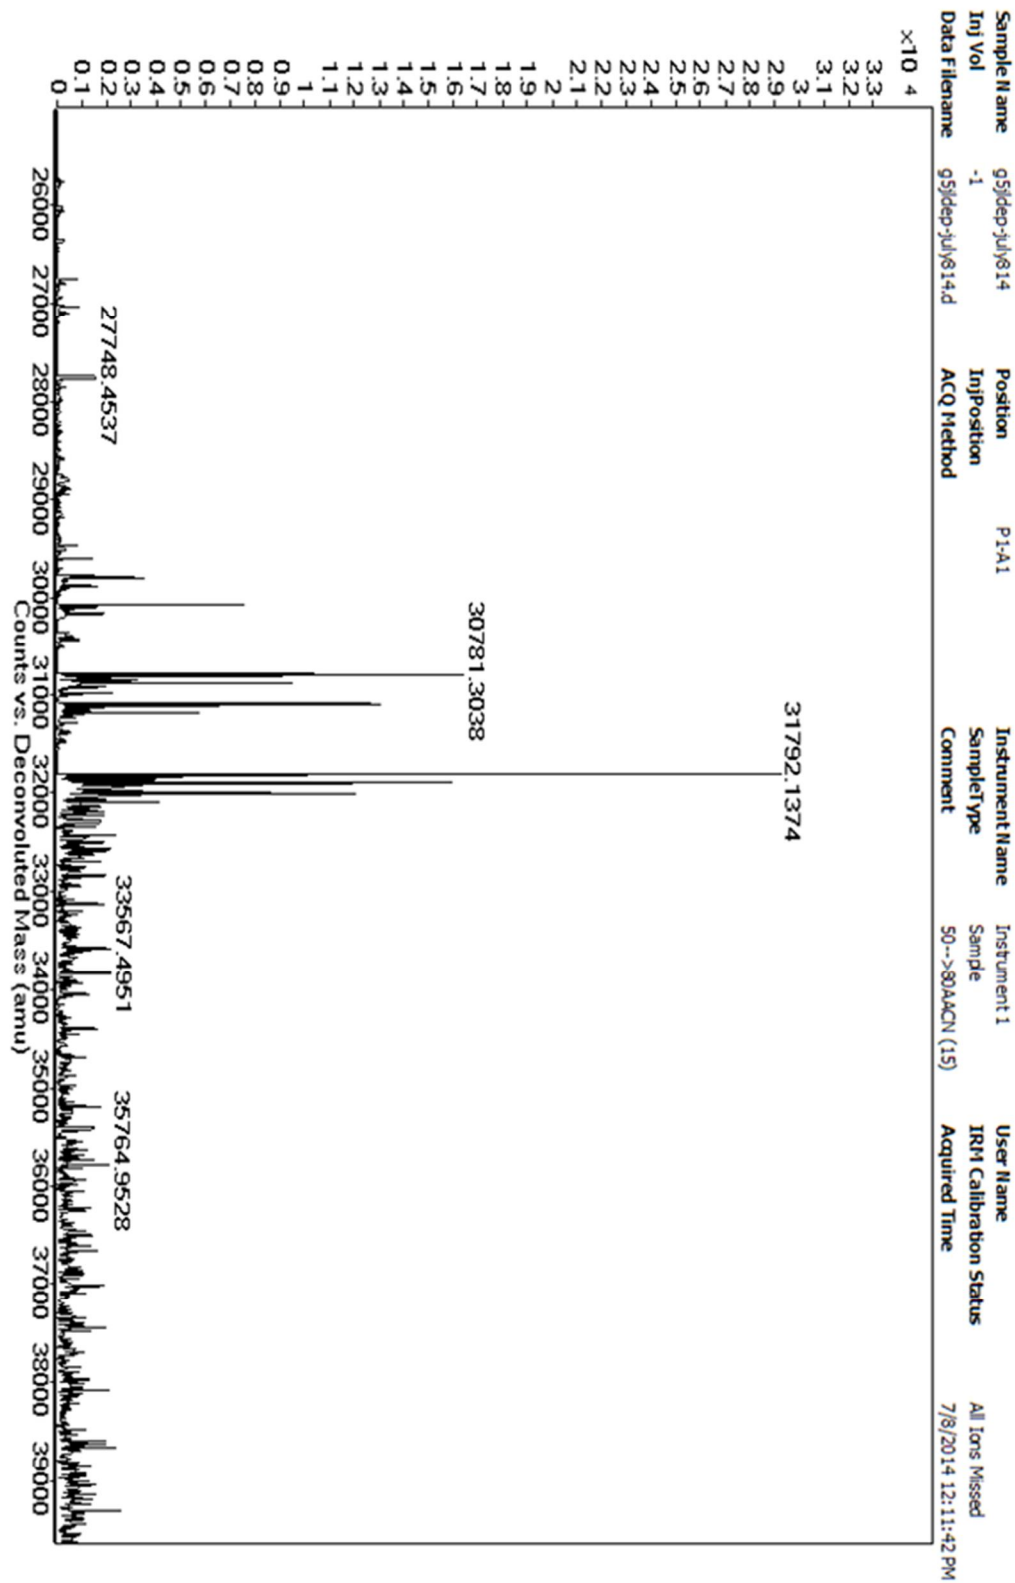

**Compound 10 (G7-Boc).** A solution of **3** (1.75g, 1.2 mmol) with **9** (0.200g, 6.3  $\mu$ mol) and DIPEA (0.33mL, 1.89 mmol) in 7mL of 1,4 dioxane, 1mL MeOH and 0.5mL H<sub>2</sub>O was stirred for 2 minutes. Then, the solution was irradiated in the microwave while stirring for 6 hours at 95°C using dynamic mode and then evaporated under vacuum. The residue was dissolved in dichloromethane, washed with brine solution and dried over MgSO<sub>4</sub>, filtered, and evaporated under vacuum. The crude was purified by several washes with a solution of 97:3= EtoEt:MeOH to give **10** (0.850g, 81%) as a white solid. <sup>1</sup>H NMR (400 MHz, CDCl<sub>3</sub>)  $\delta$  3.73 (br, 2544H, NCH<sub>2</sub>CH<sub>2</sub>NBoc, NCH<sub>2</sub>CH<sub>2</sub>N), 3.65-3.52 (m, 3060H, CH<sub>2</sub>OCH<sub>2</sub>CH<sub>2</sub>OCH<sub>2</sub>CH<sub>2</sub>OCH<sub>2</sub>), 3.43 (br, 2556H, C<sub>3</sub>N<sub>3</sub>-NHCH<sub>2</sub>CH<sub>2</sub>CH<sub>2</sub>O, BocNCH<sub>2</sub>CH<sub>2</sub>N), 1.84 (m, 1020H, OCH<sub>2</sub>CH<sub>2</sub>CH<sub>2</sub>NH), 1.48 (s, 3456H, C(CH<sub>3</sub>)<sub>3</sub>); <sup>13</sup>C NMR (100 MHz, CDCl<sub>3</sub>)  $\delta$  166.3, 165.2 (C<sub>3</sub>N<sub>3</sub>), 154.8 (CO), 79.8 (C(CH<sub>3</sub>)<sub>3</sub>), 70.6 (OCH<sub>2</sub>CH<sub>2</sub>O), 70.2 (two lines, OCH<sub>2</sub>CH<sub>2</sub>O), 69.3 (NHCH<sub>2</sub>CH<sub>2</sub>CH<sub>2</sub>O), 69.2 (NHCH<sub>2</sub>CH<sub>2</sub>CH<sub>2</sub>O), 42.9 (piperazine), 38.2 (NHCH<sub>2</sub>CH<sub>2</sub>CH<sub>2</sub>O), 29.6 (NHCH<sub>2</sub>CH<sub>2</sub>CH<sub>2</sub>O), 28.4 (C(CH<sub>3</sub>)<sub>3</sub>); MS (ESI-TOF) calcd for C<sub>7656</sub>H<sub>13146</sub>N<sub>2676</sub>O<sub>1533</sub> 167113.30, not found.

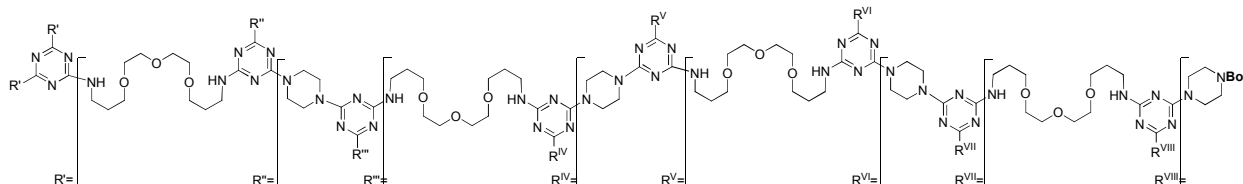



SI Figure 28.  $^1\text{H}$ NMR

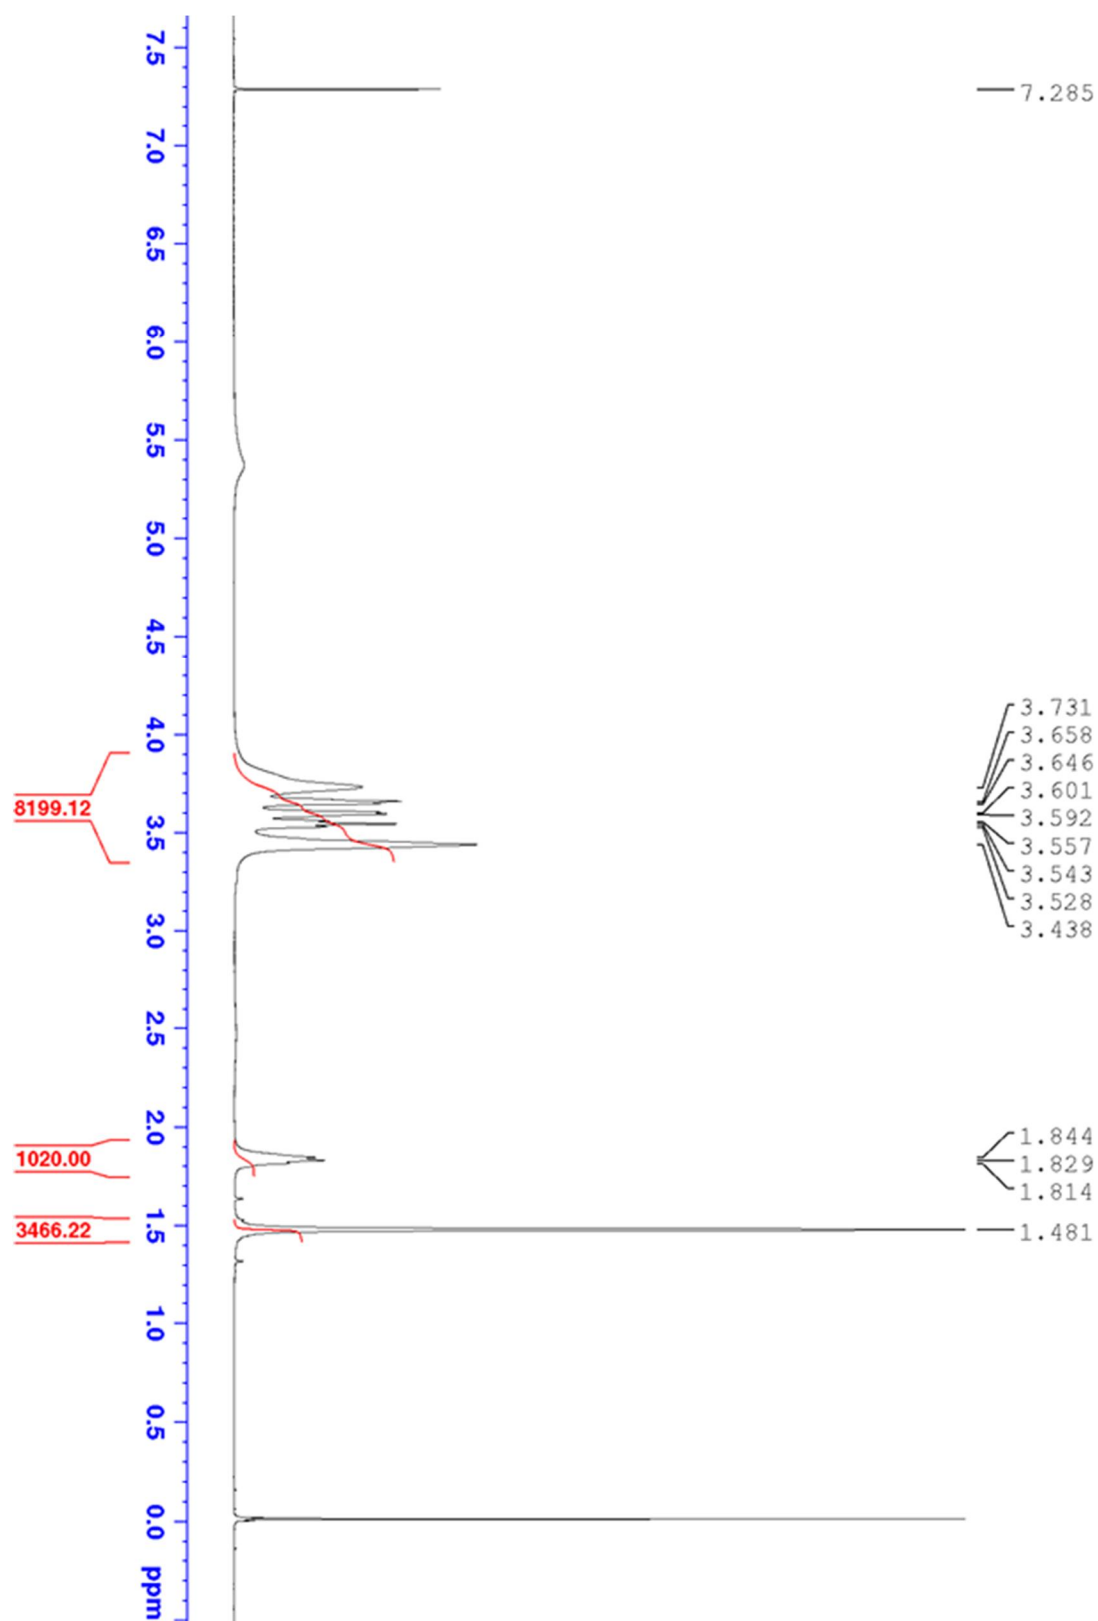

SI Figure 29.  $^{13}\text{C}$ NMR

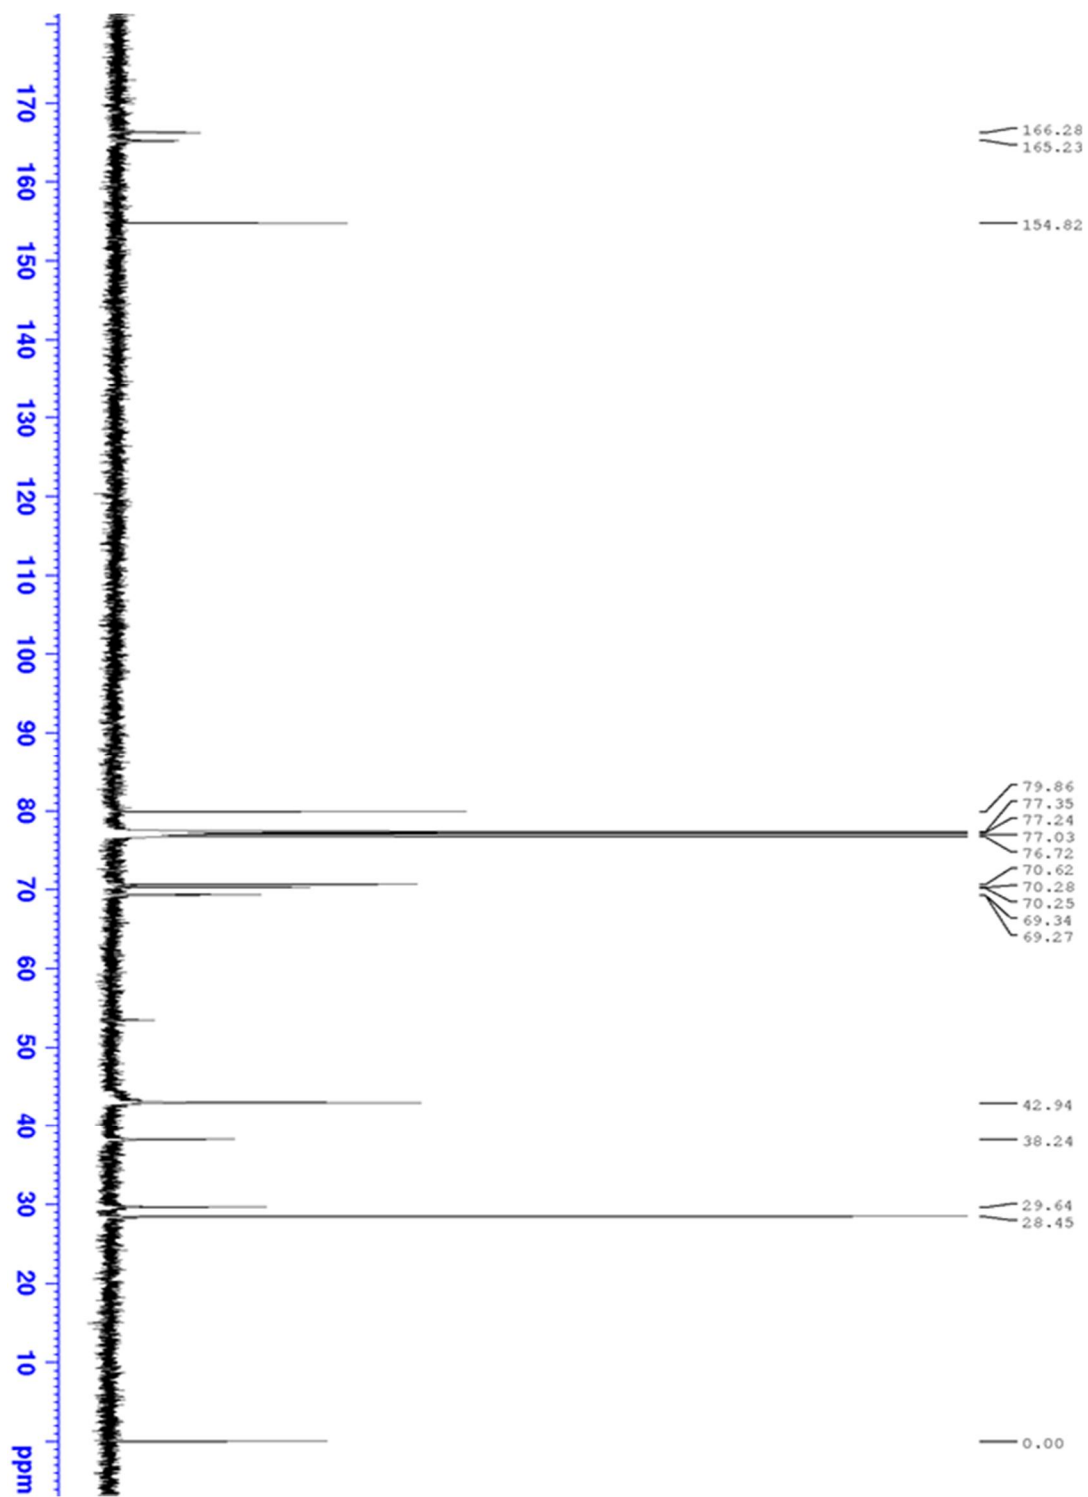

**Compound 11 (G7 deprotected).** A solution of **10** (0.390 g, 2.3  $\mu$ mol) in concentrated HCl (2.5 mL) and dioxane (5 mL) was stirred for 1 min at room temperature and then was irradiated in the microwave while stirring for three periods of 3 minutes at 60°C using dynamic mode and then evaporated with air. The residue was dissolved in dichloromethane, washed with 5 M NaOH (aq), dried over MgSO<sub>4</sub>, filtered, and evaporated under vacuum to give **9** (0.270g, 90%) as a white solid. <sup>1</sup>H NMR (400 MHz, CDCl<sub>3</sub>)  $\delta$  3.71 (br, 2544H, NCH<sub>2</sub>CH<sub>2</sub>NH, NCH<sub>2</sub>CH<sub>2</sub>N), 3.64-3.51 (br m, 3060H, CH<sub>2</sub>OCH<sub>2</sub>CH<sub>2</sub>OCH<sub>2</sub>CH<sub>2</sub>OCH<sub>2</sub>), 3.44 (br, 1020H, C<sub>3</sub>N<sub>3</sub>-NHCH<sub>2</sub>CH<sub>2</sub>CH<sub>2</sub>O), 2.84 (br, 1536H, HNCH<sub>2</sub>CH<sub>2</sub>N), 1.83 (m, 1020H, OCH<sub>2</sub>CH<sub>2</sub>CH<sub>2</sub>NH); <sup>13</sup>C NMR (100 MHz, CDCl<sub>3</sub>)  $\delta$  166.3, 165.2 (C<sub>3</sub>N<sub>3</sub>), 70.6 (OCH<sub>2</sub>CH<sub>2</sub>O), 70.2 (OCH<sub>2</sub>CH<sub>2</sub>O), 69.3 (NHCH<sub>2</sub>CH<sub>2</sub>CH<sub>2</sub>O), 69.2 (NHCH<sub>2</sub>CH<sub>2</sub>CH<sub>2</sub>O), 46.0 (NCH<sub>2</sub>CH<sub>2</sub>NH), 44.2 (NCH<sub>2</sub>CH<sub>2</sub>NH), 43.0 (NCH<sub>2</sub>CH<sub>2</sub>N), 38.1 (NHCH<sub>2</sub>CH<sub>2</sub>CH<sub>2</sub>O), 29.7 (NHCH<sub>2</sub>CH<sub>2</sub>CH<sub>2</sub>O); MS (MALDI-TOF) calcd for C<sub>5736</sub>H<sub>10074</sub>N<sub>2676</sub>O<sub>765</sub> 128693.17, not found.

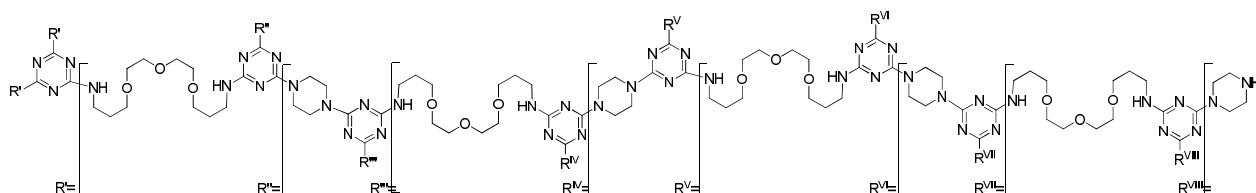

SI Figure 30.  $^1\text{H}$ NMR

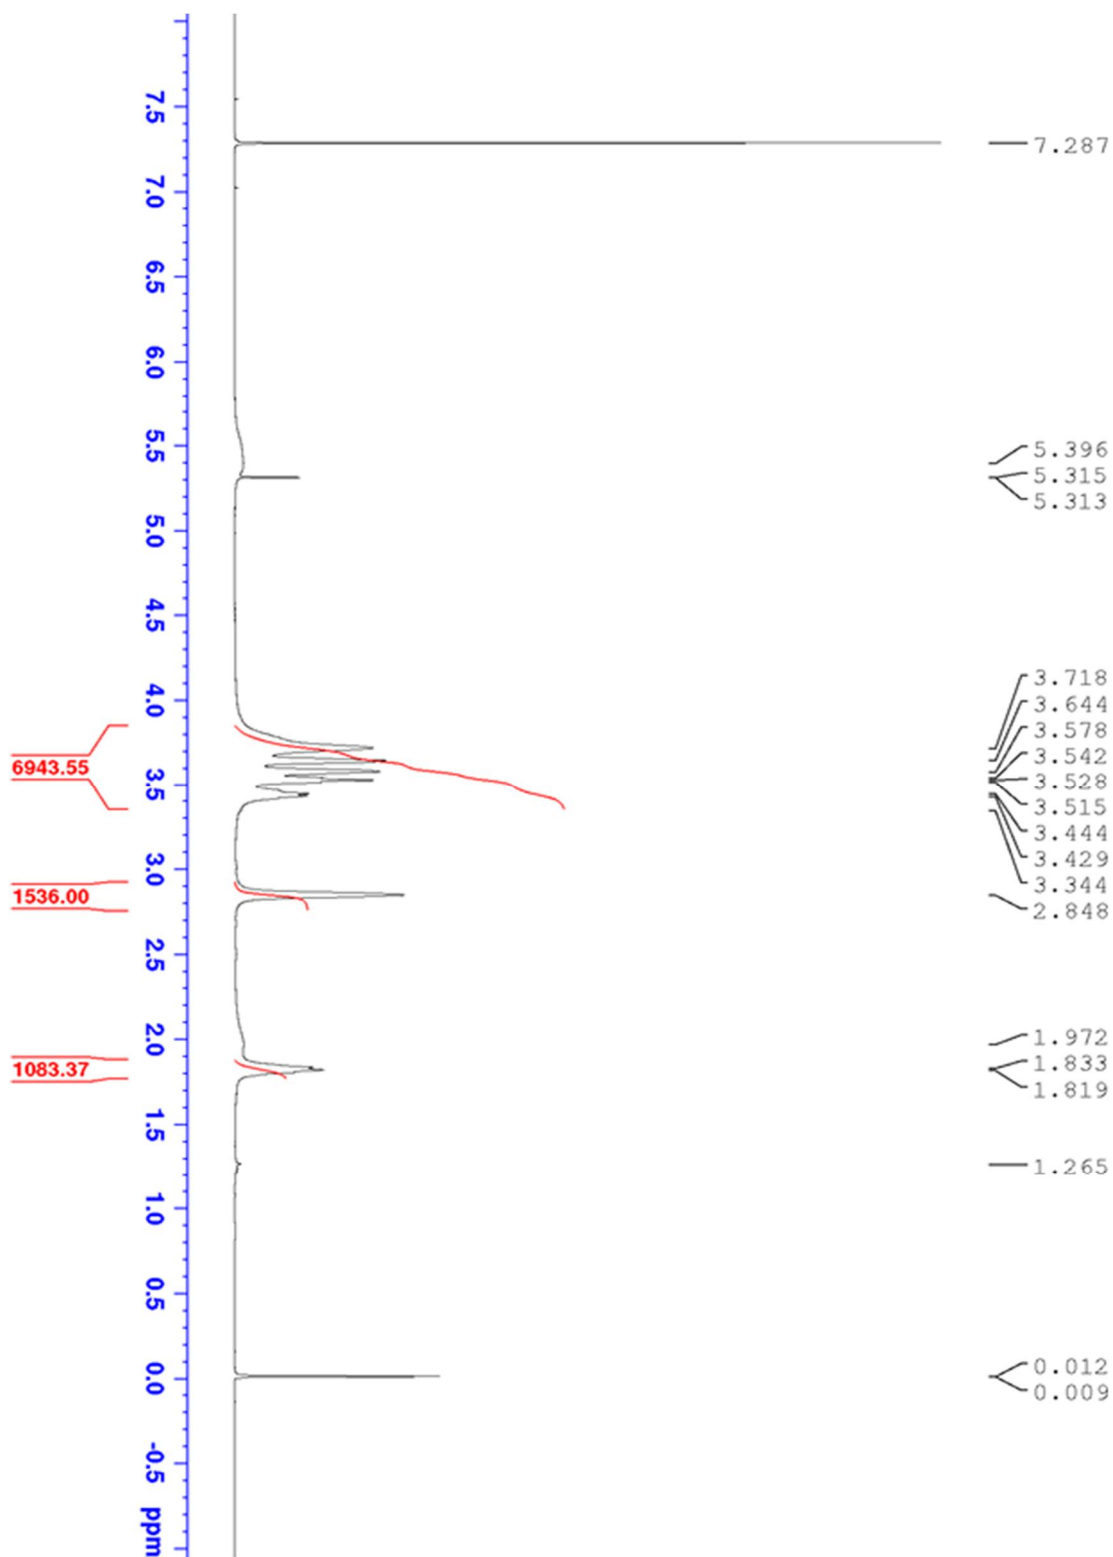

SI Figure 31.  $^{13}\text{C}$ NMR

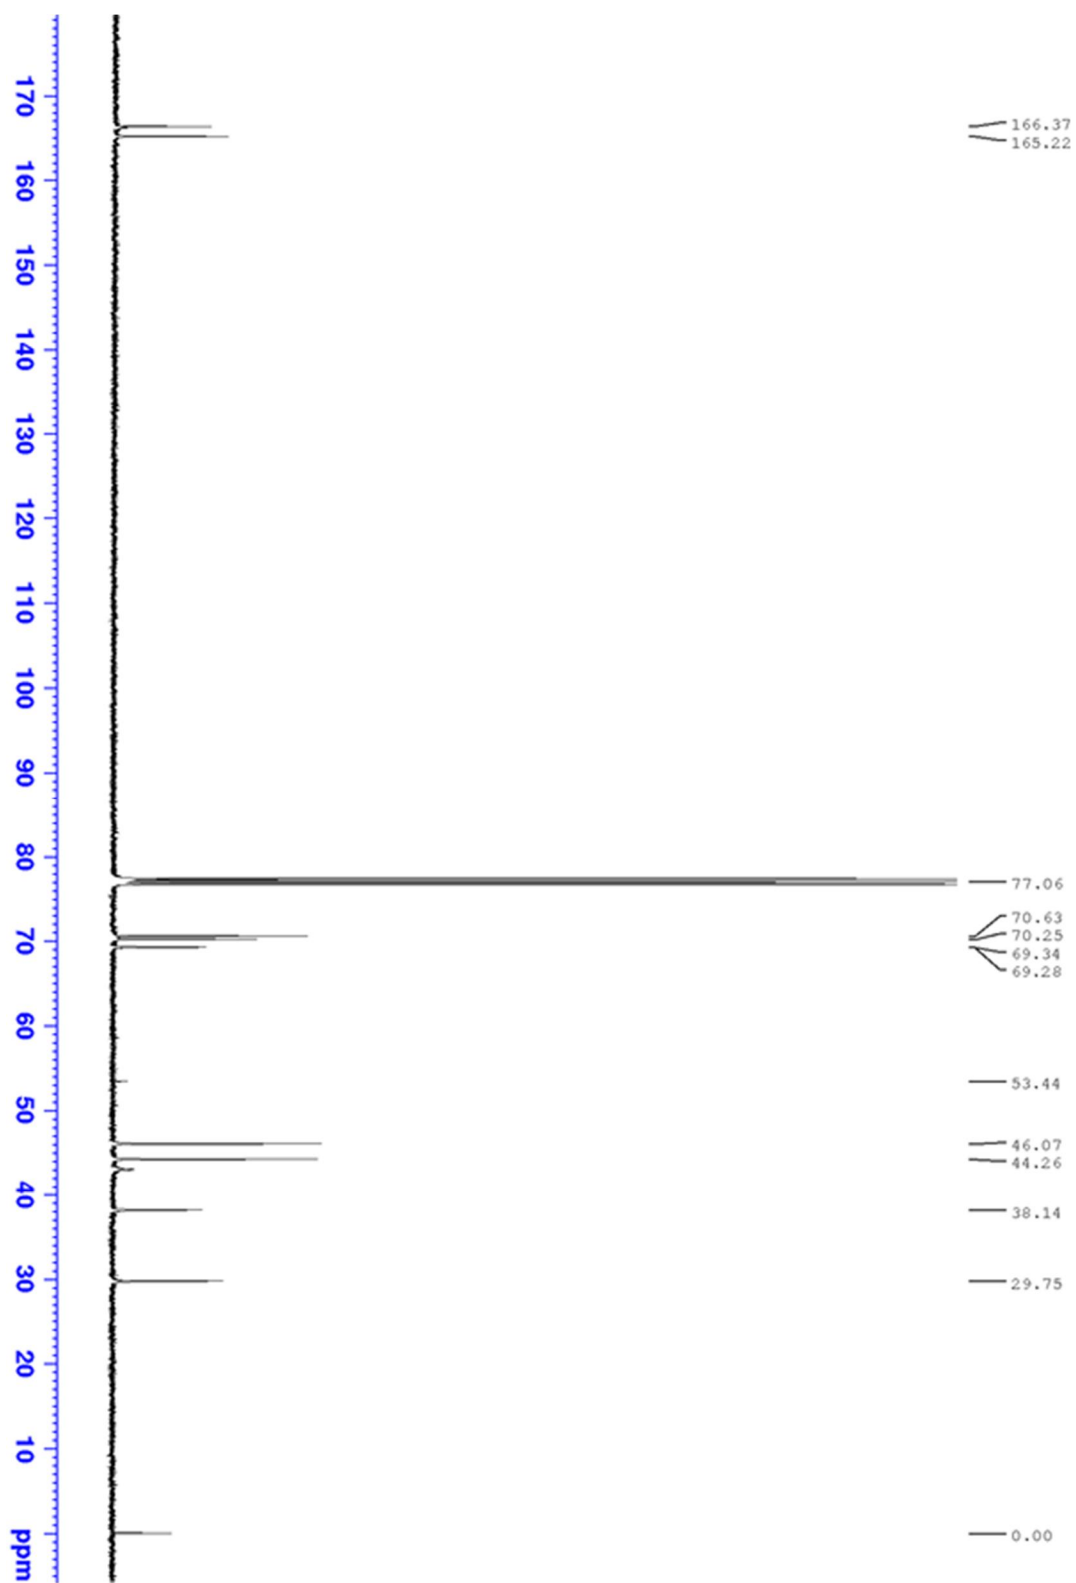

**Compound 12 (G9-Boc).** A solution of **3** (0.430g, 0.30 mmol) with **11** (0.050g, 0.39  $\mu$ mol) and DIPEA (0.08mL, 0.46 mmol) in 3mL of 1,4 dioxane, 1mL MeOH and 0.5mL H<sub>2</sub>O was stirred for 2 minutes. Then, the solution was irradiated in the microwave while stirring for 6 hours at 95°C using dynamic mode and then evaporated under vacuum. The residue was dissolved in dichloromethane, washed with brine solution and dried over MgSO<sub>4</sub>, filtered, and evaporated under vacuum. The crude was purified by several washes with MeOH to give **10** (0.209g, 80%) as a white wax. <sup>1</sup>H NMR (400 MHz, CDCl<sub>3</sub>)  $\delta$  3.71 (br, 10224H, NCH<sub>2</sub>CH<sub>2</sub>NBoc, NCH<sub>2</sub>CH<sub>2</sub>N), 3.63-3.52 (br m, 12276H, CH<sub>2</sub>OCH<sub>2</sub>CH<sub>2</sub>OCH<sub>2</sub>CH<sub>2</sub>OCH<sub>2</sub>), 3.41 (br, 10236H, C<sub>3</sub>N<sub>3</sub>-NHCH<sub>2</sub>CH<sub>2</sub>CH<sub>2</sub>O, BocNCH<sub>2</sub>CH<sub>2</sub>N), 1.80 (m, 4092H, OCH<sub>2</sub>CH<sub>2</sub>CH<sub>2</sub>NH), 1.46 (s, 13824H, C(CH<sub>3</sub>)<sub>3</sub>); <sup>13</sup>C NMR (100 MHz, CDCl<sub>3</sub>)  $\delta$  166.2, 165.2 (C<sub>3</sub>N<sub>3</sub>), 154.7 (CO), 79.8 (C(CH<sub>3</sub>)<sub>3</sub>), 70.6 (OCH<sub>2</sub>CH<sub>2</sub>O), 70.2 (OCH<sub>2</sub>CH<sub>2</sub>O), 69.3 (NHCH<sub>2</sub>CH<sub>2</sub>CH<sub>2</sub>O), 42.9 (piperazine), 38.2 (NHCH<sub>2</sub>CH<sub>2</sub>CH<sub>2</sub>O), 29.6 (NHCH<sub>2</sub>CH<sub>2</sub>CH<sub>2</sub>O), 28.4 (C(CH<sub>3</sub>)<sub>3</sub>); MS (MALDI-TOF) calcd for C<sub>306</sub>H<sub>526</sub>N<sub>1074</sub>O<sub>6141</sub> 670080.15, not found.

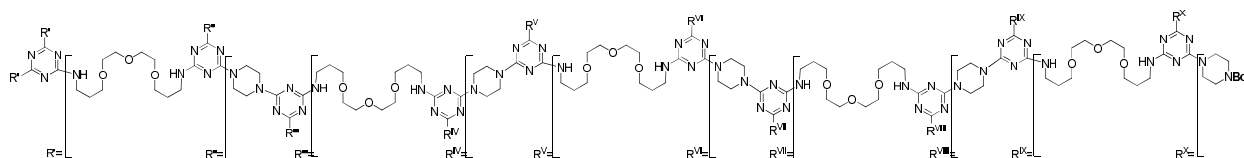

SI Figure 32.  $^1\text{H}$ NMR

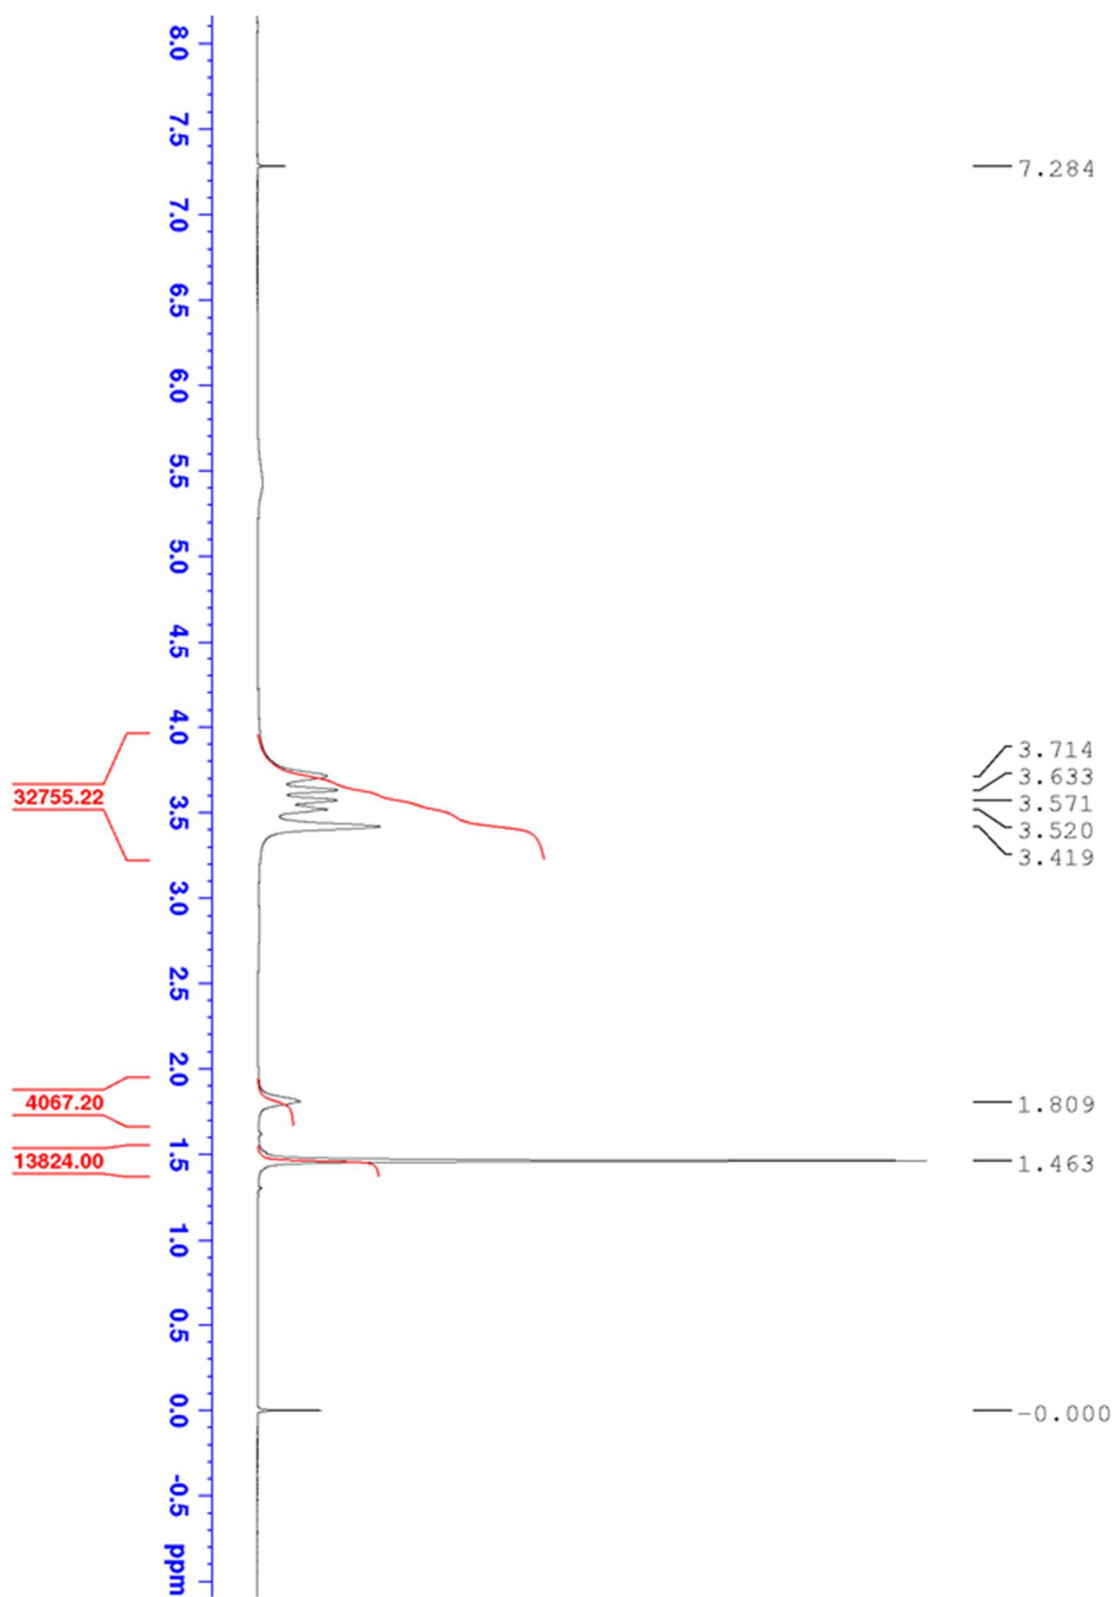

SI Figure 33.  $^{13}\text{C}$ NMR

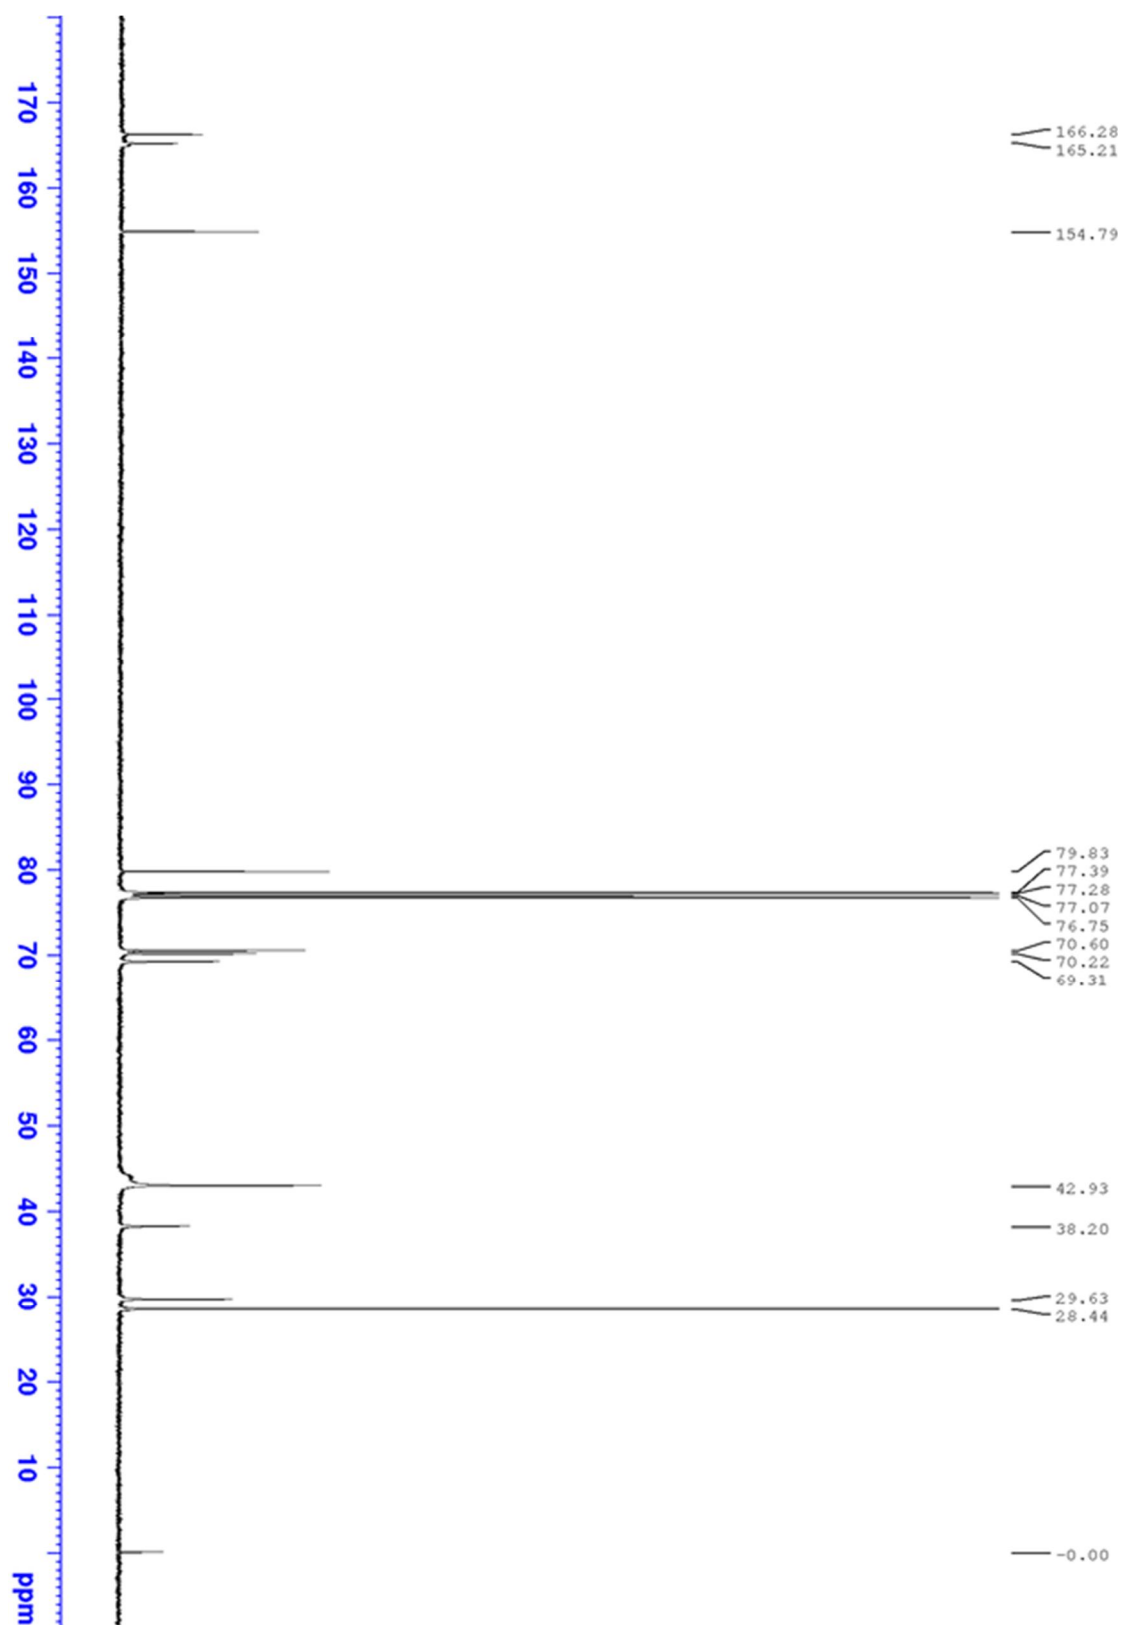



# ==== Shimadzu LabSolutions GPC Calibration Curve ====

## <Calibration Curve>

Detector Name : Detector A  
 Ch# : Channel 1  
 Method File : C:\LabSolutions\Data\SCAAC\TCU\Agilent\_TCU\_Polymers\Method 1 ;  
 Curve Fit Type : Linear  
 Function :  $f(x) = -0.9359686 \cdot x + 10.92512$   
 $R^2 = 0.9989695$  Dispersion = 0.03092953

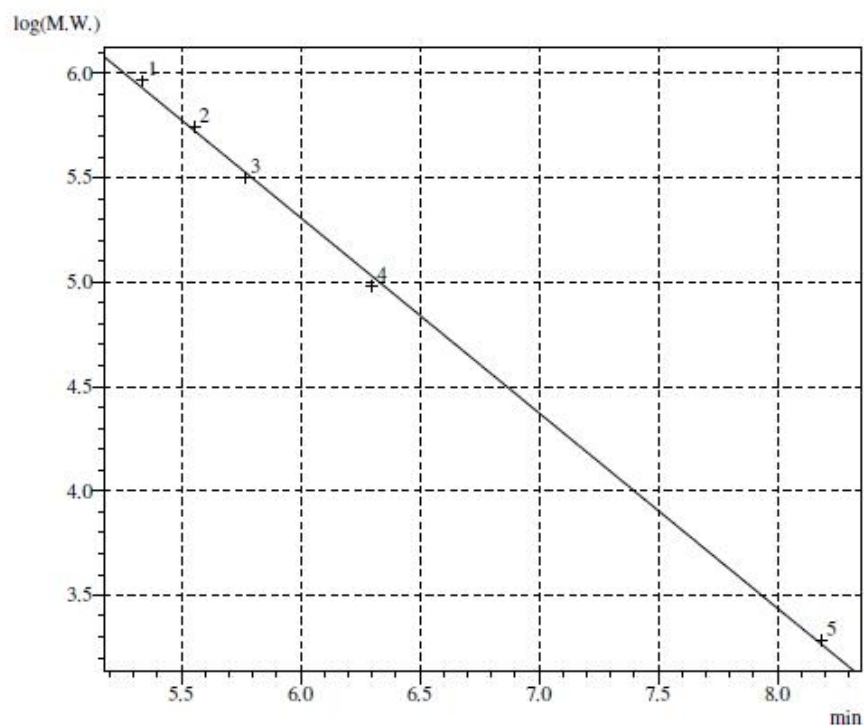

| # | Time(min) | Molecular Weight | Error(%) | Active  | Virtual  |
|---|-----------|------------------|----------|---------|----------|
| 1 | 5.336     | 925000           | 7.8599   | Enabled | Disabled |
| 2 | 5.555     | 554000           | 3.8991   | Enabled | Disabled |
| 3 | 5.768     | 319000           | -5.3836  | Enabled | Disabled |
| 4 | 6.298     | 96000            | -11.8336 | Enabled | Disabled |
| 5 | 8.184     | 1920             | 4.1750   | Enabled | Disabled |

# Macromonomer

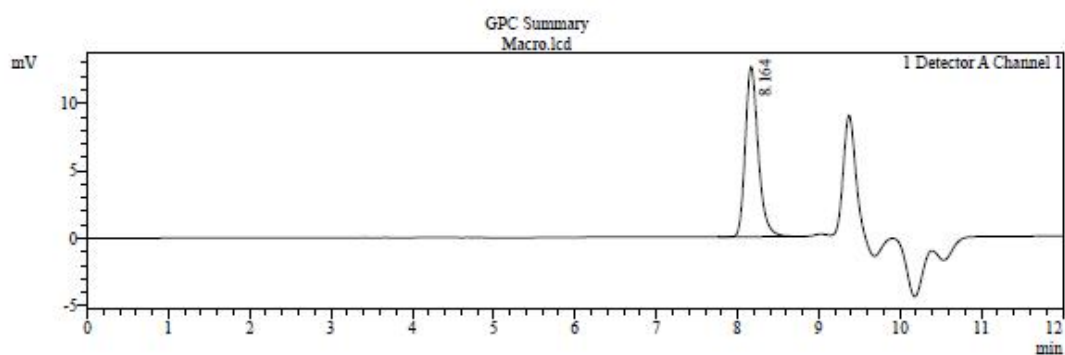

Chromatogram Detector 1 Ch1

| Sample Name | # | Title     | Mn    | Mw    | Mz    | Mz1   | Mv    |
|-------------|---|-----------|-------|-------|-------|-------|-------|
| Macro       | 1 | Macro.lcd | 1809  | 1871  | 1927  | 1980  | 0     |
|             |   | Average   | 1809  | 1871  | 1927  | 1980  | 0     |
|             |   | %RSD      | 0.000 | 0.000 | 0.000 | 0.000 | 0.000 |
|             |   | Maximum   | 1809  | 1871  | 1927  | 1980  | 0     |
|             |   | Minimum   | 1809  | 1871  | 1927  | 1980  | 0     |
|             |   | SD        | 0     | 0     | 0     | 0     | 0     |

# G1-BOC

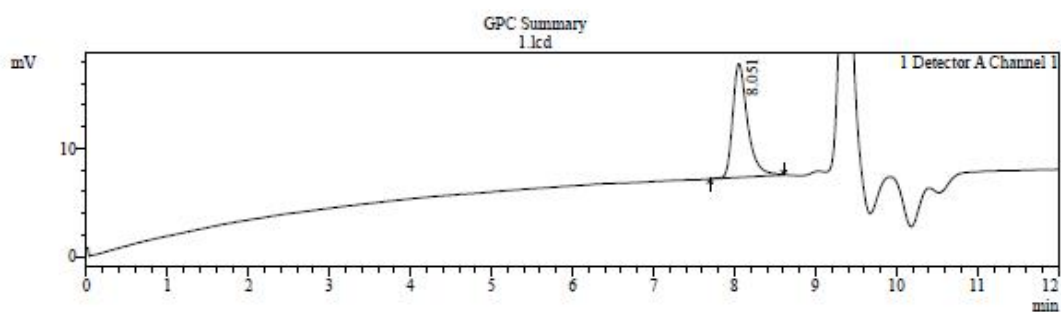

Chromatogram Detector 1 Ch1

| Sample Name | # | Title   | Mn    | Mw    | Mz    | Mz1   | Mv    |
|-------------|---|---------|-------|-------|-------|-------|-------|
| 1           | 1 | 1.lcd   | 2215  | 2331  | 2431  | 2521  | 0     |
|             |   | Average | 2215  | 2331  | 2431  | 2521  | 0     |
|             |   | %RSD    | 0.000 | 0.000 | 0.000 | 0.000 | 0.000 |
|             |   | Maximum | 2215  | 2331  | 2431  | 2521  | 0     |
|             |   | Minimum | 2215  | 2331  | 2431  | 2521  | 0     |
|             |   | SD      | 0     | 0     | 0     | 0     | 0     |

# G3-BOC

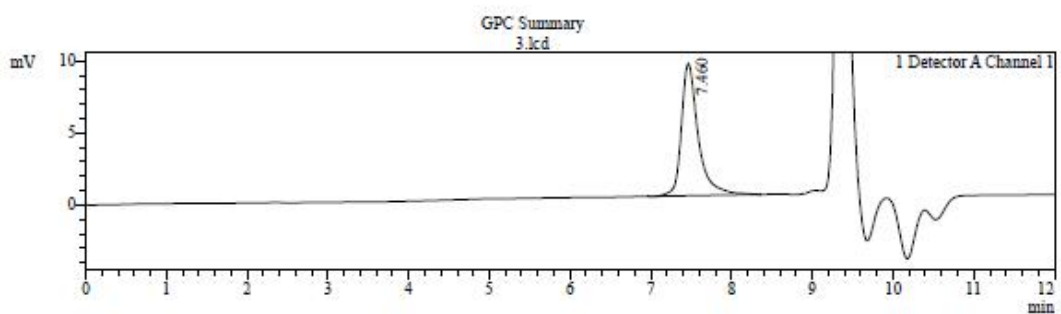

Chromatogram Detector 1 Ch1

| Sample Name | # | Title   | Mn    | Mw    | Mz    | Mz1   | Mv    |
|-------------|---|---------|-------|-------|-------|-------|-------|
| 3           | 1 | 3.lcd   | 7477  | 8221  | 8789  | 9298  | 0     |
|             |   | Average | 7477  | 8221  | 8789  | 9298  | 0     |
|             |   | %RSD    | 0.000 | 0.000 | 0.000 | 0.000 | 0.000 |
|             |   | Maximum | 7477  | 8221  | 8789  | 9298  | 0     |
|             |   | Minimum | 7477  | 8221  | 8789  | 9298  | 0     |
|             |   | SD      | 0     | 0     | 0     | 0     | 0     |

### G5-BOC

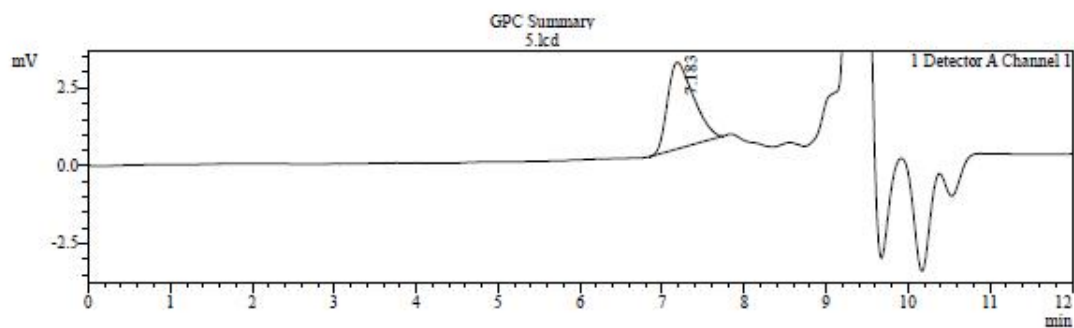

Chromatogram Detector 1 Ch1

| # | Title   | Mn    | Mw    | Mz    | Mz1   | Mv    |
|---|---------|-------|-------|-------|-------|-------|
| 1 | 5.lcd   | 13141 | 14577 | 15929 | 17157 | 0     |
|   | Average | 13141 | 14577 | 15929 | 17157 | 0     |
|   | %RSD    | 0.000 | 0.000 | 0.000 | 0.000 | 0.000 |
|   | Maximum | 13141 | 14577 | 15929 | 17157 | 0     |
|   | Minimum | 13141 | 14577 | 15929 | 17157 | 0     |
|   | SD      | 0     | 0     | 0     | 0     | 0     |

### G5-BOC longer time of irradiation

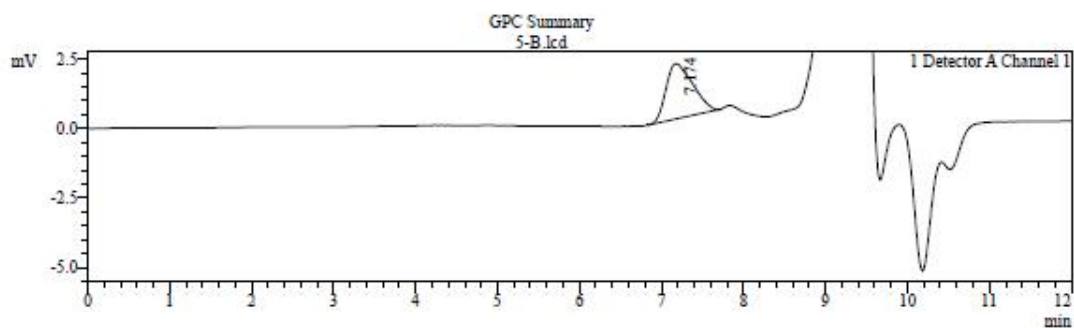

Chromatogram Detector 1 Ch1

| Sample Name | # | Title   | Mn    | Mw    | Mz    | Mz1   | Mv    |
|-------------|---|---------|-------|-------|-------|-------|-------|
| 5-B         | 1 | 5-B.lcd | 13476 | 14901 | 16276 | 17547 | 0     |
|             |   | Average | 13476 | 14901 | 16276 | 17547 | 0     |
|             |   | %RSD    | 0.000 | 0.000 | 0.000 | 0.000 | 0.000 |
|             |   | Maximum | 13476 | 14901 | 16276 | 17547 | 0     |
|             |   | Minimum | 13476 | 14901 | 16276 | 17547 | 0     |
|             |   | SD      | 0     | 0     | 0     | 0     | 0     |

# G7-BOC

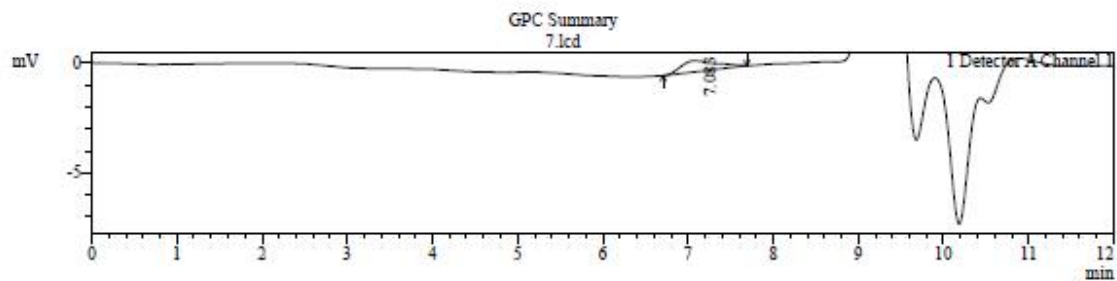

Chromatogram Detector 1 Ch1

| Sample Name | # | Title   | Mn    | Mw    | Mz    | Mzl   | Mv    |
|-------------|---|---------|-------|-------|-------|-------|-------|
| 7           | 1 | 7.lcd   | 15652 | 18517 | 21208 | 23537 | 0     |
|             |   | Average | 15652 | 18517 | 21208 | 23537 | 0     |
|             |   | %RSD    | 0.000 | 0.000 | 0.000 | 0.000 | 0.000 |
|             |   | Maximum | 15652 | 18517 | 21208 | 23537 | 0     |
|             |   | Minimum | 15652 | 18517 | 21208 | 23537 | 0     |
|             |   | SD      | 0     | 0     | 0     | 0     | 0     |
